# Supplementary material for: A computational study of a light-driven artificial device: a third generation rotational photo-molecular motor in dilute solutions
Source: Royal Society of Chemistry journal article supplement (doi:10.1039/d3cp05116a), 2024-01-01
Supplement: d3cp05116a1.pdf [file d3cp05116a1.pdf]

## Electronic Supporting Information (ESI)

### A computational study of a light-driven artificial device: a third generation rotational photo-molecular motor in dilute solutions

Costantino Zazza<sup>1</sup>, Stefano Borocci<sup>1</sup>, and Nico Sanna<sup>1,2</sup>

<sup>1</sup>Department for Innovation in Biological, Agro-food and Forest systems  
Università della Tuscia (DIBAF),  
L.go dell'Università, s.n.c., 01100 Viterbo, Italy.

<sup>2</sup>CNR-ISTP (Istituto per la Scienza e Tecnologia dei Plasmi), Via G. Amendola 122/D, 70126 Bari, Italy.

Supplementary Information sections are organized as follows: first, we have introduced the optimized molecular geometries as obtained by the application of several Density Functionals (B3LYP, Cam-B3LYP, PBE, PBE0) in conjunction with the Conductor-like and Polarizable Continuum model (C-PCM), then we report the applied all-atoms topology files used for simulating the artificial rotor in different rotamers via a classical molecular dynamics (MD) framework in acetonitrile dilute solution.

#### Quantum mechanics optimized structures and Molecular Dynamics files (gro e itp):

In this section we share the optimized molecular structures obtained considering the investigated molecular motor in three different conformations: stable and meta-stable product. Moreover, we also report the files used for simulating the investigated motor in acetonitrile dilute solution at room temperature (gro and itp files for the selected OPLS-AAA mechanical force field):

#### Cam-B3LYP(D3)/ 6-311+g\*\*/most-stable rotamer/C-PCM(ACN)

|   |           |           |           |
|---|-----------|-----------|-----------|
| 6 | 1.202747  | -0.275047 | 0.340607  |
| 6 | -0.000003 | 0.673925  | 0.041353  |
| 6 | -1.202773 | -0.275009 | 0.340646  |
| 6 | -0.697924 | -1.307828 | 1.244611  |
| 6 | 0.697893  | -1.307855 | 1.244587  |
| 6 | 1.401444  | -2.041448 | 2.200937  |
| 6 | 0.699336  | -2.793706 | 3.124201  |
| 6 | -0.699373 | -2.793680 | 3.124223  |
| 6 | -1.401478 | -2.041393 | 2.200979  |
| 6 | -0.000019 | 1.044104  | -1.446427 |
| 1 | 2.481161  | -1.995243 | 2.241860  |
| 1 | 1.235589  | -3.356816 | 3.878158  |

|   |           |           |           |
|---|-----------|-----------|-----------|
| 1 | -1.235624 | -3.356767 | 3.878197  |
| 1 | -2.481192 | -1.995142 | 2.241930  |
| 6 | 0.000032  | 1.878981  | 1.003433  |
| 1 | -0.000041 | 0.126701  | -2.034882 |
| 1 | 0.880323  | 1.616642  | -1.725156 |
| 1 | -0.880350 | 1.616669  | -1.725133 |
| 6 | -0.000010 | 3.190708  | 0.535134  |
| 6 | 0.000021  | 4.270646  | 1.410522  |
| 6 | 0.000095  | 4.059430  | 2.780504  |
| 6 | 0.000139  | 2.756503  | 3.263446  |
| 6 | 0.000109  | 1.681887  | 2.386328  |
| 1 | -0.000072 | 3.391603  | -0.528296 |
| 1 | -0.000015 | 5.278305  | 1.012533  |
| 1 | 0.000119  | 4.898465  | 3.465594  |
| 1 | 0.000198  | 2.572213  | 4.331194  |
| 1 | 0.000145  | 0.679833  | 2.793825  |
| 6 | -2.457465 | -0.243767 | -0.176467 |
| 6 | -3.328898 | -1.438130 | -0.393902 |
| 6 | -4.532607 | -1.023200 | -0.990004 |
| 6 | -4.502314 | 0.428581  | -1.135344 |
| 6 | -3.255916 | 0.900077  | -0.681414 |
| 6 | -3.043934 | 2.273605  | -0.626649 |
| 6 | -4.026216 | 3.143055  | -1.086669 |
| 6 | -5.235965 | 2.660464  | -1.578816 |
| 6 | -5.484946 | 1.293959  | -1.591707 |
| 1 | -5.990860 | 3.352403  | -1.932348 |
| 1 | -3.847309 | 4.211073  | -1.050708 |
| 1 | -6.437651 | 0.911707  | -1.939136 |
| 1 | -2.137957 | 2.682022  | -0.212710 |
| 6 | -3.073552 | -2.803877 | -0.291324 |
| 6 | -4.038423 | -3.716935 | -0.698030 |
| 6 | -5.252730 | -3.289476 | -1.231728 |
| 6 | -5.498609 | -1.933575 | -1.395201 |
| 1 | -2.134624 | -3.172663 | 0.093919  |
| 1 | -3.837071 | -4.777334 | -0.603624 |
| 1 | -5.993835 | -4.016918 | -1.540260 |
| 1 | -6.420768 | -1.591863 | -1.850520 |
| 6 | 2.457433  | -0.243814 | -0.176522 |
| 6 | 3.328847  | -1.438183 | -0.393997 |
| 6 | 3.255908  | 0.900037  | -0.681422 |
| 6 | 4.532593  | -1.023248 | -0.990017 |
| 6 | 4.502326  | 0.428539  | -1.135301 |
| 6 | 5.498593  | -1.933626 | -1.395216 |
| 6 | 5.252668  | -3.289528 | -1.231834 |
| 6 | 4.038321  | -3.716989 | -0.698229 |
| 6 | 3.073454  | -2.803930 | -0.291520 |
| 1 | 5.993769  | -4.016973 | -1.540371 |
| 1 | 3.836936  | -4.777389 | -0.603902 |
| 1 | 2.134491  | -3.172708 | 0.093647  |
| 1 | 6.420782  | -1.591913 | -1.850472 |
| 6 | 3.043932  | 2.273564  | -0.626658 |
| 6 | 4.026246  | 3.143015  | -1.086613 |
| 6 | 5.236020  | 2.660423  | -1.578696 |
| 6 | 5.484989  | 1.293916  | -1.591596 |
| 1 | 6.437708  | 0.911661  | -1.938984 |
| 1 | 5.990940  | 3.352362  | -1.932177 |
| 1 | 3.847341  | 4.211032  | -1.050651 |
| 1 | 2.137934  | 2.681988  | -0.212773 |

**Cam-B3LYP(D3)/ 6-311+g\*\*/Phe-orth rotamer/C-PCM (ACN)**

|   |           |           |          |
|---|-----------|-----------|----------|
| 6 | 1.190217  | 0.198743  | 0.297655 |
| 6 | 0.000019  | -0.784461 | 0.094057 |
| 6 | -1.190196 | 0.198737  | 0.297620 |

|   |           |           |           |
|---|-----------|-----------|-----------|
| 6 | 0.697848  | 1.184870  | 1.266371  |
| 6 | -0.698829 | 2.585791  | 3.206889  |
| 6 | -0.697857 | 1.184875  | 1.266339  |
| 6 | -1.402724 | 1.875481  | 2.250008  |
| 1 | -2.483123 | 1.834850  | 2.282860  |
| 6 | 2.413188  | 0.205496  | -0.284960 |
| 6 | 3.200813  | -0.906963 | -0.889717 |
| 6 | 3.287349  | 1.408336  | -0.428986 |
| 6 | 2.972924  | -2.277841 | -0.991668 |
| 6 | 4.456457  | -0.407868 | -1.288376 |
| 6 | 3.033158  | 2.763673  | -0.235463 |
| 6 | 4.495391  | 1.029206  | -1.035668 |
| 6 | 3.955890  | -3.106393 | -1.520753 |
| 1 | 2.049262  | -2.724984 | -0.664164 |
| 6 | 5.439337  | -1.233816 | -1.811535 |
| 6 | 4.005993  | 3.698701  | -0.567148 |
| 1 | 2.089311  | 3.106824  | 0.161303  |
| 6 | 5.470351  | 1.960468  | -1.364665 |
| 6 | 5.180732  | -2.592354 | -1.935438 |
| 1 | 3.761880  | -4.168932 | -1.604439 |
| 1 | 6.398061  | -0.826376 | -2.110129 |
| 6 | 5.225961  | 3.303156  | -1.112226 |
| 1 | 3.806491  | 4.751204  | -0.404934 |
| 1 | 6.397398  | 1.647458  | -1.830509 |
| 1 | 5.935462  | -3.253892 | -2.343229 |
| 1 | 5.973190  | 4.046954  | -1.361269 |
| 1 | -1.234944 | 3.118427  | 3.982853  |
| 6 | -2.413164 | 0.205488  | -0.285002 |
| 6 | -3.287311 | 1.408338  | -0.429004 |
| 6 | -3.200825 | -0.906964 | -0.889733 |
| 6 | -3.033096 | 2.763666  | -0.235447 |
| 6 | -4.495356 | 1.029239  | -1.035695 |
| 6 | -2.972988 | -2.277853 | -0.991653 |
| 6 | -4.456454 | -0.407835 | -1.288403 |
| 6 | -4.005910 | 3.698719  | -0.567125 |
| 1 | -2.089245 | 3.106788  | 0.161335  |
| 6 | -5.470294 | 1.960526  | -1.364686 |
| 6 | -3.955979 | -3.106380 | -1.520731 |
| 1 | -2.049348 | -2.725027 | -0.664131 |
| 6 | -5.439358 | -1.233759 | -1.811555 |
| 6 | -5.225880 | 3.303205  | -1.112224 |
| 1 | -3.806391 | 4.751215  | -0.404890 |
| 1 | -6.397348 | 1.647541  | -1.830535 |
| 6 | -5.180799 | -2.592306 | -1.935437 |
| 1 | -3.762005 | -4.168928 | -1.604395 |
| 1 | -6.398069 | -0.826292 | -2.110155 |
| 1 | -5.973093 | 4.047021  | -1.361259 |
| 1 | -5.935549 | -3.253826 | -2.343221 |
| 6 | 0.698741  | 2.585776  | 3.206927  |
| 1 | 1.234825  | 3.118402  | 3.982921  |
| 6 | 1.402675  | 1.875457  | 2.250082  |
| 1 | 2.483072  | 1.834810  | 2.282990  |
| 6 | 0.000066  | -1.424439 | -1.315779 |
| 1 | 0.000073  | -2.511913 | -1.277756 |
| 1 | -0.869285 | -1.111601 | -1.884740 |
| 1 | 0.869456  | -1.111592 | -1.884678 |
| 6 | 0.000002  | -1.803846 | 1.259764  |
| 6 | -1.193514 | -2.262529 | 1.816939  |
| 6 | 1.193500  | -2.262501 | 1.817000  |
| 6 | -1.196261 | -3.184956 | 2.855245  |
| 1 | -2.140339 | -1.884082 | 1.459730  |
| 6 | 1.196215  | -3.184928 | 2.855307  |
| 1 | 2.140334  | -1.884031 | 1.459839  |
| 6 | -0.000030 | -3.659760 | 3.374465  |

|   |           |           |          |
|---|-----------|-----------|----------|
| 1 | -2.140927 | -3.522200 | 3.265215 |
| 1 | 2.140869  | -3.522149 | 3.265325 |
| 1 | -0.000043 | -4.376851 | 4.186510 |

**Cam-B3LYP(D3)/ 6-311+g\*\*/most-stable rotamer/C-PCM(CHX)**

|   |           |           |           |
|---|-----------|-----------|-----------|
| 6 | 1.202920  | -0.272310 | 0.347206  |
| 6 | 0.000015  | 0.675914  | 0.044427  |
| 6 | -1.203094 | -0.272049 | 0.347292  |
| 6 | -0.697951 | -1.302153 | 1.254476  |
| 6 | 0.697631  | -1.302316 | 1.254416  |
| 6 | 1.401132  | -2.033757 | 2.212421  |
| 6 | 0.699019  | -2.783777 | 3.137326  |
| 6 | -0.699523 | -2.783622 | 3.137380  |
| 6 | -1.401540 | -2.033443 | 2.212530  |
| 6 | 0.000032  | 1.038774  | -1.445280 |
| 1 | 2.480991  | -1.986976 | 2.250877  |
| 1 | 1.235534  | -3.345174 | 3.892580  |
| 1 | -1.236104 | -3.344900 | 3.892674  |
| 1 | -2.481386 | -1.986421 | 2.251069  |
| 6 | 0.000262  | 1.886396  | 0.998607  |
| 1 | -0.000074 | 0.118666  | -2.029310 |
| 1 | 0.881713  | 1.608373  | -1.726616 |
| 1 | -0.881535 | 1.608559  | -1.726596 |
| 6 | 0.001452  | 3.195163  | 0.522464  |
| 6 | 0.001722  | 4.280256  | 1.390832  |
| 6 | 0.000815  | 4.077479  | 2.761687  |
| 6 | -0.000342 | 2.778003  | 3.252206  |
| 6 | -0.000599 | 1.698237  | 2.382239  |
| 1 | 0.002215  | 3.387161  | -0.542642 |
| 1 | 0.002655  | 5.285825  | 0.987201  |
| 1 | 0.001024  | 4.920629  | 3.441689  |
| 1 | -0.001042 | 2.600407  | 4.321084  |
| 1 | -0.001494 | 0.698292  | 2.794823  |
| 6 | -2.456818 | -0.244283 | -0.171009 |
| 6 | -3.325541 | -1.440496 | -0.389451 |
| 6 | -4.526052 | -1.028646 | -0.993233 |
| 6 | -4.497479 | 0.422841  | -1.140903 |
| 6 | -3.255295 | 0.897110  | -0.680223 |
| 6 | -3.047169 | 2.270384  | -0.620181 |
| 6 | -4.028261 | 3.137835  | -1.085324 |
| 6 | -5.232743 | 2.653063  | -1.586489 |
| 6 | -5.478541 | 1.286432  | -1.602019 |
| 1 | -5.987143 | 3.343714  | -1.943665 |
| 1 | -3.853559 | 4.206395  | -1.044208 |
| 1 | -6.428696 | 0.902361  | -1.954374 |
| 1 | -2.146548 | 2.678681  | -0.194544 |
| 6 | -3.068075 | -2.805090 | -0.283326 |
| 6 | -4.028643 | -3.720639 | -0.693333 |
| 6 | -5.239957 | -3.296460 | -1.234700 |
| 6 | -5.486952 | -1.941737 | -1.402259 |
| 1 | -2.129578 | -3.170344 | 0.106294  |
| 1 | -3.825636 | -4.780543 | -0.596755 |
| 1 | -5.977724 | -4.025843 | -1.546683 |
| 1 | -6.406573 | -1.602563 | -1.864560 |
| 6 | 2.456647  | -0.244643 | -0.171078 |
| 6 | 3.325322  | -1.440881 | -0.389565 |
| 6 | 3.255170  | 0.896744  | -0.680215 |
| 6 | 4.525880  | -1.029035 | -0.993260 |
| 6 | 4.497364  | 0.422464  | -1.140850 |
| 6 | 5.486765  | -1.942139 | -1.402297 |
| 6 | 5.239706  | -3.296863 | -1.234839 |
| 6 | 4.028346  | -3.721031 | -0.693564 |
| 6 | 3.067794  | -2.805471 | -0.283545 |

|   |          |           |           |
|---|----------|-----------|-----------|
| 1 | 5.977459 | -4.026254 | -1.546834 |
| 1 | 3.825293 | -4.780933 | -0.597069 |
| 1 | 2.129262 | -3.170713 | 0.106004  |
| 1 | 6.406422 | -1.602972 | -1.864531 |
| 6 | 3.047050 | 2.270019  | -0.620141 |
| 6 | 4.028185 | 3.137468  | -1.085196 |
| 6 | 5.232691 | 2.652691  | -1.586303 |
| 6 | 5.478467 | 1.286055  | -1.601876 |
| 1 | 6.428634 | 0.901982  | -1.954197 |
| 1 | 5.987122 | 3.343343  | -1.943411 |
| 1 | 3.853496 | 4.206030  | -1.044061 |
| 1 | 2.146396 | 2.678313  | -0.194557 |

**Cam-B3LYP(D3)/ 6-311+g\*\*/Phe-orth rotamer/C-PCM (CHX)**

|   |           |           |           |
|---|-----------|-----------|-----------|
| 6 | 1.190785  | 0.200767  | 0.295670  |
| 6 | 0.000101  | -0.781650 | 0.092618  |
| 6 | -1.190198 | 0.201412  | 0.295119  |
| 6 | 0.698096  | 1.189223  | 1.261895  |
| 6 | -0.698322 | 2.594642  | 3.198597  |
| 6 | -0.697325 | 1.189702  | 1.261468  |
| 6 | -1.402062 | 1.882652  | 2.243412  |
| 1 | -2.482488 | 1.841556  | 2.274916  |
| 6 | 2.414217  | 0.205778  | -0.285494 |
| 6 | 3.201380  | -0.907962 | -0.888176 |
| 6 | 3.290193  | 1.407162  | -0.428954 |
| 6 | 2.971401  | -2.278089 | -0.990425 |
| 6 | 4.458691  | -0.411123 | -1.283188 |
| 6 | 3.036551  | 2.762687  | -0.239138 |
| 6 | 4.499229  | 1.025748  | -1.031180 |
| 6 | 3.954058  | -3.108428 | -1.516262 |
| 1 | 2.046014  | -2.722448 | -0.664173 |
| 6 | 5.440833  | -1.239201 | -1.802947 |
| 6 | 4.011198  | 3.695946  | -0.568576 |
| 1 | 2.090704  | 3.106454  | 0.152240  |
| 6 | 5.475539  | 1.955542  | -1.358059 |
| 6 | 5.180473  | -2.596842 | -1.927374 |
| 1 | 3.758457  | -4.170677 | -1.600183 |
| 1 | 6.401070  | -0.833410 | -2.098882 |
| 6 | 5.232162  | 3.298390  | -1.108468 |
| 1 | 3.811791  | 4.749026  | -0.409998 |
| 1 | 6.403345  | 1.640896  | -1.821272 |
| 1 | 5.935152  | -3.259818 | -2.332977 |
| 1 | 5.980792  | 4.041068  | -1.356669 |
| 1 | -1.234637 | 3.128242  | 3.973900  |
| 6 | -2.413690 | 0.206791  | -0.285932 |
| 6 | -3.288739 | 1.408744  | -0.430280 |
| 6 | -3.202046 | -0.906948 | -0.887112 |
| 6 | -3.033933 | 2.764227  | -0.241721 |
| 6 | -4.498111 | 1.027824  | -1.032131 |
| 6 | -2.973641 | -2.277493 | -0.987330 |
| 6 | -4.458895 | -0.409339 | -1.282650 |
| 6 | -4.007786 | 3.698021  | -0.571988 |
| 1 | -2.087761 | 3.107544  | 0.149268  |
| 6 | -5.473637 | 1.958151  | -1.359833 |
| 6 | -3.957168 | -3.107482 | -1.512091 |
| 1 | -2.048838 | -2.722452 | -0.660269 |
| 6 | -5.441901 | -1.237052 | -1.801359 |
| 6 | -5.229102 | 3.301019  | -1.111489 |
| 1 | -3.807465 | 4.751076  | -0.414397 |
| 1 | -6.401743 | 1.643868  | -1.822690 |
| 6 | -5.182980 | -2.595123 | -1.924024 |
| 1 | -3.762742 | -4.170066 | -1.594482 |
| 1 | -6.401740 | -0.830645 | -2.097738 |

|   |           |           |           |
|---|-----------|-----------|-----------|
| 1 | -5.977106 | 4.044109  | -1.360344 |
| 1 | -5.938368 | -3.257835 | -2.328739 |
| 6 | 0.698970  | 2.594192  | 3.198983  |
| 1 | 1.235205  | 3.127459  | 3.974571  |
| 6 | 1.402768  | 1.881740  | 2.244190  |
| 1 | 2.483151  | 1.839968  | 2.276255  |
| 6 | 0.000664  | -1.420852 | -1.317728 |
| 1 | 0.000238  | -2.508461 | -1.279340 |
| 1 | -0.868402 | -1.108029 | -1.887189 |
| 1 | 0.870726  | -1.108735 | -1.886076 |
| 6 | -0.000567 | -1.802055 | 1.257440  |
| 6 | -1.194236 | -2.262745 | 1.812007  |
| 6 | 1.192362  | -2.260414 | 1.815515  |
| 6 | -1.197326 | -3.187982 | 2.847224  |
| 1 | -2.140575 | -1.882975 | 1.455106  |
| 6 | 1.194213  | -3.185640 | 2.850747  |
| 1 | 2.139000  | -1.878744 | 1.461459  |
| 6 | -0.001852 | -3.663233 | 3.366369  |
| 1 | -2.142336 | -3.526494 | 3.255373  |
| 1 | 2.138678  | -3.522285 | 3.261692  |
| 1 | -0.002340 | -4.382437 | 4.176566  |

**B3LYP(D3)/ 6-311+g\*\*/most-stable rotamer/C-PCM(ACN)**

|   |           |           |           |
|---|-----------|-----------|-----------|
| 6 | 1.208127  | -0.274380 | 0.362539  |
| 6 | -0.000010 | 0.668633  | 0.033045  |
| 6 | -1.208065 | -0.274484 | 0.362515  |
| 6 | -0.703938 | -1.289645 | 1.277686  |
| 6 | 0.704066  | -1.289583 | 1.277700  |
| 6 | 1.408848  | -2.026842 | 2.240679  |
| 6 | 0.703062  | -2.776820 | 3.170183  |
| 6 | -0.702845 | -2.776873 | 3.170175  |
| 6 | -1.408676 | -2.026951 | 2.240660  |
| 6 | -0.000021 | 1.002402  | -1.469779 |
| 1 | 2.489322  | -1.984102 | 2.278779  |
| 1 | 1.238863  | -3.337793 | 3.926987  |
| 1 | -1.238612 | -3.337886 | 3.926973  |
| 1 | -2.489154 | -1.984295 | 2.278744  |
| 6 | -0.000104 | 1.904539  | 0.966530  |
| 1 | 0.000017  | 0.070077  | -2.036038 |
| 1 | 0.882218  | 1.569041  | -1.760024 |
| 1 | -0.882305 | 1.568970  | -1.760026 |
| 6 | -0.000510 | 3.209535  | 0.461529  |
| 6 | -0.000609 | 4.316229  | 1.311865  |
| 6 | -0.000309 | 4.140748  | 2.692733  |
| 6 | 0.000083  | 2.845663  | 3.211885  |
| 6 | 0.000178  | 1.743927  | 2.359909  |
| 1 | -0.000763 | 3.383560  | -0.606828 |
| 1 | -0.000925 | 5.313558  | 0.886893  |
| 1 | -0.000387 | 4.998134  | 3.355825  |
| 1 | 0.000314  | 2.689376  | 4.284831  |
| 1 | 0.000481  | 0.752523  | 2.793486  |
| 6 | -2.474944 | -0.247544 | -0.159741 |
| 6 | -3.332322 | -1.448672 | -0.386098 |
| 6 | -4.545839 | -1.039818 | -0.990236 |
| 6 | -4.525745 | 0.411746  | -1.129446 |
| 6 | -3.275606 | 0.892026  | -0.662767 |
| 6 | -3.070052 | 2.272738  | -0.604525 |
| 6 | -4.057674 | 3.142283  | -1.069521 |
| 6 | -5.268354 | 2.653283  | -1.570930 |
| 6 | -5.512937 | 1.279873  | -1.589015 |
| 1 | -6.024807 | 3.343225  | -1.927220 |

|   |           |           |           |
|---|-----------|-----------|-----------|
| 1 | -3.883228 | 4.211669  | -1.030964 |
| 1 | -6.463274 | 0.895507  | -1.942515 |
| 1 | -2.166948 | 2.683785  | -0.185556 |
| 6 | -3.063814 | -2.818224 | -0.286013 |
| 6 | -4.021343 | -3.743395 | -0.701658 |
| 6 | -5.242587 | -3.324205 | -1.242776 |
| 6 | -5.503018 | -1.964709 | -1.404493 |
| 1 | -2.122839 | -3.178153 | 0.104882  |
| 1 | -3.810381 | -4.802773 | -0.608655 |
| 1 | -5.975538 | -4.058595 | -1.556801 |
| 1 | -6.426902 | -1.632087 | -1.864496 |
| 6 | 2.475001  | -0.247398 | -0.159731 |
| 6 | 3.332401  | -1.448516 | -0.386047 |
| 6 | 3.275648  | 0.892171  | -0.662795 |
| 6 | 4.545905  | -1.039669 | -0.990212 |
| 6 | 4.525790  | 0.411888  | -1.129472 |
| 6 | 5.503093  | -1.964563 | -1.404443 |
| 6 | 5.242682  | -3.324057 | -1.242670 |
| 6 | 4.021450  | -3.743242 | -0.701522 |
| 6 | 3.063913  | -2.818068 | -0.285903 |
| 1 | 5.975640  | -4.058449 | -1.556673 |
| 1 | 3.810504  | -4.802619 | -0.608476 |
| 1 | 2.122945  | -3.177993 | 0.105015  |
| 1 | 6.426969  | -1.631946 | -1.864466 |
| 6 | 3.070092  | 2.272884  | -0.604595 |
| 6 | 4.057702  | 3.142421  | -1.069629 |
| 6 | 5.268378  | 2.653416  | -1.571039 |
| 6 | 5.512970  | 1.280008  | -1.589081 |
| 1 | 6.463306  | 0.895636  | -1.942577 |
| 1 | 6.024823  | 3.343352  | -1.927359 |
| 1 | 3.883248  | 4.211807  | -1.031104 |
| 1 | 2.166995  | 2.683942  | -0.185626 |

**B3LYP(D3)/ 6-311+g\*\*/Phe-orth rotamer/C-PCM (ACN)**

|   |           |           |           |
|---|-----------|-----------|-----------|
| 6 | 1.195378  | 0.194451  | 0.307742  |
| 6 | -0.000038 | -0.789008 | 0.082693  |
| 6 | -1.195437 | 0.194446  | 0.307816  |
| 6 | 0.703453  | 1.163206  | 1.288368  |
| 6 | -0.702154 | 2.552518  | 3.250600  |
| 6 | -0.703471 | 1.163200  | 1.288415  |
| 6 | -1.409540 | 1.850285  | 2.282994  |
| 1 | -2.490563 | 1.811880  | 2.313924  |
| 6 | 2.429322  | 0.207367  | -0.279921 |
| 6 | 3.219789  | -0.898343 | -0.889580 |
| 6 | 3.292673  | 1.417643  | -0.421353 |
| 6 | 2.995634  | -2.275237 | -1.006336 |
| 6 | 4.482098  | -0.388387 | -1.289499 |
| 6 | 3.026977  | 2.776384  | -0.224026 |
| 6 | 4.512383  | 1.047064  | -1.032162 |
| 6 | 3.985265  | -3.100158 | -1.542951 |
| 1 | 2.071476  | -2.728056 | -0.686522 |
| 6 | 5.470987  | -1.213476 | -1.818756 |
| 6 | 3.995825  | 3.724424  | -0.553828 |
| 1 | 2.079591  | 3.110232  | 0.174263  |
| 6 | 5.482521  | 1.993420  | -1.358634 |
| 6 | 5.215098  | -2.577530 | -1.952930 |
| 1 | 3.793238  | -4.162902 | -1.637140 |
| 1 | 6.429517  | -0.801860 | -2.114425 |
| 6 | 5.225039  | 3.338774  | -1.101317 |
| 1 | 3.787276  | 4.775456  | -0.388752 |
| 1 | 6.413099  | 1.690595  | -1.825566 |

|   |           |           |           |
|---|-----------|-----------|-----------|
| 1 | 5.972580  | -3.234326 | -2.365142 |
| 1 | 5.966813  | 4.090044  | -1.347352 |
| 1 | -1.238007 | 3.077799  | 4.032661  |
| 6 | -2.429379 | 0.207351  | -0.279844 |
| 6 | -3.292810 | 1.417574  | -0.421219 |
| 6 | -3.219732 | -0.898369 | -0.889612 |
| 6 | -3.027215 | 2.776324  | -0.223813 |
| 6 | -4.512496 | 1.046934  | -1.032043 |
| 6 | -2.995419 | -2.275222 | -1.006514 |
| 6 | -4.482090 | -0.388498 | -1.289482 |
| 6 | -3.996139 | 3.724307  | -0.553555 |
| 1 | -2.079855 | 3.110218  | 0.174497  |
| 6 | -5.482707 | 1.993235  | -1.358455 |
| 6 | -3.984970 | -3.100196 | -1.543194 |
| 1 | -2.071199 | -2.727963 | -0.686760 |
| 6 | -5.470898 | -1.213642 | -1.818802 |
| 6 | -5.225327 | 3.338594  | -1.101060 |
| 1 | -3.787671 | 4.775346  | -0.388417 |
| 1 | -6.413262 | 1.690368  | -1.825405 |
| 6 | -5.214867 | -2.577658 | -1.953102 |
| 1 | -3.792830 | -4.162911 | -1.637493 |
| 1 | -6.429471 | -0.802098 | -2.114433 |
| 1 | -5.967159 | 4.089822  | -1.347047 |
| 1 | -5.972283 | -3.234496 | -2.365369 |
| 6 | 0.702239  | 2.552520  | 3.250559  |
| 1 | 1.238135  | 3.077803  | 4.032590  |
| 6 | 1.409572  | 1.850291  | 2.282911  |
| 1 | 2.490597  | 1.811891  | 2.313781  |
| 6 | -0.000150 | -1.411377 | -1.342634 |
| 1 | -0.000088 | -2.500122 | -1.318405 |
| 1 | -0.870851 | -1.090119 | -1.906937 |
| 1 | 0.870376  | -1.090013 | -1.907142 |
| 6 | 0.000027  | -1.830877 | 1.239687  |
| 6 | -1.198181 | -2.297310 | 1.795650  |
| 6 | 1.198298  | -2.296837 | 1.795911  |
| 6 | -1.200823 | -3.235781 | 2.826983  |
| 1 | -2.145610 | -1.912742 | 1.446033  |
| 6 | 1.201086  | -3.235305 | 2.827246  |
| 1 | 2.145649  | -1.911882 | 1.446509  |
| 6 | 0.000171  | -3.719182 | 3.342621  |
| 1 | -2.146303 | -3.576964 | 3.233787  |
| 1 | 2.146613  | -3.576109 | 3.234260  |
| 1 | 0.000227  | -4.446404 | 4.146552  |

**B3LYP(D3)/ 6-311+g\*\*/most-stable rotamer/C-PCM(CHX )**

|   |           |           |           |
|---|-----------|-----------|-----------|
| 6 | 1.208398  | -0.274231 | 0.367454  |
| 6 | 0.000004  | 0.668009  | 0.035213  |
| 6 | -1.208511 | -0.274071 | 0.367510  |
| 6 | -0.704018 | -1.287654 | 1.284565  |
| 6 | 0.703822  | -1.287756 | 1.284523  |
| 6 | 1.408449  | -2.023471 | 2.248837  |
| 6 | 0.702750  | -2.771939 | 3.179441  |
| 6 | -0.703046 | -2.771838 | 3.179483  |
| 6 | -1.408693 | -2.023270 | 2.248919  |
| 6 | 0.000010  | 0.996030  | -1.468927 |
| 1 | 2.489074  | -1.980126 | 2.284894  |
| 1 | 1.238822  | -3.331810 | 3.937141  |
| 1 | -1.239153 | -3.331634 | 3.937214  |
| 1 | -2.489309 | -1.979772 | 2.285040  |
| 6 | 0.000163  | 1.908244  | 0.961730  |
| 1 | -0.000055 | 0.061819  | -2.031852 |
| 1 | 0.883423  | 1.560227  | -1.761089 |



|   |           |           |           |
|---|-----------|-----------|-----------|
| 1 | -0.883335 | 1.560338  | -1.761075 |
| 6 | 0.000950  | 3.210453  | 0.450054  |
| 6 | 0.001125  | 4.321424  | 1.294183  |
| 6 | 0.000521  | 4.153276  | 2.675574  |
| 6 | -0.000246 | 2.861392  | 3.201131  |
| 6 | -0.000413 | 1.755418  | 2.355468  |
| 1 | 0.001456  | 3.376698  | -0.619593 |
| 1 | 0.001741  | 5.316894  | 0.864412  |
| 1 | 0.000656  | 5.014114  | 3.334223  |
| 1 | -0.000712 | 2.710922  | 4.274932  |
| 1 | -0.001005 | 0.765877  | 2.793291  |
| 6 | -2.474866 | -0.248613 | -0.154726 |
| 6 | -3.331267 | -1.450411 | -0.382616 |
| 6 | -4.541146 | -1.042349 | -0.993629 |
| 6 | -4.521053 | 0.409127  | -1.133540 |
| 6 | -3.274517 | 0.890129  | -0.660119 |
| 6 | -3.071206 | 2.270271  | -0.594996 |
| 6 | -4.056845 | 3.139542  | -1.063469 |
| 6 | -5.262941 | 2.650336  | -1.573919 |
| 6 | -5.505857 | 1.277111  | -1.596362 |
| 1 | -6.018349 | 3.340291  | -1.932582 |
| 1 | -3.885385 | 4.209213  | -1.018541 |
| 1 | -6.454224 | 0.892540  | -1.954952 |
| 1 | -2.172652 | 2.679836  | -0.164865 |
| 6 | -3.062987 | -2.819318 | -0.280124 |
| 6 | -4.017736 | -3.745079 | -0.699609 |
| 6 | -5.235354 | -3.326810 | -1.247715 |
| 6 | -5.494773 | -1.967914 | -1.412212 |
| 1 | -2.123118 | -3.177925 | 0.114659  |
| 1 | -3.806729 | -4.804376 | -0.605305 |
| 1 | -5.966225 | -4.061671 | -1.565604 |
| 1 | -6.415775 | -1.635905 | -1.878476 |
| 6 | 2.474755  | -0.248831 | -0.154771 |
| 6 | 3.331136  | -1.450641 | -0.382663 |
| 6 | 3.274426  | 0.889904  | -0.660131 |
| 6 | 4.541038  | -1.042586 | -0.993635 |
| 6 | 4.520970  | 0.408895  | -1.133521 |
| 6 | 5.494661  | -1.968159 | -1.412208 |
| 6 | 5.235215  | -3.327054 | -1.247742 |
| 6 | 4.017575  | -3.745313 | -0.699675 |
| 6 | 3.062829  | -2.819545 | -0.280198 |
| 1 | 5.966083  | -4.061921 | -1.565622 |
| 1 | 3.806550  | -4.804609 | -0.605394 |
| 1 | 2.122945  | -3.178142 | 0.114557  |
| 1 | 6.415682  | -1.636157 | -1.878441 |
| 6 | 3.071110  | 2.270047  | -0.595009 |
| 6 | 4.056770  | 3.139315  | -1.063443 |
| 6 | 5.262882  | 2.650106  | -1.573854 |
| 6 | 5.505794  | 1.276879  | -1.596303 |
| 1 | 6.454169  | 0.892307  | -1.954869 |
| 1 | 6.018305  | 3.340060  | -1.932487 |
| 1 | 3.885312  | 4.208987  | -1.018519 |
| 1 | 2.172533  | 2.679611  | -0.164916 |

**B3LYP(D3)/ 6-311+g\*\*/Phe-orth rotamer/C-PCM (CHX)**

|   |           |           |          |
|---|-----------|-----------|----------|
| 6 | 1.208398  | -0.274231 | 0.367454 |
| 6 | 0.000004  | 0.668009  | 0.035213 |
| 6 | -1.208511 | -0.274071 | 0.367510 |
| 6 | -0.704018 | -1.287654 | 1.284565 |
| 6 | 0.703822  | -1.287756 | 1.284523 |
| 6 | 1.408449  | -2.023471 | 2.248837 |

|   |           |           |           |
|---|-----------|-----------|-----------|
| 6 | 0.702750  | -2.771939 | 3.179441  |
| 6 | -0.703046 | -2.771838 | 3.179483  |
| 6 | -1.408693 | -2.023270 | 2.248919  |
| 6 | 0.000010  | 0.996030  | -1.468927 |
| 1 | 2.489074  | -1.980126 | 2.284894  |
| 1 | 1.238822  | -3.331810 | 3.937141  |
| 1 | -1.239153 | -3.331634 | 3.937214  |
| 1 | -2.489309 | -1.979772 | 2.285040  |
| 6 | 0.000163  | 1.908244  | 0.961730  |
| 1 | -0.000055 | 0.061819  | -2.031852 |
| 1 | 0.883423  | 1.560227  | -1.761089 |
| 1 | -0.883335 | 1.560338  | -1.761075 |
| 6 | 0.000950  | 3.210453  | 0.450054  |
| 6 | 0.001125  | 4.321424  | 1.294183  |
| 6 | 0.000521  | 4.153276  | 2.675574  |
| 6 | -0.000246 | 2.861392  | 3.201131  |
| 6 | -0.000413 | 1.755418  | 2.355468  |
| 1 | 0.001456  | 3.376698  | -0.619593 |
| 1 | 0.001741  | 5.316894  | 0.864412  |
| 1 | 0.000656  | 5.014114  | 3.334223  |
| 1 | -0.000712 | 2.710922  | 4.274932  |
| 1 | -0.001005 | 0.765877  | 2.793291  |
| 6 | -2.474866 | -0.248613 | -0.154726 |
| 6 | -3.331267 | -1.450411 | -0.382616 |
| 6 | -4.541146 | -1.042349 | -0.993629 |
| 6 | -4.521053 | 0.409127  | -1.133540 |
| 6 | -3.274517 | 0.890129  | -0.660119 |
| 6 | -3.071206 | 2.270271  | -0.594996 |
| 6 | -4.056845 | 3.139542  | -1.063469 |
| 6 | -5.262941 | 2.650336  | -1.573919 |
| 6 | -5.505857 | 1.277111  | -1.596362 |
| 1 | -6.018349 | 3.340291  | -1.932582 |
| 1 | -3.885385 | 4.209213  | -1.018541 |
| 1 | -6.454224 | 0.892540  | -1.954952 |
| 1 | -2.172652 | 2.679836  | -0.164865 |
| 6 | -3.062987 | -2.819318 | -0.280124 |
| 6 | -4.017736 | -3.745079 | -0.699609 |
| 6 | -5.235354 | -3.326810 | -1.247715 |
| 6 | -5.494773 | -1.967914 | -1.412212 |
| 1 | -2.123118 | -3.177925 | 0.114659  |
| 1 | -3.806729 | -4.804376 | -0.605305 |
| 1 | -5.966225 | -4.061671 | -1.565604 |
| 1 | -6.415775 | -1.635905 | -1.878476 |
| 6 | 2.474755  | -0.248831 | -0.154771 |
| 6 | 3.331136  | -1.450641 | -0.382663 |
| 6 | 3.274426  | 0.889904  | -0.660131 |
| 6 | 4.541038  | -1.042586 | -0.993635 |
| 6 | 4.520970  | 0.408895  | -1.133521 |
| 6 | 5.494661  | -1.968159 | -1.412208 |
| 6 | 5.235215  | -3.327054 | -1.247742 |
| 6 | 4.017575  | -3.745313 | -0.699675 |
| 6 | 3.062829  | -2.819545 | -0.280198 |
| 1 | 5.966083  | -4.061921 | -1.565622 |
| 1 | 3.806550  | -4.804609 | -0.605394 |
| 1 | 2.122945  | -3.178142 | 0.114557  |
| 1 | 6.415682  | -1.636157 | -1.878441 |
| 6 | 3.071110  | 2.270047  | -0.595009 |
| 6 | 4.056770  | 3.139315  | -1.063443 |
| 6 | 5.262882  | 2.650106  | -1.573854 |
| 6 | 5.505794  | 1.276879  | -1.596303 |
| 1 | 6.454169  | 0.892307  | -1.954869 |
| 1 | 6.018305  | 3.340060  | -1.932487 |
| 1 | 3.885312  | 4.208987  | -1.018519 |
| 1 | 2.172533  | 2.679611  | -0.164916 |

**PBE0(D3)/ 6-311+g\*\*/most-stable rotamer/C-PCM(ACN )**

|   |           |           |           |
|---|-----------|-----------|-----------|
| 6 | 1.199740  | -0.278990 | 0.348897  |
| 6 | 0.000001  | 0.659182  | 0.034476  |
| 6 | -1.199734 | -0.278999 | 0.348891  |
| 6 | -0.701826 | -1.304113 | 1.250553  |
| 6 | 0.701834  | -1.304107 | 1.250560  |
| 6 | 1.406684  | -2.048196 | 2.202839  |
| 6 | 0.701112  | -2.805273 | 3.121925  |
| 6 | -0.701113 | -2.805279 | 3.121917  |
| 6 | -1.406681 | -2.048207 | 2.202825  |
| 6 | 0.000008  | 1.018574  | -1.452611 |
| 1 | 2.488721  | -2.003362 | 2.242978  |
| 1 | 1.236827  | -3.373542 | 3.874877  |
| 1 | -1.236831 | -3.373554 | 3.874864  |
| 1 | -2.488719 | -2.003382 | 2.242950  |
| 6 | -0.000006 | 1.870994  | 0.985018  |
| 1 | 0.000011  | 0.095896  | -2.036336 |
| 1 | 0.883931  | 1.590820  | -1.733228 |
| 1 | -0.883911 | 1.590820  | -1.733238 |
| 6 | -0.000062 | 3.180050  | 0.500615  |
| 6 | -0.000067 | 4.270509  | 1.366294  |
| 6 | -0.000017 | 4.072367  | 2.740709  |
| 6 | 0.000037  | 2.772497  | 3.238258  |
| 6 | 0.000042  | 1.686690  | 2.371593  |
| 1 | -0.000103 | 3.367321  | -0.567983 |
| 1 | -0.000110 | 5.275522  | 0.957072  |
| 1 | -0.000021 | 4.919724  | 3.418256  |
| 1 | 0.000076  | 2.599254  | 4.309645  |
| 1 | 0.000086  | 0.685634  | 2.788100  |
| 6 | -2.465065 | -0.242388 | -0.168474 |
| 6 | -3.325395 | -1.433332 | -0.391994 |
| 6 | -4.534983 | -1.018475 | -0.988763 |
| 6 | -4.507093 | 0.429452  | -1.124800 |
| 6 | -3.256067 | 0.898923  | -0.664847 |
| 6 | -3.040466 | 2.274726  | -0.603520 |
| 6 | -4.021520 | 3.149031  | -1.062006 |
| 6 | -5.234134 | 2.670179  | -1.558567 |
| 6 | -5.488371 | 1.302408  | -1.577975 |
| 1 | -5.987731 | 3.366793  | -1.911071 |
| 1 | -3.839959 | 4.218234  | -1.021609 |
| 1 | -6.443977 | 0.925143  | -1.928579 |
| 1 | -2.130771 | 2.678821  | -0.184461 |
| 6 | -3.062646 | -2.800944 | -0.296965 |
| 6 | -4.024649 | -3.717228 | -0.709150 |
| 6 | -5.243390 | -3.291804 | -1.241606 |
| 6 | -5.497222 | -1.934525 | -1.399730 |
| 1 | -2.119484 | -3.166859 | 0.088559  |
| 1 | -3.818162 | -4.778885 | -0.620202 |
| 1 | -5.982154 | -4.022716 | -1.553696 |
| 1 | -6.422403 | -1.596009 | -1.855644 |
| 6 | 2.465070  | -0.242376 | -0.168470 |
| 6 | 3.325406  | -1.433317 | -0.391988 |
| 6 | 3.256064  | 0.898935  | -0.664859 |
| 6 | 4.534996  | -1.018457 | -0.988749 |
| 6 | 4.507097  | 0.429468  | -1.124797 |
| 6 | 5.497242  | -1.934505 | -1.399705 |
| 6 | 5.243414  | -3.291783 | -1.241582 |
| 6 | 4.024669  | -3.717212 | -0.709138 |
| 6 | 3.062659  | -2.800930 | -0.296962 |
| 1 | 5.982183  | -4.022694 | -1.553665 |
| 1 | 3.818184  | -4.778869 | -0.620192 |

|   |          |           |           |
|---|----------|-----------|-----------|
| 1 | 2.119494 | -3.166848 | 0.088552  |
| 1 | 6.422425 | -1.595986 | -1.855613 |
| 6 | 3.040448 | 2.274737  | -0.603561 |
| 6 | 4.021497 | 3.149043  | -1.062054 |
| 6 | 5.234121 | 2.670195  | -1.558596 |
| 6 | 5.488371 | 1.302426  | -1.577978 |
| 1 | 6.443982 | 0.925164  | -1.928572 |
| 1 | 5.987715 | 3.366810  | -1.911105 |
| 1 | 3.839925 | 4.218245  | -1.021679 |
| 1 | 2.130745 | 2.678832  | -0.184520 |

**PBE0(D3)/ 6-311+g\*\*/ Phe-orth rotamer/C-PCM(ACN )**

|   |           |           |           |
|---|-----------|-----------|-----------|
| 6 | 1.187443  | 0.205062  | 0.298944  |
| 6 | 0.000015  | -0.771135 | 0.088170  |
| 6 | -1.187009 | 0.205374  | 0.298973  |
| 6 | 0.701744  | 1.189044  | 1.260517  |
| 6 | -0.699736 | 2.607726  | 3.192079  |
| 6 | -0.701078 | 1.189007  | 1.260782  |
| 6 | -1.407011 | 1.890931  | 2.240028  |
| 1 | -2.489606 | 1.850973  | 2.273242  |
| 6 | 2.420292  | 0.201958  | -0.284763 |
| 6 | 3.196922  | -0.912460 | -0.878828 |
| 6 | 3.288509  | 1.398434  | -0.434861 |
| 6 | 2.961247  | -2.285782 | -0.973464 |
| 6 | 4.459210  | -0.419745 | -1.282853 |
| 6 | 3.032635  | 2.757223  | -0.249406 |
| 6 | 4.500943  | 1.014220  | -1.041232 |
| 6 | 3.941326  | -3.123127 | -1.498331 |
| 1 | 2.031796  | -2.726154 | -0.643490 |
| 6 | 5.438963  | -1.257264 | -1.800800 |
| 6 | 4.006724  | 3.691597  | -0.586601 |
| 1 | 2.085687  | 3.101900  | 0.146112  |
| 6 | 5.476567  | 1.947166  | -1.375363 |
| 6 | 5.171402  | -2.616967 | -1.916140 |
| 1 | 3.741207  | -4.186682 | -1.576907 |
| 1 | 6.402141  | -0.857663 | -2.102174 |
| 6 | 5.229726  | 3.292699  | -1.129190 |
| 1 | 3.806288  | 4.746674  | -0.430788 |
| 1 | 6.405776  | 1.633119  | -1.840401 |
| 1 | 5.923549  | -3.286354 | -2.320533 |
| 1 | 5.977850  | 4.037027  | -1.381571 |
| 1 | -1.235388 | 3.146398  | 3.966612  |
| 6 | -2.419750 | 0.202455  | -0.284890 |
| 6 | -3.288428 | 1.398727  | -0.434475 |
| 6 | -3.195680 | -0.911832 | -0.880003 |
| 6 | -3.033133 | 2.757581  | -0.248619 |
| 6 | -4.500776 | 1.014235  | -1.040859 |
| 6 | -2.958913 | -2.284830 | -0.976376 |
| 6 | -4.458302 | -0.419549 | -1.283451 |
| 6 | -4.007699 | 3.691638  | -0.585305 |
| 1 | -2.086287 | 3.102587  | 0.146831  |
| 6 | -5.476896 | 1.946861  | -1.374450 |
| 6 | -3.938470 | -3.122320 | -1.501989 |
| 1 | -2.028950 | -2.724840 | -0.647314 |
| 6 | -5.437552 | -1.257222 | -1.802093 |
| 6 | -5.230641 | 3.292404  | -1.127784 |
| 1 | -3.807683 | 4.746747  | -0.429168 |
| 1 | -6.406007 | 1.632569  | -1.839518 |
| 6 | -5.169043 | -2.616619 | -1.918905 |
| 1 | -3.737516 | -4.185619 | -1.581889 |
| 1 | -6.401020 | -0.857957 | -2.102985 |
| 1 | -5.979143 | 4.036492  | -1.379752 |

|   |           |           |           |
|---|-----------|-----------|-----------|
| 1 | -5.920770 | -3.286112 | -2.323900 |
| 6 | 0.700975  | 2.607929  | 3.191712  |
| 1 | 1.236872  | 3.146753  | 3.965970  |
| 6 | 1.407970  | 1.891258  | 2.239360  |
| 1 | 2.490582  | 1.851474  | 2.272158  |
| 6 | -0.000654 | -1.410783 | -1.318024 |
| 1 | -0.001987 | -2.500468 | -1.280322 |
| 1 | -0.873540 | -1.095355 | -1.886084 |
| 1 | 0.872925  | -1.097492 | -1.886155 |
| 6 | -0.000774 | -1.783506 | 1.258171  |
| 6 | -1.197506 | -2.236925 | 1.818902  |
| 6 | 1.194836  | -2.236153 | 1.821921  |
| 6 | -1.200833 | -3.152676 | 2.865721  |
| 1 | -2.145030 | -1.856867 | 1.456531  |
| 6 | 1.196074  | -3.151904 | 2.868761  |
| 1 | 2.143042  | -1.855610 | 1.461885  |
| 6 | -0.002887 | -3.624080 | 3.390220  |
| 1 | -2.147372 | -3.486468 | 3.278848  |
| 1 | 2.141775  | -3.485112 | 3.284274  |
| 1 | -0.003698 | -4.335857 | 4.209242  |

**PBEPBE (D3)/ 6-311+g\*\*/ Phe-orth rotamer/C-PCM(ACN )**

|   |           |           |           |
|---|-----------|-----------|-----------|
| 6 | 1.195702  | 0.194471  | 0.320848  |
| 6 | 0.000151  | -0.784001 | 0.086631  |
| 6 | -1.195789 | 0.194189  | 0.320529  |
| 6 | 0.708728  | 1.162696  | 1.301004  |
| 6 | -0.706393 | 2.570618  | 3.261915  |
| 6 | -0.709334 | 1.162716  | 1.300593  |
| 6 | -1.418666 | 1.861706  | 2.294252  |
| 1 | -2.508847 | 1.823578  | 2.326475  |
| 6 | 2.440012  | 0.202976  | -0.275251 |
| 6 | 3.222637  | -0.903686 | -0.886349 |
| 6 | 3.296008  | 1.414795  | -0.423697 |
| 6 | 2.994706  | -2.287558 | -0.998194 |
| 6 | 4.489870  | -0.392273 | -1.300426 |
| 6 | 3.025715  | 2.778741  | -0.223236 |
| 6 | 4.519575  | 1.045075  | -1.047785 |
| 6 | 3.983869  | -3.118194 | -1.541645 |
| 1 | 2.062427  | -2.741027 | -0.668804 |
| 6 | 5.477746  | -1.225799 | -1.835476 |
| 6 | 3.992567  | 3.733743  | -0.563190 |
| 1 | 2.072065  | 3.111262  | 0.187310  |
| 6 | 5.486896  | 2.000613  | -1.383613 |
| 6 | 5.216829  | -2.595705 | -1.963624 |
| 1 | 3.788281  | -4.189136 | -1.632838 |
| 1 | 6.443249  | -0.815087 | -2.141634 |
| 6 | 5.224281  | 3.350530  | -1.122470 |
| 1 | 3.779956  | 4.792305  | -0.395882 |
| 1 | 6.422649  | 1.700749  | -1.862291 |
| 1 | 5.976144  | -3.260048 | -2.382622 |
| 1 | 5.967041  | 4.110559  | -1.375888 |
| 1 | -1.245697 | 3.103749  | 4.048046  |
| 6 | -2.440067 | 0.202458  | -0.275631 |
| 6 | -3.296219 | 1.414186  | -0.423458 |
| 6 | -3.222802 | -0.904203 | -0.886595 |
| 6 | -3.026050 | 2.778012  | -0.222099 |
| 6 | -4.519703 | 1.044650  | -1.047776 |
| 6 | -2.995090 | -2.288124 | -0.998305 |
| 6 | -4.490012 | -0.392659 | -1.300669 |
| 6 | -3.992897 | 3.733124  | -0.561752 |
| 1 | -2.072512 | 3.110318  | 0.188917  |

|   |           |           |           |
|---|-----------|-----------|-----------|
| 6 | -5.486990 | 2.000308  | -1.383363 |
| 6 | -3.984390 | -3.118659 | -1.541675 |
| 1 | -2.062865 | -2.741730 | -0.668937 |
| 6 | -5.478002 | -1.226087 | -1.835650 |
| 6 | -5.224453 | 3.350118  | -1.121551 |
| 1 | -3.780411 | 4.791609  | -0.393804 |
| 1 | -6.422673 | 1.700615  | -1.862284 |
| 6 | -5.217272 | -2.596040 | -1.963712 |
| 1 | -3.788939 | -4.189635 | -1.632772 |
| 1 | -6.443486 | -0.815265 | -2.141718 |
| 1 | -5.967202 | 4.110237  | -1.374726 |
| 1 | -5.976689 | -3.260315 | -2.382633 |
| 6 | 0.704507  | 2.570418  | 3.262485  |
| 1 | 1.243318  | 3.103425  | 4.049039  |
| 6 | 1.417396  | 1.861421  | 2.295330  |
| 1 | 2.507540  | 1.823132  | 2.328413  |
| 6 | 0.000610  | -1.407299 | -1.337101 |
| 1 | 0.001387  | -2.504672 | -1.313890 |
| 1 | -0.879652 | -1.084104 | -1.903829 |
| 1 | 0.880516  | -1.082877 | -1.903723 |
| 6 | 0.000551  | -1.824967 | 1.247616  |
| 6 | -1.203806 | -2.291944 | 1.806019  |
| 6 | 1.205348  | -2.290375 | 1.806319  |
| 6 | -1.205408 | -3.232599 | 2.843341  |
| 1 | -2.158098 | -1.902180 | 1.449823  |
| 6 | 1.207899  | -3.230991 | 2.843677  |
| 1 | 2.159234  | -1.899382 | 1.450347  |
| 6 | 0.001500  | -3.716358 | 3.361529  |
| 1 | -2.157920 | -3.575814 | 3.254659  |
| 1 | 2.160755  | -3.572890 | 3.255295  |
| 1 | 0.001880  | -4.447624 | 4.173182  |

**PBEPBE(D3)/ 6-311+g\*\*/most-stable rotamer/C-PCM(ACN )**

|   |           |           |           |
|---|-----------|-----------|-----------|
| 6 | 1.209068  | -0.276563 | 0.373475  |
| 6 | -0.000369 | 0.656657  | 0.028660  |
| 6 | -1.208679 | -0.277019 | 0.373303  |
| 6 | -0.709378 | -1.289501 | 1.289637  |
| 6 | 0.710216  | -1.289132 | 1.289824  |
| 6 | 1.417741  | -2.038983 | 2.251449  |
| 6 | 0.706481  | -2.795725 | 3.179873  |
| 6 | -0.706140 | -2.795843 | 3.179867  |
| 6 | -1.417222 | -2.039233 | 2.251220  |
| 6 | -0.000270 | 0.983841  | -1.475701 |
| 1 | 2.507591  | -1.996674 | 2.288406  |
| 1 | 1.245663  | -3.365143 | 3.940448  |
| 1 | -1.245147 | -3.365271 | 3.940538  |
| 1 | -2.507051 | -1.996476 | 2.287708  |
| 6 | -0.000724 | 1.901903  | 0.953762  |
| 1 | -0.001102 | 0.042982  | -2.043546 |
| 1 | 0.892068  | 1.551922  | -1.769244 |
| 1 | -0.891712 | 1.553520  | -1.768831 |
| 6 | 0.000708  | 3.207469  | 0.431370  |
| 6 | 0.000382  | 4.327529  | 1.273794  |
| 6 | -0.001449 | 4.164683  | 2.662103  |
| 6 | -0.003019 | 2.870043  | 3.196707  |
| 6 | -0.002675 | 1.754336  | 2.353741  |
| 1 | 0.001715  | 3.365163  | -0.649293 |
| 1 | 0.001567  | 5.328579  | 0.835602  |
| 1 | -0.001779 | 5.035503  | 3.321568  |
| 1 | -0.004572 | 2.724071  | 4.279666  |
| 1 | -0.003924 | 0.757682  | 2.798807  |
| 6 | -2.488936 | -0.245283 | -0.150847 |
| 6 | -3.337071 | -1.448277 | -0.384279 |

|   |           |           |           |
|---|-----------|-----------|-----------|
| 6 | -4.556598 | -1.040053 | -0.996771 |
| 6 | -4.540071 | 0.413281  | -1.128160 |
| 6 | -3.285380 | 0.894865  | -0.649674 |
| 6 | -3.078224 | 2.281422  | -0.580350 |
| 6 | -4.067484 | 3.156800  | -1.046598 |
| 6 | -5.280246 | 2.668746  | -1.559608 |
| 6 | -5.527734 | 1.290214  | -1.587414 |
| 1 | -6.040471 | 3.366771  | -1.918147 |
| 1 | -3.893251 | 4.234460  | -0.997981 |
| 1 | -6.485482 | 0.907596  | -1.949593 |
| 1 | -2.168932 | 2.691301  | -0.145962 |
| 6 | -3.060405 | -2.822469 | -0.287024 |
| 6 | -4.014512 | -3.754719 | -0.712563 |
| 6 | -5.239882 | -3.338259 | -1.260729 |
| 6 | -5.508532 | -1.974365 | -1.421086 |
| 1 | -2.110583 | -3.180046 | 0.111639  |
| 1 | -3.796408 | -4.821572 | -0.622472 |
| 1 | -5.972626 | -4.081506 | -1.583658 |
| 1 | -6.438900 | -1.644449 | -1.890529 |
| 6 | 2.489108  | -0.244622 | -0.151052 |
| 6 | 3.337550  | -1.447629 | -0.383915 |
| 6 | 3.285541  | 0.895457  | -0.650114 |
| 6 | 4.557008  | -1.039488 | -0.996679 |
| 6 | 4.540320  | 0.413822  | -1.128565 |
| 6 | 5.509123  | -1.973983 | -1.420296 |
| 6 | 5.240848  | -3.337793 | -1.258543 |
| 6 | 4.015578  | -3.754117 | -0.710035 |
| 6 | 3.061153  | -2.821700 | -0.285520 |
| 1 | 5.973902  | -4.081160 | -1.580506 |
| 1 | 3.797915  | -4.820961 | -0.618861 |
| 1 | 2.111050  | -3.178932 | 0.112777  |
| 1 | 6.439256  | -1.644411 | -1.890466 |
| 6 | 3.078387  | 2.282012  | -0.580950 |
| 6 | 4.067685  | 3.157383  | -1.047141 |
| 6 | 5.280476  | 2.669334  | -1.559948 |
| 6 | 5.527998  | 1.290746  | -1.587644 |
| 1 | 6.485922  | 0.908251  | -1.949512 |
| 1 | 6.040808  | 3.367268  | -1.918424 |
| 1 | 3.893334  | 4.235035  | -0.998761 |
| 1 | 2.168927  | 2.691777  | -0.146840 |

**Cam-B3LYP(D3)/ 6-311+g\*\*/meta-stable product/C-PCM(ACN)**

|   |           |           |           |
|---|-----------|-----------|-----------|
| 6 | -1.327196 | 0.487886  | 0.141660  |
| 6 | -0.074624 | -0.379602 | 0.422592  |
| 6 | 1.085218  | 0.667077  | 0.507974  |
| 6 | -0.864024 | 1.854837  | -0.094328 |
| 6 | 0.393795  | 4.332026  | -0.192744 |
| 6 | 0.505887  | 1.962628  | 0.182316  |
| 6 | 1.106427  | 3.226272  | 0.224533  |
| 1 | 2.125902  | 3.335947  | 0.566315  |
| 6 | -2.625001 | 0.075718  | 0.195167  |
| 6 | -3.187724 | -1.285978 | -0.046072 |
| 6 | -3.821822 | 0.927889  | 0.467688  |
| 6 | -2.601637 | -2.514944 | -0.343079 |
| 6 | -4.594342 | -1.197006 | -0.069145 |
| 6 | -3.942808 | 2.191230  | 1.043244  |
| 6 | -4.985920 | 0.162936  | 0.288514  |
| 6 | -3.403149 | -3.614004 | -0.632845 |
| 1 | -1.532536 | -2.645013 | -0.355044 |
| 6 | -5.393102 | -2.289351 | -0.369425 |
| 6 | -5.202831 | 2.706367  | 1.319868  |
| 1 | -3.072827 | 2.780239  | 1.292830  |

|   |           |           |           |
|---|-----------|-----------|-----------|
| 6 | -6.247400 | 0.677943  | 0.553084  |
| 6 | -4.789754 | -3.508014 | -0.650083 |
| 1 | -2.933872 | -4.566072 | -0.850233 |
| 1 | -6.472575 | -2.194801 | -0.385503 |
| 6 | -6.353528 | 1.968061  | 1.052827  |
| 1 | -5.287261 | 3.693531  | 1.758250  |
| 1 | -7.134033 | 0.073140  | 0.402801  |
| 1 | -5.397177 | -4.374284 | -0.882972 |
| 1 | -7.328387 | 2.388552  | 1.268404  |
| 1 | 0.856983  | 5.310963  | -0.175662 |
| 6 | 2.430269  | 0.430744  | 0.618713  |
| 6 | 3.154553  | -0.587550 | 1.415312  |
| 6 | 3.487523  | 1.073615  | -0.222349 |
| 6 | 2.777046  | -1.325320 | 2.536777  |
| 6 | 4.516253  | -0.581294 | 1.053110  |
| 6 | 3.414714  | 1.963655  | -1.295325 |
| 6 | 4.711394  | 0.415459  | 0.007719  |
| 6 | 3.708395  | -2.128729 | 3.183728  |
| 1 | 1.782505  | -1.259068 | 2.943548  |
| 6 | 5.448370  | -1.379387 | 1.699760  |
| 6 | 4.550777  | 2.246268  | -2.041513 |
| 1 | 2.487082  | 2.443298  | -1.568019 |
| 6 | 5.848339  | 0.697749  | -0.738141 |
| 6 | 5.032878  | -2.177036 | 2.757421  |
| 1 | 3.399496  | -2.709262 | 4.044844  |
| 1 | 6.490466  | -1.363292 | 1.402348  |
| 6 | 5.769751  | 1.633380  | -1.758228 |
| 1 | 4.482007  | 2.951720  | -2.861108 |
| 1 | 6.778553  | 0.177532  | -0.541108 |
| 1 | 5.745922  | -2.807288 | 3.275128  |
| 1 | 6.646064  | 1.869514  | -2.349745 |
| 6 | -0.913598 | 4.187349  | -0.668440 |
| 1 | -1.443515 | 5.047431  | -1.059222 |
| 6 | -1.546411 | 2.960914  | -0.611406 |
| 1 | -2.564740 | 2.867558  | -0.957792 |
| 6 | -0.343100 | -1.177683 | 1.709549  |
| 1 | -1.331254 | -1.628024 | 1.681913  |
| 1 | 0.373019  | -1.976261 | 1.862790  |
| 1 | -0.310392 | -0.510488 | 2.571910  |
| 6 | 0.308945  | -1.245335 | -0.796177 |
| 6 | 1.063631  | -2.410098 | -0.659322 |
| 6 | -0.039594 | -0.839214 | -2.083904 |
| 6 | 1.439368  | -3.153026 | -1.771258 |
| 1 | 1.367954  | -2.758165 | 0.317812  |
| 6 | 0.337478  | -1.577888 | -3.197589 |
| 1 | -0.624156 | 0.060934  | -2.227315 |
| 6 | 1.077254  | -2.742543 | -3.047002 |
| 1 | 2.018222  | -4.058990 | -1.635250 |
| 1 | 0.046153  | -1.241267 | -4.185569 |
| 1 | 1.368189  | -3.324094 | -3.913443 |

**Cam-B3LYP(D3)/ 6-311+g\*\*/meta-stable product/C-PCM(CHX)**

|   |           |           |           |
|---|-----------|-----------|-----------|
| 6 | -1.326629 | 0.485319  | 0.126938  |
| 6 | -0.075508 | -0.384985 | 0.398769  |
| 6 | 1.087158  | 0.658307  | 0.484266  |
| 6 | -0.859772 | 1.848784  | -0.120529 |
| 6 | 0.406325  | 4.318812  | -0.256075 |
| 6 | 0.513029  | 1.952871  | 0.142763  |
| 6 | 1.118333  | 3.214820  | 0.166022  |
| 1 | 2.141237  | 3.323262  | 0.497505  |
| 6 | -2.625402 | 0.078913  | 0.192323  |
| 6 | -3.196524 | -1.279456 | -0.044834 |
| 6 | -3.814274 | 0.936237  | 0.480860  |



|   |           |           |           |
|---|-----------|-----------|-----------|
| 6 | -2.618477 | -2.506730 | -0.362392 |
| 6 | -4.602565 | -1.185792 | -0.043231 |
| 6 | -3.920655 | 2.200623  | 1.056018  |
| 6 | -4.983419 | 0.175170  | 0.321642  |
| 6 | -3.427810 | -3.601728 | -0.643152 |
| 1 | -1.549883 | -2.637178 | -0.400799 |
| 6 | -5.408648 | -2.274487 | -0.334295 |
| 6 | -5.173596 | 2.721229  | 1.352077  |
| 1 | -3.043456 | 2.785165  | 1.290806  |
| 6 | -6.237534 | 0.695959  | 0.606378  |
| 6 | -4.813669 | -3.492686 | -0.632110 |
| 1 | -2.964767 | -4.552585 | -0.878169 |
| 1 | -6.487986 | -2.177011 | -0.331645 |
| 6 | -6.330687 | 1.986841  | 1.105485  |
| 1 | -5.247307 | 3.709118  | 1.790840  |
| 1 | -7.128871 | 0.094362  | 0.471996  |
| 1 | -5.427376 | -4.356211 | -0.858808 |
| 1 | -7.300301 | 2.411146  | 1.336782  |
| 1 | 0.874313  | 5.295761  | -0.253443 |
| 6 | 2.430151  | 0.420568  | 0.611084  |
| 6 | 3.147188  | -0.582299 | 1.433971  |
| 6 | 3.495904  | 1.051966  | -0.226836 |
| 6 | 2.758651  | -1.302019 | 2.563001  |
| 6 | 4.513556  | -0.574731 | 1.091016  |
| 6 | 3.431228  | 1.918415  | -1.318682 |
| 6 | 4.718987  | 0.404984  | 0.031949  |
| 6 | 3.684514  | -2.089150 | 3.236635  |
| 1 | 1.758373  | -1.232856 | 2.954749  |
| 6 | 5.439734  | -1.356305 | 1.764495  |
| 6 | 4.575260  | 2.194295  | -2.054067 |
| 1 | 2.502502  | 2.381733  | -1.615161 |
| 6 | 5.863555  | 0.679924  | -0.703693 |
| 6 | 5.014371  | -2.137794 | 2.829595  |
| 1 | 3.367040  | -2.655310 | 4.104242  |
| 1 | 6.485807  | -1.338638 | 1.481564  |
| 6 | 5.793557  | 1.595589  | -1.741671 |
| 1 | 4.513191  | 2.881166  | -2.889806 |
| 1 | 6.793558  | 0.167968  | -0.485298 |
| 1 | 5.723541  | -2.754691 | 3.368307  |
| 1 | 6.676337  | 1.825361  | -2.326048 |
| 6 | -0.906625 | 4.175709  | -0.716212 |
| 1 | -1.436962 | 5.034192  | -1.110280 |
| 6 | -1.543485 | 2.952789  | -0.640438 |
| 1 | -2.566207 | 2.858506  | -0.973906 |
| 6 | -0.339525 | -1.194265 | 1.679181  |
| 1 | -1.323309 | -1.653570 | 1.646263  |
| 1 | 0.385392  | -1.986275 | 1.826886  |
| 1 | -0.315896 | -0.532319 | 2.546082  |
| 6 | 0.303192  | -1.246242 | -0.824854 |
| 6 | 1.094369  | -2.387332 | -0.695330 |
| 6 | -0.086359 | -0.862215 | -2.106732 |
| 6 | 1.464727  | -3.129626 | -1.808443 |
| 1 | 1.437283  | -2.712006 | 0.277187  |
| 6 | 0.285247  | -1.600929 | -3.221851 |
| 1 | -0.701036 | 0.018567  | -2.243148 |
| 6 | 1.060456  | -2.742170 | -3.078426 |
| 1 | 2.075436  | -4.015308 | -1.678460 |
| 1 | -0.038821 | -1.282399 | -4.205566 |
| 1 | 1.348187  | -3.323053 | -3.946367 |

Cam-B3LYP(D3)/6-311+g\*\*/Excited State/C-PCM(ACN)

|   |           |           |           |
|---|-----------|-----------|-----------|
| 6 | 1.194971  | 0.205481  | 0.354773  |
| 6 | -0.000120 | -0.732442 | 0.052082  |
| 6 | -1.194978 | 0.205860  | 0.354544  |
| 6 | 0.723033  | 1.137207  | 1.292295  |
| 6 | -0.713914 | 2.684438  | 3.126653  |
| 6 | -0.722993 | 1.137651  | 1.291881  |
| 6 | -1.421218 | 1.930503  | 2.236267  |
| 1 | -2.501930 | 1.904030  | 2.270624  |
| 6 | 2.474556  | 0.188498  | -0.233347 |
| 6 | 3.251952  | -0.917141 | -0.792624 |
| 6 | 3.290212  | 1.386228  | -0.428725 |
| 6 | 2.997976  | -2.286900 | -0.940864 |
| 6 | 4.515640  | -0.421345 | -1.211556 |
| 6 | 2.995634  | 2.746569  | -0.281554 |
| 6 | 4.533387  | 1.017736  | -0.997653 |
| 6 | 3.968628  | -3.115451 | -1.485864 |
| 1 | 2.057697  | -2.722559 | -0.644964 |
| 6 | 5.482313  | -1.254019 | -1.745586 |
| 6 | 3.953295  | 3.693836  | -0.615706 |
| 1 | 2.029372  | 3.073373  | 0.074632  |
| 6 | 5.487555  | 1.965428  | -1.322643 |
| 6 | 5.206155  | -2.611146 | -1.883340 |
| 1 | 3.757176  | -4.171717 | -1.601181 |
| 1 | 6.441287  | -0.855260 | -2.055849 |
| 6 | 5.199243  | 3.311942  | -1.114335 |
| 1 | 3.723815  | 4.745815  | -0.495312 |
| 1 | 6.437571  | 1.668692  | -1.751998 |
| 1 | 5.951915  | -3.276136 | -2.301844 |
| 1 | 5.934631  | 4.067063  | -1.364514 |
| 1 | -1.237358 | 3.271737  | 3.871101  |
| 6 | -2.474608 | 0.188858  | -0.233455 |
| 6 | -3.290011 | 1.386571  | -0.429420 |
| 6 | -3.252225 | -0.917009 | -0.791796 |
| 6 | -2.995289 | 2.746878  | -0.282298 |
| 6 | -4.533028 | 1.018070  | -0.998714 |
| 6 | -2.998664 | -2.287025 | -0.938286 |
| 6 | -4.515575 | -0.421168 | -1.211701 |
| 6 | -3.952637 | 3.694211  | -0.617158 |
| 1 | -2.029162 | 3.073554  | 0.074418  |
| 6 | -5.486851 | 1.965851  | -1.324448 |
| 6 | -3.969347 | -3.115793 | -1.482897 |
| 1 | -2.058732 | -2.722668 | -0.641205 |
| 6 | -5.482263 | -1.254060 | -1.745362 |
| 6 | -5.198373 | 3.312380  | -1.116392 |
| 1 | -3.723083 | 4.746184  | -0.496847 |
| 1 | -6.436759 | 1.669167  | -1.754079 |
| 6 | -5.206467 | -2.611425 | -1.881603 |
| 1 | -3.758274 | -4.172277 | -1.596905 |
| 1 | -6.441000 | -0.855331 | -2.056394 |
| 1 | -5.933515 | 4.067560  | -1.367114 |
| 1 | -5.952259 | -3.276592 | -2.299768 |
| 6 | 0.713745  | 2.683829  | 3.127224  |
| 1 | 1.237091  | 3.270692  | 3.872084  |
| 6 | 1.421135  | 1.929391  | 2.237318  |
| 1 | 2.501797  | 1.902144  | 2.272461  |
| 6 | -0.000097 | -1.301853 | -1.382687 |
| 1 | 0.000766  | -2.390214 | -1.397816 |
| 1 | -0.875061 | -0.963746 | -1.932461 |
| 1 | 0.873927  | -0.962290 | -1.933053 |
| 6 | -0.000182 | -1.810995 | 1.185875  |
| 6 | -1.191280 | -2.282401 | 1.741113  |

|   |           |           |          |
|---|-----------|-----------|----------|
| 6 | 1.191006  | -2.283819 | 1.739671 |
| 6 | -1.194362 | -3.233224 | 2.753419 |
| 1 | -2.141309 | -1.893130 | 1.410855 |
| 6 | 1.194191  | -3.234632 | 2.751979 |
| 1 | 2.141064  | -1.895410 | 1.408525 |
| 6 | -0.000073 | -3.726063 | 3.258040 |
| 1 | -2.140499 | -3.575818 | 3.155406 |
| 1 | 2.140408  | -3.578262 | 3.152896 |
| 1 | -0.000031 | -4.465642 | 4.049590 |

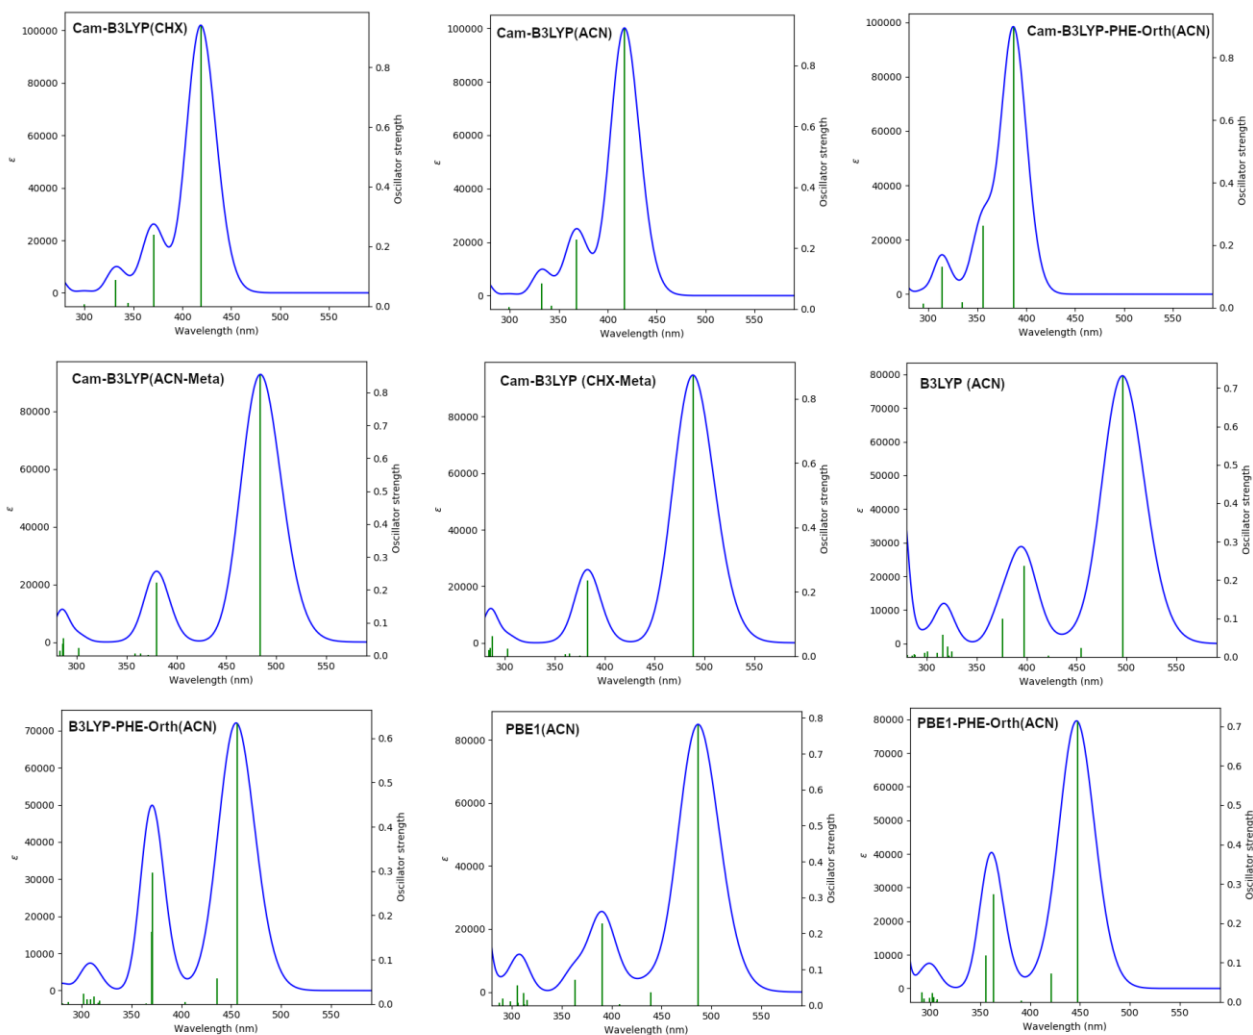

**Figure S1:** UV/Vis absorption spectra and oscillator strength in ACN and CHX at C-PCM/[B3LYP(D3), Cam-B3LYP(D3) and PBE1PBE(D3)]/6-311+G\*\* level for the two PHE-based rotamer of the simulated motor. The label PHE-Orth refers to the rotamer with the aromatic ring featuring an orthogonal mutual orientation with respect to the rotating arm (see Fig. 2, right panel in the manuscript). The absorption spectra of the metastable form (see Fig. 1, right panel) in ACN and CHX solution is also reported at C-PCM/Cam-B3LYP(D3)/6-311+G\*\* level.

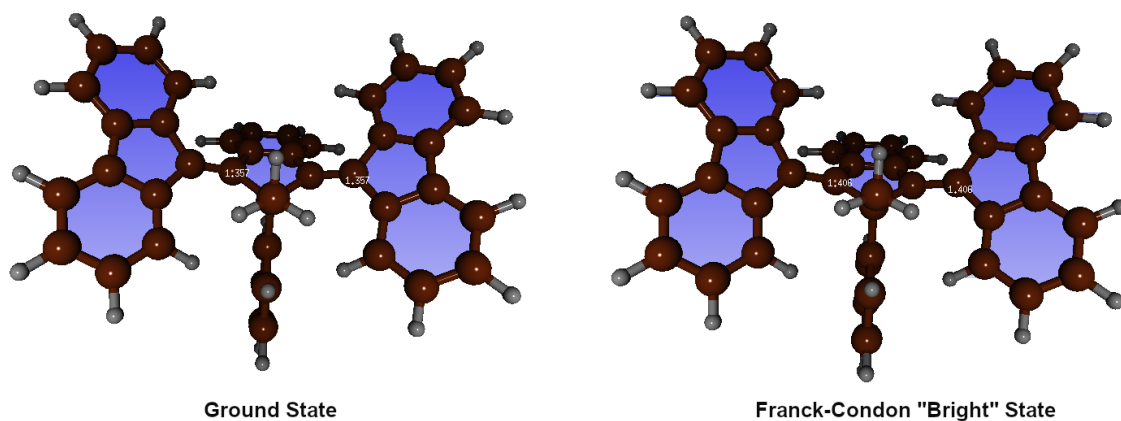

**Figure S2:** Optimized geometries at Cam-B3LYP(D3)/6-311G\*\*//C-PCM (ACN) level of theory. In this picture is also reported the elongation of the rotational axes when passing from ground-state to Frank-Condon "Bright" state.

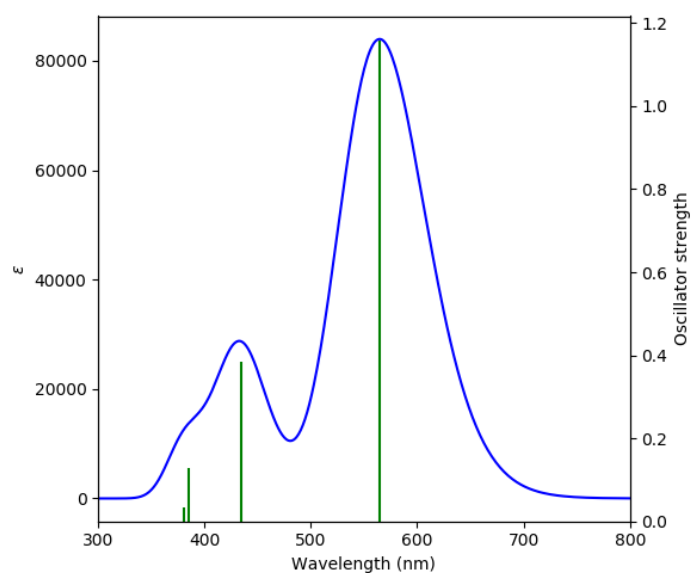

**Figure S3:** Fluorescence spectrum of the investigated molecular rotor in acetonitrile dilute solution at Cam-B3LYP(D3)/6-311G\*\*//C-PCM level of theory. Oscillator strengths are also reported as green histograms.

### Topology file (Acetonitrile, ACN)

; This include topology was generated for the paper below:  
 ; Carl Caleman, Paul J. van Maaren, Minyan Hong, Jochen S. Hub,  
 ; Luciano T. Costa and David van der Spoel  
 ; Force Field Benchmark of Organic Liquids: Density,  
 ; Enthalpy of Vaporization, Heat Capacities, Surface Tension,  
 ; Isothermal Compressibility, Volumetric Expansion Coefficient,  
 ; and Dielectric Constant

; J. Chem. Theor. Comput. 8 (2012) 61-74  
; http://dx.doi.org/10.1021/ct200731v  
; REFERENCE Caleman2012a  
; Corrected nrexcl to 3. DvdS, 2011-09-12

```
[ moleculetype ]
; Name      nrexcl
ACN         3

[ atoms ]
; nr  type resnr residue atom  cgnr  charge  mass typeB  chargeB  massB
  1  opls_755  1  ACN   C   1   -0.08  13.8574 ;qtot 0
  2  opls_759  1  ACN   H   1    0.06   1.0079 ;qtot 0
  3  opls_759  1  ACN   H   1    0.06   1.0079 ;qtot 0
  4  opls_759  1  ACN   H   1    0.06   1.0079 ;qtot 0
  5  opls_754  1  ACN   C   2    0.46    0 ;qtot 0
  6  opls_753  1  ACN   N   3   -0.56    0 ;qtot 0
  7    ML    1  ACN   ML   4    0  24.1707 ;qtot 0

[ bonds ]
; ai  aj funct      c0      c1      c2      c3
  1  2  1  0.10900  284512.0
  1  3  1  0.10900  284512.0
  1  4  1  0.10900  284512.0

#ifdef NORMALMODES
[ bonds ]
; ai  aj funct      c0  c1
  1  7  1  2.232581e-01  1e7
#else
[ constraints ]
; ai  aj funct      c0      c1
  1  7  1  2.232581e-01  0.000000e+00
#endif

[ exclusions ]
; i  excluded from i
  1  2  3  4  5
  2  1
  3  1
  4  1
  5  1  6  2  3  4
  6  6  5  1
  7  7

[ angles ]
; ai  aj  ak funct      c0      c1      c2      c3
  2  1  3  1      107.800  276.144 ; HC - CT - HC
  2  1  4  1      107.800  276.144 ; HC - CT - HC
  2  1  5  1      110.700  313.800 ; CT - CT - HC
  3  1  4  1      107.800  276.144 ; HC - CT - HC
  3  1  5  1      110.700  313.800 ; CT - CT - HC
  4  1  5  1      110.700  313.800 ; CT - CT - HC

[ virtual_sites2 ]
; ai  aj  ak funct      c0
  5  1  7  1  6.517123e-01
  6  1  7  1  1.166811e+00
```

### Gro-coordinates file (Molecular rotor, most stable rotamer)

LIGPARGEN GENERATED GRO FILE  
70

|      |     |    |        |        |        |
|------|-----|----|--------|--------|--------|
| 1GMR | C00 | 1  | 0.100  | 0.100  | 0.000  |
| 1GMR | C01 | 2  | -0.056 | 0.100  | 0.000  |
| 1GMR | C02 | 3  | -0.085 | 0.100  | 0.153  |
| 1GMR | C03 | 4  | 0.034  | 0.155  | 0.218  |
| 1GMR | C04 | 5  | 0.141  | 0.155  | 0.129  |
| 1GMR | C05 | 6  | 0.258  | 0.224  | 0.160  |
| 1GMR | C06 | 7  | 0.267  | 0.290  | 0.282  |
| 1GMR | C07 | 8  | 0.161  | 0.287  | 0.372  |
| 1GMR | C08 | 9  | 0.043  | 0.224  | 0.339  |
| 1GMR | C09 | 10 | -0.107 | -0.031 | -0.062 |
| 1GMR | H0A | 11 | 0.339  | 0.230  | 0.089  |
| 1GMR | H0B | 12 | 0.356  | 0.348  | 0.305  |
| 1GMR | H0C | 13 | 0.170  | 0.338  | 0.467  |
| 1GMR | H0D | 14 | -0.043 | 0.233  | 0.404  |
| 1GMR | C0E | 15 | -0.111 | 0.228  | -0.066 |
| 1GMR | H0F | 16 | -0.062 | -0.114 | -0.008 |
| 1GMR | H0G | 17 | -0.079 | -0.040 | -0.166 |
| 1GMR | H0H | 18 | -0.215 | -0.040 | -0.054 |
| 1GMR | C0I | 19 | -0.200 | 0.223  | -0.174 |
| 1GMR | C0J | 20 | -0.248 | 0.339  | -0.233 |
| 1GMR | C0K | 21 | -0.210 | 0.463  | -0.185 |
| 1GMR | C0M | 22 | -0.121 | 0.470  | -0.078 |
| 1GMR | C0N | 23 | -0.072 | 0.354  | -0.020 |
| 1GMR | H0O | 24 | -0.232 | 0.127  | -0.213 |
| 1GMR | H0P | 25 | -0.317 | 0.331  | -0.316 |
| 1GMR | H0Q | 26 | -0.248 | 0.553  | -0.231 |
| 1GMR | H0R | 27 | -0.090 | 0.566  | -0.039 |
| 1GMR | H0S | 28 | -0.003 | 0.362  | 0.063  |
| 1GMR | C0T | 29 | -0.194 | 0.052  | 0.219  |
| 1GMR | C0U | 30 | -0.193 | -0.005 | 0.357  |
| 1GMR | C0V | 31 | -0.322 | -0.049 | 0.389  |
| 1GMR | C0W | 32 | -0.411 | -0.017 | 0.278  |
| 1GMR | C0X | 33 | -0.335 | 0.039  | 0.174  |
| 1GMR | C0Y | 34 | -0.400 | 0.084  | 0.060  |
| 1GMR | C0Z | 35 | -0.537 | 0.068  | 0.048  |
| 1GMR | C10 | 36 | -0.611 | 0.005  | 0.148  |
| 1GMR | C11 | 37 | -0.548 | -0.035 | 0.266  |
| 1GMR | H12 | 38 | -0.717 | -0.012 | 0.135  |
| 1GMR | H13 | 39 | -0.587 | 0.104  | -0.042 |
| 1GMR | H14 | 40 | -0.605 | -0.080 | 0.347  |
| 1GMR | H15 | 41 | -0.346 | 0.133  | -0.020 |
| 1GMR | C16 | 42 | -0.088 | -0.036 | 0.444  |
| 1GMR | C17 | 43 | -0.115 | -0.103 | 0.562  |
| 1GMR | C18 | 44 | -0.245 | -0.139 | 0.597  |
| 1GMR | C19 | 45 | -0.349 | -0.117 | 0.508  |
| 1GMR | H1A | 46 | 0.014  | -0.009 | 0.420  |
| 1GMR | H1B | 47 | -0.033 | -0.127 | 0.629  |
| 1GMR | H1C | 48 | -0.265 | -0.185 | 0.693  |
| 1GMR | H1D | 49 | -0.450 | -0.151 | 0.530  |
| 1GMR | C1E | 50 | 0.185  | 0.052  | -0.095 |
| 1GMR | C1F | 51 | 0.320  | -0.005 | -0.068 |
| 1GMR | C1G | 52 | 0.166  | 0.039  | -0.241 |
| 1GMR | C1H | 53 | 0.376  | -0.049 | -0.189 |
| 1GMR | C1I | 54 | 0.283  | -0.017 | -0.297 |
| 1GMR | C1J | 55 | 0.497  | -0.117 | -0.193 |
| 1GMR | C1K | 56 | 0.564  | -0.142 | -0.074 |
| 1GMR | C1M | 57 | 0.510  | -0.098 | 0.046  |
| 1GMR | C1N | 58 | 0.386  | -0.036 | 0.051  |
| 1GMR | H1O | 59 | 0.658  | -0.195 | -0.076 |
| 1GMR | H1P | 60 | 0.565  | -0.112 | 0.138  |
| 1GMR | H1Q | 61 | 0.342  | -0.013 | 0.147  |
| 1GMR | H1R | 62 | 0.538  | -0.151 | -0.288 |
| 1GMR | C1S | 63 | 0.066  | 0.084  | -0.327 |
| 1GMR | C1T | 64 | 0.080  | 0.067  | -0.464 |

1GMR C1U 65 0.193 0.006 -0.518  
1GMR C1V 66 0.297 -0.033 -0.434  
1GMR H1W 67 0.388 -0.075 -0.476  
1GMR H1X 68 0.199 -0.012 -0.624  
1GMR H1Y 69 0.001 0.103 -0.530  
1GMR H1Z 70 -0.022 0.132 -0.288

### Topology file (Molecular rotor, most stable rotamer)

```
;  
; GENERATED BY LigParGen Server  
; Jorgensen Lab @ Yale University  
;  
[ atomtypes ]  
opls_863 C863 12.0110 0.000 A 3.55000E-01 2.92880E-01  
opls_854 C854 12.0110 0.000 A 3.55000E-01 2.92880E-01  
opls_826 H826 1.0080 0.000 A 2.42000E-01 1.25520E-01  
opls_829 C829 12.0110 0.000 A 3.55000E-01 2.92880E-01  
opls_859 H859 1.0080 0.000 A 2.42000E-01 1.25520E-01  
opls_858 H858 1.0080 0.000 A 2.42000E-01 1.25520E-01  
opls_856 C856 12.0110 0.000 A 3.55000E-01 2.92880E-01  
opls_830 C830 12.0110 0.000 A 3.55000E-01 2.92880E-01  
opls_855 C855 12.0110 0.000 A 3.55000E-01 2.92880E-01  
opls_835 C835 12.0110 0.000 A 3.55000E-01 2.92880E-01  
opls_865 C865 12.0110 0.000 A 3.55000E-01 2.92880E-01  
opls_844 C844 12.0110 0.000 A 3.55000E-01 2.92880E-01  
opls_846 H846 1.0080 0.000 A 2.42000E-01 1.25520E-01  
opls_862 C862 12.0110 0.000 A 3.55000E-01 2.92880E-01  
opls_843 C843 12.0110 0.000 A 3.55000E-01 2.92880E-01  
opls_823 H823 1.0080 0.000 A 2.42000E-01 1.25520E-01  
opls_868 H868 1.0080 0.000 A 2.42000E-01 1.25520E-01  
opls_814 C814 12.0110 0.000 A 3.55000E-01 2.92880E-01  
opls_864 C864 12.0110 0.000 A 3.55000E-01 2.92880E-01  
opls_833 C833 12.0110 0.000 A 3.55000E-01 2.92880E-01  
opls_852 C852 12.0110 0.000 A 3.55000E-01 2.92880E-01  
opls_866 H866 1.0080 0.000 A 2.42000E-01 1.25520E-01  
opls_815 H815 1.0080 0.000 A 2.50000E-01 1.25520E-01  
opls_801 C801 12.0110 0.000 A 3.50000E-01 2.76144E-01  
opls_841 C841 12.0110 0.000 A 3.55000E-01 2.92880E-01  
opls_837 H837 1.0080 0.000 A 2.42000E-01 1.25520E-01  
opls_818 C818 12.0110 0.000 A 3.55000E-01 2.92880E-01  
opls_840 H840 1.0080 0.000 A 2.42000E-01 1.25520E-01  
opls_832 C832 12.0110 0.000 A 3.55000E-01 2.92880E-01  
opls_821 C821 12.0110 0.000 A 3.55000E-01 2.92880E-01  
opls_812 H812 1.0080 0.000 A 2.42000E-01 1.25520E-01  
opls_847 H847 1.0080 0.000 A 2.42000E-01 1.25520E-01  
opls_819 C819 12.0110 0.000 A 3.55000E-01 2.92880E-01  
opls_869 H869 1.0080 0.000 A 2.42000E-01 1.25520E-01  
opls_805 C805 12.0110 0.000 A 3.55000E-01 2.92880E-01  
opls_803 C803 12.0110 0.000 A 3.55000E-01 3.17984E-01  
opls_845 H845 1.0080 0.000 A 2.42000E-01 1.25520E-01  
opls_816 H816 1.0080 0.000 A 2.50000E-01 1.25520E-01  
opls_811 H811 1.0080 0.000 A 2.42000E-01 1.25520E-01  
opls_867 H867 1.0080 0.000 A 2.42000E-01 1.25520E-01  
opls_810 H810 1.0080 0.000 A 2.42000E-01 1.25520E-01  
opls_802 C802 12.0110 0.000 A 3.55000E-01 2.92880E-01  
opls_804 C804 12.0110 0.000 A 3.55000E-01 3.17984E-01  
opls_827 H827 1.0080 0.000 A 2.42000E-01 1.25520E-01  
opls_834 C834 12.0110 0.000 A 3.55000E-01 2.92880E-01  
opls_824 H824 1.0080 0.000 A 2.42000E-01 1.25520E-01  
opls_806 C806 12.0110 0.000 A 3.55000E-01 2.92880E-01  
opls_828 C828 12.0110 0.000 A 3.55000E-01 3.17984E-01
```

```

opls_800 C800 12.0110 0.000 A 3.55000E-01 2.92880E-01
opls_849 C849 12.0110 0.000 A 3.55000E-01 3.17984E-01
opls_857 C857 12.0110 0.000 A 3.55000E-01 2.92880E-01
opls_853 C853 12.0110 0.000 A 3.55000E-01 2.92880E-01
opls_861 H861 1.0080 0.000 A 2.42000E-01 1.25520E-01
opls_813 H813 1.0080 0.000 A 2.42000E-01 1.25520E-01
opls_809 C809 12.0110 0.000 A 3.50000E-01 2.76144E-01
opls_807 C807 12.0110 0.000 A 3.55000E-01 2.92880E-01
opls_825 H825 1.0080 0.000 A 2.42000E-01 1.25520E-01
opls_817 H817 1.0080 0.000 A 2.50000E-01 1.25520E-01
opls_820 C820 12.0110 0.000 A 3.55000E-01 2.92880E-01
opls_839 H839 1.0080 0.000 A 2.42000E-01 1.25520E-01
opls_822 C822 12.0110 0.000 A 3.55000E-01 2.92880E-01
opls_850 C850 12.0110 0.000 A 3.55000E-01 2.92880E-01
opls_860 H860 1.0080 0.000 A 2.42000E-01 1.25520E-01
opls_851 C851 12.0110 0.000 A 3.55000E-01 2.92880E-01
opls_836 C836 12.0110 0.000 A 3.55000E-01 2.92880E-01
opls_848 H848 1.0080 0.000 A 2.42000E-01 1.25520E-01
opls_808 C808 12.0110 0.000 A 3.55000E-01 2.92880E-01
opls_838 H838 1.0080 0.000 A 2.42000E-01 1.25520E-01
opls_831 C831 12.0110 0.000 A 3.55000E-01 2.92880E-01
opls_842 C842 12.0110 0.000 A 3.55000E-01 2.92880E-01

```

[ moleculetype ]

```
; Name nrexcl
```

```
GMR 3
```

[ atoms ]

```
; nr type resnr residue atom cgnr charge mass
 1 opls_800 1 GMR C00 1 -0.022 12.0110
 2 opls_801 1 GMR C01 1 0.0841 12.0110
 3 opls_802 1 GMR C02 1 -0.0221 12.0110
 4 opls_803 1 GMR C03 1 -0.0555 12.0110
 5 opls_804 1 GMR C04 1 -0.0547 12.0110
 6 opls_805 1 GMR C05 1 -0.1109 12.0110
 7 opls_806 1 GMR C06 1 -0.1353 12.0110
 8 opls_807 1 GMR C07 1 -0.1351 12.0110
 9 opls_808 1 GMR C08 1 -0.1101 12.0110
10 opls_809 1 GMR C09 1 -0.239 12.0110
11 opls_810 1 GMR HOA 1 0.1586 1.0080
12 opls_811 1 GMR HOB 1 0.1437 1.0080
13 opls_812 1 GMR HOC 1 0.1437 1.0080
14 opls_813 1 GMR HOD 1 0.1577 1.0080
15 opls_814 1 GMR COE 1 -0.0666 12.0110
16 opls_815 1 GMR HOF 1 0.1036 1.0080
17 opls_816 1 GMR HOG 1 0.1036 1.0080
18 opls_817 1 GMR HOH 1 0.1036 1.0080
19 opls_818 1 GMR COI 1 -0.1474 12.0110
20 opls_819 1 GMR COJ 1 -0.1394 12.0110
21 opls_820 1 GMR COK 1 -0.1314 12.0110
22 opls_821 1 GMR COM 1 -0.1325 12.0110
23 opls_822 1 GMR CON 1 -0.1176 12.0110
24 opls_823 1 GMR HOO 1 0.1412 1.0080
25 opls_824 1 GMR HOP 1 0.1385 1.0080
26 opls_825 1 GMR HOQ 1 0.1406 1.0080
27 opls_826 1 GMR HOR 1 0.1401 1.0080
28 opls_827 1 GMR HOS 1 0.1505 1.0080
29 opls_828 1 GMR COT 1 -0.0094 12.0110
30 opls_829 1 GMR COU 1 -0.0523 12.0110
31 opls_830 1 GMR COV 1 -0.0466 12.0110
32 opls_831 1 GMR COW 1 -0.0446 12.0110
33 opls_832 1 GMR COX 2 -0.0453 12.0110
34 opls_833 1 GMR COY 2 -0.1132 12.0110
35 opls_834 1 GMR COZ 2 -0.1398 12.0110
36 opls_835 1 GMR C10 2 -0.1327 12.0110
37 opls_836 1 GMR C11 2 -0.1112 12.0110

```



|    |          |   |     |     |   |         |         |
|----|----------|---|-----|-----|---|---------|---------|
| 38 | opls_837 | 1 | GMR | H12 | 2 | 0.1392  | 1.0080  |
| 39 | opls_838 | 1 | GMR | H13 | 2 | 0.1386  | 1.0080  |
| 40 | opls_839 | 1 | GMR | H14 | 2 | 0.1428  | 1.0080  |
| 41 | opls_840 | 1 | GMR | H15 | 2 | 0.1537  | 1.0080  |
| 42 | opls_841 | 1 | GMR | C16 | 2 | -0.1113 | 12.0110 |
| 43 | opls_842 | 1 | GMR | C17 | 2 | -0.1397 | 12.0110 |
| 44 | opls_843 | 1 | GMR | C18 | 2 | -0.1339 | 12.0110 |
| 45 | opls_844 | 1 | GMR | C19 | 2 | -0.1099 | 12.0110 |
| 46 | opls_845 | 1 | GMR | H1A | 2 | 0.15    | 1.0080  |
| 47 | opls_846 | 1 | GMR | H1B | 2 | 0.1388  | 1.0080  |
| 48 | opls_847 | 1 | GMR | H1C | 2 | 0.1396  | 1.0080  |
| 49 | opls_848 | 1 | GMR | H1D | 2 | 0.1424  | 1.0080  |
| 50 | opls_849 | 1 | GMR | C1E | 2 | -0.0097 | 12.0110 |
| 51 | opls_850 | 1 | GMR | C1F | 2 | -0.0527 | 12.0110 |
| 52 | opls_851 | 1 | GMR | C1G | 2 | -0.0454 | 12.0110 |
| 53 | opls_852 | 1 | GMR | C1H | 2 | -0.046  | 12.0110 |
| 54 | opls_853 | 1 | GMR | C1I | 2 | -0.0446 | 12.0110 |
| 55 | opls_854 | 1 | GMR | C1J | 2 | -0.1105 | 12.0110 |
| 56 | opls_855 | 1 | GMR | C1K | 2 | -0.1332 | 12.0110 |
| 57 | opls_856 | 1 | GMR | C1M | 2 | -0.1399 | 12.0110 |
| 58 | opls_857 | 1 | GMR | C1N | 2 | -0.1109 | 12.0110 |
| 59 | opls_858 | 1 | GMR | H1O | 2 | 0.1399  | 1.0080  |
| 60 | opls_859 | 1 | GMR | H1P | 2 | 0.1381  | 1.0080  |
| 61 | opls_860 | 1 | GMR | H1Q | 2 | 0.1503  | 1.0080  |
| 62 | opls_861 | 1 | GMR | H1R | 2 | 0.1423  | 1.0080  |
| 63 | opls_862 | 1 | GMR | C1S | 2 | -0.1136 | 12.0110 |
| 64 | opls_863 | 1 | GMR | C1T | 2 | -0.1398 | 12.0110 |
| 65 | opls_864 | 1 | GMR | C1U | 2 | -0.1326 | 12.0110 |
| 66 | opls_865 | 1 | GMR | C1V | 3 | -0.1109 | 12.0110 |
| 67 | opls_866 | 1 | GMR | H1W | 3 | 0.1425  | 1.0080  |
| 68 | opls_867 | 1 | GMR | H1X | 3 | 0.1392  | 1.0080  |
| 69 | opls_868 | 1 | GMR | H1Y | 3 | 0.1386  | 1.0080  |
| 70 | opls_869 | 1 | GMR | H1Z | 3 | 0.1537  | 1.0080  |

[ bonds ]

|    |    |   |        |            |
|----|----|---|--------|------------|
| 2  | 1  | 1 | 0.1495 | 265265.600 |
| 3  | 2  | 1 | 0.1495 | 265265.600 |
| 4  | 3  | 1 | 0.1433 | 357313.600 |
| 5  | 1  | 1 | 0.1433 | 357313.600 |
| 6  | 5  | 1 | 0.1433 | 357313.600 |
| 7  | 6  | 1 | 0.1400 | 392459.200 |
| 8  | 7  | 1 | 0.1400 | 392459.200 |
| 9  | 4  | 1 | 0.1433 | 357313.600 |
| 10 | 2  | 1 | 0.1529 | 224262.400 |
| 11 | 6  | 1 | 0.1080 | 307105.600 |
| 12 | 7  | 1 | 0.1080 | 307105.600 |
| 13 | 8  | 1 | 0.1080 | 307105.600 |
| 14 | 9  | 1 | 0.1080 | 307105.600 |
| 15 | 2  | 1 | 0.1510 | 265265.600 |
| 16 | 10 | 1 | 0.1090 | 284512.000 |
| 17 | 10 | 1 | 0.1090 | 284512.000 |
| 18 | 10 | 1 | 0.1090 | 284512.000 |
| 19 | 15 | 1 | 0.1400 | 392459.200 |
| 20 | 19 | 1 | 0.1400 | 392459.200 |
| 21 | 20 | 1 | 0.1400 | 392459.200 |
| 22 | 21 | 1 | 0.1400 | 392459.200 |
| 23 | 15 | 1 | 0.1400 | 392459.200 |
| 24 | 19 | 1 | 0.1080 | 307105.600 |
| 25 | 20 | 1 | 0.1080 | 307105.600 |
| 26 | 21 | 1 | 0.1080 | 307105.600 |
| 27 | 22 | 1 | 0.1080 | 307105.600 |
| 28 | 23 | 1 | 0.1080 | 307105.600 |
| 29 | 3  | 1 | 0.1433 | 357313.600 |
| 30 | 29 | 1 | 0.1433 | 357313.600 |
| 31 | 30 | 1 | 0.1424 | 392459.200 |

```

32 31 1 0.1424 392459.200
33 29 1 0.1433 357313.600
34 33 1 0.1400 392459.200
35 34 1 0.1400 392459.200
36 35 1 0.1400 392459.200
37 32 1 0.1400 392459.200
38 36 1 0.1080 307105.600
39 35 1 0.1080 307105.600
40 37 1 0.1080 307105.600
41 34 1 0.1080 307105.600
42 30 1 0.1400 392459.200
43 42 1 0.1400 392459.200
44 43 1 0.1400 392459.200
45 31 1 0.1400 392459.200
46 42 1 0.1080 307105.600
47 43 1 0.1080 307105.600
48 44 1 0.1080 307105.600
49 45 1 0.1080 307105.600
50 1 1 0.1433 357313.600
51 50 1 0.1433 357313.600
52 50 1 0.1433 357313.600
53 51 1 0.1424 392459.200
54 52 1 0.1424 392459.200
55 53 1 0.1400 392459.200
56 55 1 0.1400 392459.200
57 56 1 0.1400 392459.200
58 51 1 0.1400 392459.200
59 56 1 0.1080 307105.600
60 57 1 0.1080 307105.600
61 58 1 0.1080 307105.600
62 55 1 0.1080 307105.600
63 52 1 0.1400 392459.200
64 63 1 0.1400 392459.200
65 64 1 0.1400 392459.200
66 54 1 0.1400 392459.200
67 66 1 0.1080 307105.600
68 65 1 0.1080 307105.600
69 64 1 0.1080 307105.600
70 63 1 0.1080 307105.600
5 4 1 0.1460 322168.000
9 8 1 0.1400 392459.200
23 22 1 0.1400 392459.200
33 32 1 0.1424 392459.200
37 36 1 0.1400 392459.200
45 44 1 0.1400 392459.200
54 53 1 0.1424 392459.200
58 57 1 0.1400 392459.200
66 65 1 0.1400 392459.200

```

[ angles ]

```

; ai aj ak funct c0 c1 c2 c3
1 2 3 1 109.500 334.720
2 3 4 1 119.200 525.092
2 1 5 1 119.200 525.092
1 5 6 1 115.690 382.752
5 6 7 1 124.000 585.760
6 7 8 1 120.000 527.184
3 4 9 1 115.690 382.752
1 2 10 1 115.600 527.184
5 6 11 1 118.990 539.820
6 7 12 1 120.000 292.880
7 8 13 1 120.000 292.880
4 9 14 1 118.990 539.820
1 2 15 1 109.500 334.720
2 10 16 1 110.700 313.800

```

|    |    |    |   |         |         |
|----|----|----|---|---------|---------|
| 2  | 10 | 17 | 1 | 110.700 | 313.800 |
| 2  | 10 | 18 | 1 | 110.700 | 313.800 |
| 2  | 15 | 19 | 1 | 120.000 | 585.760 |
| 15 | 19 | 20 | 1 | 120.000 | 527.184 |
| 19 | 20 | 21 | 1 | 120.000 | 527.184 |
| 20 | 21 | 22 | 1 | 120.000 | 527.184 |
| 2  | 15 | 23 | 1 | 120.000 | 585.760 |
| 15 | 19 | 24 | 1 | 120.000 | 292.880 |
| 19 | 20 | 25 | 1 | 120.000 | 292.880 |
| 20 | 21 | 26 | 1 | 120.000 | 292.880 |
| 21 | 22 | 27 | 1 | 120.000 | 292.880 |
| 15 | 23 | 28 | 1 | 120.000 | 292.880 |
| 2  | 3  | 29 | 1 | 119.200 | 525.092 |
| 3  | 29 | 30 | 1 | 115.690 | 382.752 |
| 29 | 30 | 31 | 1 | 124.000 | 585.760 |
| 30 | 31 | 32 | 1 | 120.000 | 527.184 |
| 3  | 29 | 33 | 1 | 115.690 | 382.752 |
| 29 | 33 | 34 | 1 | 124.000 | 585.760 |
| 33 | 34 | 35 | 1 | 120.000 | 527.184 |
| 34 | 35 | 36 | 1 | 120.000 | 527.184 |
| 31 | 32 | 37 | 1 | 120.000 | 527.184 |
| 35 | 36 | 38 | 1 | 120.000 | 292.880 |
| 34 | 35 | 39 | 1 | 120.000 | 292.880 |
| 32 | 37 | 40 | 1 | 120.000 | 292.880 |
| 33 | 34 | 41 | 1 | 120.000 | 292.880 |
| 29 | 30 | 42 | 1 | 124.000 | 585.760 |
| 30 | 42 | 43 | 1 | 120.000 | 527.184 |
| 42 | 43 | 44 | 1 | 120.000 | 527.184 |
| 30 | 31 | 45 | 1 | 120.000 | 527.184 |
| 30 | 42 | 46 | 1 | 120.000 | 292.880 |
| 42 | 43 | 47 | 1 | 120.000 | 292.880 |
| 43 | 44 | 48 | 1 | 120.000 | 292.880 |
| 31 | 45 | 49 | 1 | 120.000 | 292.880 |
| 2  | 1  | 50 | 1 | 119.200 | 525.092 |
| 1  | 50 | 51 | 1 | 115.690 | 382.752 |
| 1  | 50 | 52 | 1 | 115.690 | 382.752 |
| 50 | 51 | 53 | 1 | 124.000 | 585.760 |
| 50 | 52 | 54 | 1 | 124.000 | 585.760 |
| 51 | 53 | 55 | 1 | 120.000 | 527.184 |
| 53 | 55 | 56 | 1 | 120.000 | 527.184 |
| 55 | 56 | 57 | 1 | 120.000 | 527.184 |
| 50 | 51 | 58 | 1 | 124.000 | 585.760 |
| 55 | 56 | 59 | 1 | 120.000 | 292.880 |
| 56 | 57 | 60 | 1 | 120.000 | 292.880 |
| 51 | 58 | 61 | 1 | 120.000 | 292.880 |
| 53 | 55 | 62 | 1 | 120.000 | 292.880 |
| 50 | 52 | 63 | 1 | 124.000 | 585.760 |
| 52 | 63 | 64 | 1 | 120.000 | 527.184 |
| 63 | 64 | 65 | 1 | 120.000 | 527.184 |
| 52 | 54 | 66 | 1 | 120.000 | 527.184 |
| 54 | 66 | 67 | 1 | 120.000 | 292.880 |
| 64 | 65 | 68 | 1 | 120.000 | 292.880 |
| 63 | 64 | 69 | 1 | 120.000 | 292.880 |
| 52 | 63 | 70 | 1 | 120.000 | 292.880 |
| 56 | 55 | 62 | 1 | 120.000 | 292.880 |
| 66 | 65 | 68 | 1 | 120.000 | 292.880 |
| 65 | 64 | 69 | 1 | 120.000 | 292.880 |
| 8  | 7  | 12 | 1 | 120.000 | 292.880 |
| 20 | 19 | 24 | 1 | 120.000 | 292.880 |
| 54 | 53 | 55 | 1 | 120.000 | 527.184 |
| 57 | 56 | 59 | 1 | 120.000 | 292.880 |
| 45 | 44 | 48 | 1 | 120.000 | 292.880 |
| 53 | 51 | 58 | 1 | 120.000 | 527.184 |
| 32 | 37 | 36 | 1 | 120.000 | 527.184 |

```

19 15 23 1 120.000 527.184
51 50 52 1 115.690 382.752
64 63 70 1 120.000 292.880
3 2 10 1 115.600 527.184
36 37 40 1 120.000 292.880
56 57 58 1 120.000 527.184
3 2 15 1 109.500 334.720
5 4 9 1 117.000 711.280
53 54 66 1 120.000 527.184
44 45 49 1 120.000 292.880
37 36 38 1 120.000 292.880
22 23 28 1 120.000 292.880
30 29 33 1 115.690 382.752
57 58 61 1 120.000 292.880
4 3 29 1 119.200 525.092
58 57 60 1 120.000 292.880
10 2 15 1 114.000 527.184
32 33 34 1 120.000 527.184
52 54 53 1 120.000 527.184
21 22 23 1 120.000 527.184
8 9 14 1 120.000 292.880
54 52 63 1 120.000 527.184
16 10 17 1 107.800 276.144
35 34 41 1 120.000 292.880
54 66 65 1 120.000 527.184
5 1 50 1 119.200 525.092
4 9 8 1 124.000 585.760
43 42 46 1 120.000 292.880
7 6 11 1 120.000 292.880
16 10 18 1 107.800 276.144
35 36 37 1 120.000 527.184
36 35 39 1 120.000 292.880
32 31 45 1 120.000 527.184
17 10 18 1 107.800 276.144
22 21 26 1 120.000 292.880
15 23 22 1 120.000 527.184
7 8 9 1 120.000 527.184
23 22 27 1 120.000 292.880
3 4 5 1 117.000 711.280
33 32 37 1 120.000 527.184
4 5 6 1 117.000 711.280
1 5 4 1 117.000 711.280
65 66 67 1 120.000 292.880
29 33 32 1 124.000 585.760
43 44 45 1 120.000 527.184
9 8 13 1 120.000 292.880
44 43 47 1 120.000 292.880
31 45 44 1 120.000 527.184
64 65 66 1 120.000 527.184
51 53 54 1 120.000 527.184
31 32 33 1 120.000 527.184
21 20 25 1 120.000 292.880
31 30 42 1 120.000 527.184
51 58 57 1 120.000 527.184

```

[ dihedrals ]

; IMPROPER DIHEDRAL ANGLES

```

; ai aj ak al funct c0 c1 c2 c3 c4 c5
50 1 2 5 4 180.000 10.460 2
29 3 2 4 4 180.000 10.460 2
6 5 1 4 4 180.000 10.460 2
9 4 3 5 4 180.000 10.460 2
23 15 2 19 4 180.000 10.460 2
34 33 29 32 4 180.000 10.460 2

```

|    |    |    |    |   |         |        |   |
|----|----|----|----|---|---------|--------|---|
| 42 | 30 | 29 | 31 | 4 | 180.000 | 10.460 | 2 |
| 58 | 51 | 50 | 53 | 4 | 180.000 | 10.460 | 2 |
| 63 | 52 | 50 | 54 | 4 | 180.000 | 10.460 | 2 |
| 55 | 53 | 51 | 54 | 4 | 180.000 | 10.460 | 2 |
| 37 | 32 | 31 | 33 | 4 | 180.000 | 10.460 | 2 |
| 66 | 54 | 52 | 53 | 4 | 180.000 | 10.460 | 2 |
| 45 | 31 | 30 | 32 | 4 | 180.000 | 10.460 | 2 |
| 33 | 29 | 3  | 30 | 4 | 180.000 | 10.460 | 2 |
| 52 | 50 | 1  | 51 | 4 | 180.000 | 10.460 | 2 |
| 11 | 6  | 5  | 7  | 4 | 180.000 | 10.460 | 2 |
| 14 | 9  | 4  | 8  | 4 | 180.000 | 10.460 | 2 |
| 27 | 22 | 21 | 23 | 4 | 180.000 | 10.460 | 2 |
| 38 | 36 | 35 | 37 | 4 | 180.000 | 10.460 | 2 |
| 26 | 21 | 20 | 22 | 4 | 180.000 | 10.460 | 2 |
| 69 | 64 | 63 | 65 | 4 | 180.000 | 10.460 | 2 |
| 68 | 65 | 64 | 66 | 4 | 180.000 | 10.460 | 2 |
| 24 | 19 | 15 | 20 | 4 | 180.000 | 10.460 | 2 |
| 25 | 20 | 19 | 21 | 4 | 180.000 | 10.460 | 2 |
| 28 | 23 | 15 | 22 | 4 | 180.000 | 10.460 | 2 |
| 12 | 7  | 6  | 8  | 4 | 180.000 | 10.460 | 2 |
| 60 | 57 | 56 | 58 | 4 | 180.000 | 10.460 | 2 |
| 59 | 56 | 55 | 57 | 4 | 180.000 | 10.460 | 2 |
| 47 | 43 | 42 | 44 | 4 | 180.000 | 10.460 | 2 |
| 13 | 8  | 7  | 9  | 4 | 180.000 | 10.460 | 2 |
| 48 | 44 | 43 | 45 | 4 | 180.000 | 10.460 | 2 |
| 39 | 35 | 34 | 36 | 4 | 180.000 | 10.460 | 2 |
| 46 | 42 | 30 | 43 | 4 | 180.000 | 10.460 | 2 |
| 40 | 37 | 32 | 36 | 4 | 180.000 | 10.460 | 2 |
| 70 | 63 | 52 | 64 | 4 | 180.000 | 10.460 | 2 |
| 61 | 58 | 51 | 57 | 4 | 180.000 | 10.460 | 2 |
| 62 | 55 | 53 | 56 | 4 | 180.000 | 10.460 | 2 |
| 67 | 66 | 54 | 65 | 4 | 180.000 | 10.460 | 2 |
| 49 | 45 | 31 | 44 | 4 | 180.000 | 10.460 | 2 |
| 41 | 34 | 33 | 35 | 4 | 180.000 | 10.460 | 2 |

[ dihedrals ]

; PROPER DIHEDRAL ANGLES

| ; ai | aj | ak | al | funct | c0     | c1     | c2      | c3     | c4     | c5    |
|------|----|----|----|-------|--------|--------|---------|--------|--------|-------|
| 5    | 4  | 3  | 2  | 3     | 0.527  | -6.397 | -1.695  | 7.565  | -0.000 | 0.000 |
| 4    | 5  | 1  | 2  | 3     | 0.527  | -6.397 | -1.695  | 7.565  | -0.000 | 0.000 |
| 50   | 1  | 5  | 4  | 3     | 30.334 | 0.000  | -30.334 | -0.000 | -0.000 | 0.000 |
| 29   | 3  | 4  | 5  | 3     | 30.334 | 0.000  | -30.334 | -0.000 | -0.000 | 0.000 |
| 29   | 3  | 4  | 9  | 3     | 9.079  | 0.000  | -9.079  | -0.000 | -0.000 | 0.000 |
| 50   | 1  | 5  | 6  | 3     | 9.079  | 0.000  | -9.079  | -0.000 | -0.000 | 0.000 |
| 29   | 3  | 2  | 15 | 3     | 9.079  | 0.000  | -9.079  | -0.000 | -0.000 | 0.000 |
| 50   | 1  | 2  | 15 | 3     | 9.079  | 0.000  | -9.079  | -0.000 | -0.000 | 0.000 |
| 4    | 3  | 2  | 1  | 3     | 9.079  | 0.000  | -9.079  | -0.000 | -0.000 | 0.000 |
| 50   | 1  | 2  | 3  | 3     | 9.079  | 0.000  | -9.079  | -0.000 | -0.000 | 0.000 |
| 29   | 3  | 2  | 1  | 3     | 9.079  | 0.000  | -9.079  | -0.000 | -0.000 | 0.000 |
| 5    | 1  | 2  | 3  | 3     | 9.079  | 0.000  | -9.079  | -0.000 | -0.000 | 0.000 |
| 29   | 3  | 2  | 10 | 3     | 0.000  | 0.000  | 0.000   | -0.000 | -0.000 | 0.000 |
| 50   | 1  | 2  | 10 | 3     | 0.000  | 0.000  | 0.000   | -0.000 | -0.000 | 0.000 |
| 9    | 4  | 5  | 6  | 3     | 0.628  | 1.883  | 0.000   | -2.510 | -0.000 | 0.000 |
| 9    | 4  | 5  | 1  | 3     | 0.628  | 1.883  | 0.000   | -2.510 | -0.000 | 0.000 |
| 6    | 5  | 4  | 3  | 3     | 0.628  | 1.883  | 0.000   | -2.510 | -0.000 | 0.000 |
| 9    | 4  | 3  | 2  | 3     | 58.576 | 0.000  | -58.576 | -0.000 | -0.000 | 0.000 |
| 6    | 5  | 1  | 2  | 3     | 58.576 | 0.000  | -58.576 | -0.000 | -0.000 | 0.000 |
| 7    | 6  | 5  | 4  | 3     | 16.027 | -4.391 | -14.029 | 2.393  | -0.000 | 0.000 |
| 8    | 9  | 4  | 5  | 3     | 16.027 | -4.391 | -14.029 | 2.393  | -0.000 | 0.000 |
| 7    | 6  | 5  | 1  | 3     | 16.027 | -4.391 | -14.029 | 2.393  | -0.000 | 0.000 |
| 8    | 9  | 4  | 3  | 3     | 16.027 | -4.391 | -14.029 | 2.393  | -0.000 | 0.000 |
| 7    | 8  | 9  | 4  | 3     | 30.334 | 0.000  | -30.334 | -0.000 | -0.000 | 0.000 |
| 8    | 7  | 6  | 5  | 3     | 30.334 | 0.000  | -30.334 | -0.000 | -0.000 | 0.000 |
| 23   | 22 | 21 | 20 | 3     | 30.334 | 0.000  | -30.334 | -0.000 | -0.000 | 0.000 |

|    |    |    |    |   |        |       |         |        |        |       |
|----|----|----|----|---|--------|-------|---------|--------|--------|-------|
| 21 | 20 | 19 | 15 | 3 | 30.334 | 0.000 | -30.334 | -0.000 | -0.000 | 0.000 |
| 22 | 21 | 20 | 19 | 3 | 30.334 | 0.000 | -30.334 | -0.000 | -0.000 | 0.000 |
| 66 | 65 | 64 | 63 | 3 | 30.334 | 0.000 | -30.334 | -0.000 | -0.000 | 0.000 |
| 22 | 23 | 15 | 19 | 3 | 30.334 | 0.000 | -30.334 | -0.000 | -0.000 | 0.000 |
| 37 | 36 | 35 | 34 | 3 | 30.334 | 0.000 | -30.334 | -0.000 | -0.000 | 0.000 |
| 21 | 22 | 23 | 15 | 3 | 30.334 | 0.000 | -30.334 | -0.000 | -0.000 | 0.000 |
| 58 | 57 | 56 | 55 | 3 | 30.334 | 0.000 | -30.334 | -0.000 | -0.000 | 0.000 |
| 45 | 44 | 43 | 42 | 3 | 30.334 | 0.000 | -30.334 | -0.000 | -0.000 | 0.000 |
| 9  | 8  | 7  | 6  | 3 | 30.334 | 0.000 | -30.334 | -0.000 | -0.000 | 0.000 |
| 23 | 15 | 19 | 20 | 3 | 30.334 | 0.000 | -30.334 | -0.000 | -0.000 | 0.000 |
| 65 | 64 | 63 | 52 | 3 | 30.334 | 0.000 | -30.334 | -0.000 | -0.000 | 0.000 |
| 56 | 57 | 58 | 51 | 3 | 30.334 | 0.000 | -30.334 | -0.000 | -0.000 | 0.000 |
| 57 | 56 | 55 | 53 | 3 | 30.334 | 0.000 | -30.334 | -0.000 | -0.000 | 0.000 |
| 44 | 43 | 42 | 30 | 3 | 30.334 | 0.000 | -30.334 | -0.000 | -0.000 | 0.000 |
| 35 | 36 | 37 | 32 | 3 | 30.334 | 0.000 | -30.334 | -0.000 | -0.000 | 0.000 |
| 36 | 35 | 34 | 33 | 3 | 30.334 | 0.000 | -30.334 | -0.000 | -0.000 | 0.000 |
| 64 | 65 | 66 | 54 | 3 | 30.334 | 0.000 | -30.334 | -0.000 | -0.000 | 0.000 |
| 43 | 44 | 45 | 31 | 3 | 30.334 | 0.000 | -30.334 | -0.000 | -0.000 | 0.000 |
| 22 | 23 | 15 | 2  | 3 | 30.334 | 0.000 | -30.334 | -0.000 | -0.000 | 0.000 |
| 20 | 19 | 15 | 2  | 3 | 30.334 | 0.000 | -30.334 | -0.000 | -0.000 | 0.000 |
| 57 | 58 | 51 | 50 | 3 | 30.334 | 0.000 | -30.334 | -0.000 | -0.000 | 0.000 |
| 35 | 34 | 33 | 29 | 3 | 30.334 | 0.000 | -30.334 | -0.000 | -0.000 | 0.000 |
| 43 | 42 | 30 | 29 | 3 | 30.334 | 0.000 | -30.334 | -0.000 | -0.000 | 0.000 |
| 64 | 63 | 52 | 50 | 3 | 30.334 | 0.000 | -30.334 | -0.000 | -0.000 | 0.000 |
| 56 | 55 | 53 | 54 | 3 | 9.079  | 0.000 | -9.079  | -0.000 | -0.000 | 0.000 |
| 57 | 58 | 51 | 53 | 3 | 9.079  | 0.000 | -9.079  | -0.000 | -0.000 | 0.000 |
| 44 | 45 | 31 | 30 | 3 | 9.079  | 0.000 | -9.079  | -0.000 | -0.000 | 0.000 |
| 44 | 45 | 31 | 32 | 3 | 9.079  | 0.000 | -9.079  | -0.000 | -0.000 | 0.000 |
| 65 | 66 | 54 | 52 | 3 | 9.079  | 0.000 | -9.079  | -0.000 | -0.000 | 0.000 |
| 43 | 42 | 30 | 31 | 3 | 9.079  | 0.000 | -9.079  | -0.000 | -0.000 | 0.000 |
| 65 | 66 | 54 | 53 | 3 | 9.079  | 0.000 | -9.079  | -0.000 | -0.000 | 0.000 |
| 64 | 63 | 52 | 54 | 3 | 9.079  | 0.000 | -9.079  | -0.000 | -0.000 | 0.000 |
| 35 | 34 | 33 | 32 | 3 | 9.079  | 0.000 | -9.079  | -0.000 | -0.000 | 0.000 |
| 56 | 55 | 53 | 51 | 3 | 9.079  | 0.000 | -9.079  | -0.000 | -0.000 | 0.000 |
| 36 | 37 | 32 | 33 | 3 | 9.079  | 0.000 | -9.079  | -0.000 | -0.000 | 0.000 |
| 36 | 37 | 32 | 31 | 3 | 9.079  | 0.000 | -9.079  | -0.000 | -0.000 | 0.000 |
| 19 | 15 | 2  | 3  | 3 | 0.000  | 0.000 | 0.000   | -0.000 | -0.000 | 0.000 |
| 23 | 15 | 2  | 1  | 3 | 0.000  | 0.000 | 0.000   | -0.000 | -0.000 | 0.000 |
| 23 | 15 | 2  | 3  | 3 | 0.000  | 0.000 | 0.000   | -0.000 | -0.000 | 0.000 |
| 19 | 15 | 2  | 1  | 3 | 0.000  | 0.000 | 0.000   | -0.000 | -0.000 | 0.000 |
| 19 | 15 | 2  | 10 | 3 | 0.000  | 0.000 | 0.000   | -0.000 | -0.000 | 0.000 |
| 23 | 15 | 2  | 10 | 3 | 0.000  | 0.000 | 0.000   | -0.000 | -0.000 | 0.000 |
| 42 | 30 | 29 | 3  | 3 | 9.079  | 0.000 | -9.079  | -0.000 | -0.000 | 0.000 |
| 58 | 51 | 50 | 1  | 3 | 9.079  | 0.000 | -9.079  | -0.000 | -0.000 | 0.000 |
| 58 | 51 | 50 | 52 | 3 | 9.079  | 0.000 | -9.079  | -0.000 | -0.000 | 0.000 |
| 34 | 33 | 29 | 30 | 3 | 9.079  | 0.000 | -9.079  | -0.000 | -0.000 | 0.000 |
| 42 | 30 | 29 | 33 | 3 | 9.079  | 0.000 | -9.079  | -0.000 | -0.000 | 0.000 |
| 63 | 52 | 50 | 1  | 3 | 9.079  | 0.000 | -9.079  | -0.000 | -0.000 | 0.000 |
| 63 | 52 | 50 | 51 | 3 | 9.079  | 0.000 | -9.079  | -0.000 | -0.000 | 0.000 |
| 34 | 33 | 29 | 3  | 3 | 9.079  | 0.000 | -9.079  | -0.000 | -0.000 | 0.000 |
| 66 | 54 | 52 | 50 | 3 | 9.079  | 0.000 | -9.079  | -0.000 | -0.000 | 0.000 |
| 45 | 31 | 30 | 29 | 3 | 9.079  | 0.000 | -9.079  | -0.000 | -0.000 | 0.000 |
| 55 | 53 | 51 | 50 | 3 | 9.079  | 0.000 | -9.079  | -0.000 | -0.000 | 0.000 |
| 37 | 32 | 33 | 29 | 3 | 9.079  | 0.000 | -9.079  | -0.000 | -0.000 | 0.000 |
| 66 | 54 | 52 | 63 | 3 | 9.079  | 0.000 | -9.079  | -0.000 | -0.000 | 0.000 |
| 58 | 51 | 53 | 55 | 3 | 9.079  | 0.000 | -9.079  | -0.000 | -0.000 | 0.000 |
| 66 | 54 | 53 | 55 | 3 | 9.079  | 0.000 | -9.079  | -0.000 | -0.000 | 0.000 |
| 37 | 32 | 33 | 34 | 3 | 9.079  | 0.000 | -9.079  | -0.000 | -0.000 | 0.000 |
| 45 | 31 | 30 | 42 | 3 | 9.079  | 0.000 | -9.079  | -0.000 | -0.000 | 0.000 |
| 45 | 31 | 32 | 37 | 3 | 9.079  | 0.000 | -9.079  | -0.000 | -0.000 | 0.000 |
| 55 | 53 | 54 | 52 | 3 | 9.079  | 0.000 | -9.079  | -0.000 | -0.000 | 0.000 |
| 45 | 31 | 32 | 33 | 3 | 9.079  | 0.000 | -9.079  | -0.000 | -0.000 | 0.000 |
| 66 | 54 | 53 | 51 | 3 | 9.079  | 0.000 | -9.079  | -0.000 | -0.000 | 0.000 |
| 37 | 32 | 31 | 30 | 3 | 9.079  | 0.000 | -9.079  | -0.000 | -0.000 | 0.000 |

|    |    |    |    |   |        |       |         |        |        |       |
|----|----|----|----|---|--------|-------|---------|--------|--------|-------|
| 34 | 33 | 32 | 31 | 3 | 9.079  | 0.000 | -9.079  | -0.000 | -0.000 | 0.000 |
| 63 | 52 | 54 | 53 | 3 | 9.079  | 0.000 | -9.079  | -0.000 | -0.000 | 0.000 |
| 42 | 30 | 31 | 32 | 3 | 9.079  | 0.000 | -9.079  | -0.000 | -0.000 | 0.000 |
| 58 | 51 | 53 | 54 | 3 | 9.079  | 0.000 | -9.079  | -0.000 | -0.000 | 0.000 |
| 15 | 2  | 1  | 5  | 3 | 9.079  | 0.000 | -9.079  | -0.000 | -0.000 | 0.000 |
| 15 | 2  | 3  | 4  | 3 | 9.079  | 0.000 | -9.079  | -0.000 | -0.000 | 0.000 |
| 3  | 4  | 5  | 1  | 3 | 0.628  | 1.883 | 0.000   | -2.510 | -0.000 | 0.000 |
| 30 | 29 | 3  | 4  | 3 | 9.079  | 0.000 | -9.079  | -0.000 | -0.000 | 0.000 |
| 52 | 50 | 1  | 5  | 3 | 9.079  | 0.000 | -9.079  | -0.000 | -0.000 | 0.000 |
| 51 | 50 | 1  | 5  | 3 | 9.079  | 0.000 | -9.079  | -0.000 | -0.000 | 0.000 |
| 33 | 29 | 3  | 4  | 3 | 9.079  | 0.000 | -9.079  | -0.000 | -0.000 | 0.000 |
| 33 | 29 | 30 | 31 | 3 | 9.079  | 0.000 | -9.079  | -0.000 | -0.000 | 0.000 |
| 30 | 29 | 3  | 2  | 3 | 9.079  | 0.000 | -9.079  | -0.000 | -0.000 | 0.000 |
| 51 | 50 | 1  | 2  | 3 | 9.079  | 0.000 | -9.079  | -0.000 | -0.000 | 0.000 |
| 52 | 50 | 1  | 2  | 3 | 9.079  | 0.000 | -9.079  | -0.000 | -0.000 | 0.000 |
| 33 | 29 | 3  | 2  | 3 | 9.079  | 0.000 | -9.079  | -0.000 | -0.000 | 0.000 |
| 54 | 52 | 50 | 1  | 3 | 9.079  | 0.000 | -9.079  | -0.000 | -0.000 | 0.000 |
| 31 | 30 | 29 | 3  | 3 | 9.079  | 0.000 | -9.079  | -0.000 | -0.000 | 0.000 |
| 32 | 33 | 29 | 3  | 3 | 9.079  | 0.000 | -9.079  | -0.000 | -0.000 | 0.000 |
| 53 | 51 | 50 | 1  | 3 | 9.079  | 0.000 | -9.079  | -0.000 | -0.000 | 0.000 |
| 53 | 51 | 50 | 52 | 3 | 9.079  | 0.000 | -9.079  | -0.000 | -0.000 | 0.000 |
| 54 | 52 | 50 | 51 | 3 | 9.079  | 0.000 | -9.079  | -0.000 | -0.000 | 0.000 |
| 32 | 33 | 29 | 30 | 3 | 9.079  | 0.000 | -9.079  | -0.000 | -0.000 | 0.000 |
| 54 | 53 | 51 | 50 | 3 | 9.079  | 0.000 | -9.079  | -0.000 | -0.000 | 0.000 |
| 31 | 32 | 33 | 29 | 3 | 9.079  | 0.000 | -9.079  | -0.000 | -0.000 | 0.000 |
| 32 | 31 | 30 | 29 | 3 | 9.079  | 0.000 | -9.079  | -0.000 | -0.000 | 0.000 |
| 53 | 54 | 52 | 50 | 3 | 9.079  | 0.000 | -9.079  | -0.000 | -0.000 | 0.000 |
| 33 | 32 | 31 | 30 | 3 | 9.079  | 0.000 | -9.079  | -0.000 | -0.000 | 0.000 |
| 52 | 54 | 53 | 51 | 3 | 9.079  | 0.000 | -9.079  | -0.000 | -0.000 | 0.000 |
| 10 | 2  | 3  | 4  | 3 | 0.000  | 0.000 | 0.000   | -0.000 | -0.000 | 0.000 |
| 10 | 2  | 1  | 5  | 3 | 0.000  | 0.000 | 0.000   | -0.000 | -0.000 | 0.000 |
| 11 | 6  | 5  | 4  | 3 | 30.334 | 0.000 | -30.334 | -0.000 | -0.000 | 0.000 |
| 14 | 9  | 4  | 5  | 3 | 30.334 | 0.000 | -30.334 | -0.000 | -0.000 | 0.000 |
| 14 | 9  | 4  | 3  | 3 | 30.334 | 0.000 | -30.334 | -0.000 | -0.000 | 0.000 |
| 11 | 6  | 5  | 1  | 3 | 30.334 | 0.000 | -30.334 | -0.000 | -0.000 | 0.000 |
| 13 | 8  | 9  | 4  | 3 | 30.334 | 0.000 | -30.334 | -0.000 | -0.000 | 0.000 |
| 12 | 7  | 6  | 5  | 3 | 30.334 | 0.000 | -30.334 | -0.000 | -0.000 | 0.000 |
| 11 | 6  | 7  | 8  | 3 | 30.334 | 0.000 | -30.334 | -0.000 | -0.000 | 0.000 |
| 27 | 22 | 23 | 15 | 3 | 30.334 | 0.000 | -30.334 | -0.000 | -0.000 | 0.000 |
| 26 | 21 | 20 | 19 | 3 | 30.334 | 0.000 | -30.334 | -0.000 | -0.000 | 0.000 |
| 27 | 22 | 21 | 20 | 3 | 30.334 | 0.000 | -30.334 | -0.000 | -0.000 | 0.000 |
| 60 | 57 | 56 | 55 | 3 | 30.334 | 0.000 | -30.334 | -0.000 | -0.000 | 0.000 |
| 47 | 43 | 44 | 45 | 3 | 30.334 | 0.000 | -30.334 | -0.000 | -0.000 | 0.000 |
| 26 | 21 | 22 | 23 | 3 | 30.334 | 0.000 | -30.334 | -0.000 | -0.000 | 0.000 |
| 61 | 58 | 57 | 56 | 3 | 30.334 | 0.000 | -30.334 | -0.000 | -0.000 | 0.000 |
| 68 | 65 | 64 | 63 | 3 | 30.334 | 0.000 | -30.334 | -0.000 | -0.000 | 0.000 |
| 69 | 64 | 65 | 66 | 3 | 30.334 | 0.000 | -30.334 | -0.000 | -0.000 | 0.000 |
| 24 | 19 | 15 | 23 | 3 | 30.334 | 0.000 | -30.334 | -0.000 | -0.000 | 0.000 |
| 48 | 44 | 43 | 42 | 3 | 30.334 | 0.000 | -30.334 | -0.000 | -0.000 | 0.000 |
| 39 | 35 | 36 | 37 | 3 | 30.334 | 0.000 | -30.334 | -0.000 | -0.000 | 0.000 |
| 41 | 34 | 35 | 36 | 3 | 30.334 | 0.000 | -30.334 | -0.000 | -0.000 | 0.000 |
| 40 | 37 | 36 | 35 | 3 | 30.334 | 0.000 | -30.334 | -0.000 | -0.000 | 0.000 |
| 46 | 42 | 43 | 44 | 3 | 30.334 | 0.000 | -30.334 | -0.000 | -0.000 | 0.000 |
| 25 | 20 | 19 | 15 | 3 | 30.334 | 0.000 | -30.334 | -0.000 | -0.000 | 0.000 |
| 28 | 23 | 15 | 19 | 3 | 30.334 | 0.000 | -30.334 | -0.000 | -0.000 | 0.000 |
| 62 | 55 | 56 | 57 | 3 | 30.334 | 0.000 | -30.334 | -0.000 | -0.000 | 0.000 |
| 12 | 7  | 8  | 9  | 3 | 30.334 | 0.000 | -30.334 | -0.000 | -0.000 | 0.000 |
| 13 | 8  | 7  | 6  | 3 | 30.334 | 0.000 | -30.334 | -0.000 | -0.000 | 0.000 |
| 59 | 56 | 57 | 58 | 3 | 30.334 | 0.000 | -30.334 | -0.000 | -0.000 | 0.000 |
| 70 | 63 | 64 | 65 | 3 | 30.334 | 0.000 | -30.334 | -0.000 | -0.000 | 0.000 |
| 28 | 23 | 22 | 21 | 3 | 30.334 | 0.000 | -30.334 | -0.000 | -0.000 | 0.000 |
| 38 | 36 | 35 | 34 | 3 | 30.334 | 0.000 | -30.334 | -0.000 | -0.000 | 0.000 |
| 24 | 19 | 20 | 21 | 3 | 30.334 | 0.000 | -30.334 | -0.000 | -0.000 | 0.000 |
| 67 | 66 | 65 | 64 | 3 | 30.334 | 0.000 | -30.334 | -0.000 | -0.000 | 0.000 |

|    |    |    |    |   |        |       |         |        |        |       |
|----|----|----|----|---|--------|-------|---------|--------|--------|-------|
| 49 | 45 | 44 | 43 | 3 | 30.334 | 0.000 | -30.334 | -0.000 | -0.000 | 0.000 |
| 14 | 9  | 8  | 7  | 3 | 30.334 | 0.000 | -30.334 | -0.000 | -0.000 | 0.000 |
| 25 | 20 | 21 | 22 | 3 | 30.334 | 0.000 | -30.334 | -0.000 | -0.000 | 0.000 |
| 59 | 56 | 55 | 53 | 3 | 30.334 | 0.000 | -30.334 | -0.000 | -0.000 | 0.000 |
| 39 | 35 | 34 | 33 | 3 | 30.334 | 0.000 | -30.334 | -0.000 | -0.000 | 0.000 |
| 48 | 44 | 45 | 31 | 3 | 30.334 | 0.000 | -30.334 | -0.000 | -0.000 | 0.000 |
| 68 | 65 | 66 | 54 | 3 | 30.334 | 0.000 | -30.334 | -0.000 | -0.000 | 0.000 |
| 60 | 57 | 58 | 51 | 3 | 30.334 | 0.000 | -30.334 | -0.000 | -0.000 | 0.000 |
| 47 | 43 | 42 | 30 | 3 | 30.334 | 0.000 | -30.334 | -0.000 | -0.000 | 0.000 |
| 69 | 64 | 63 | 52 | 3 | 30.334 | 0.000 | -30.334 | -0.000 | -0.000 | 0.000 |
| 38 | 36 | 37 | 32 | 3 | 30.334 | 0.000 | -30.334 | -0.000 | -0.000 | 0.000 |
| 28 | 23 | 15 | 2  | 3 | 30.334 | 0.000 | -30.334 | -0.000 | -0.000 | 0.000 |
| 24 | 19 | 15 | 2  | 3 | 30.334 | 0.000 | -30.334 | -0.000 | -0.000 | 0.000 |
| 68 | 65 | 66 | 67 | 3 | 30.334 | 0.000 | -30.334 | -0.000 | -0.000 | 0.000 |
| 41 | 34 | 35 | 39 | 3 | 30.334 | 0.000 | -30.334 | -0.000 | -0.000 | 0.000 |
| 61 | 58 | 57 | 60 | 3 | 30.334 | 0.000 | -30.334 | -0.000 | -0.000 | 0.000 |
| 26 | 21 | 20 | 25 | 3 | 30.334 | 0.000 | -30.334 | -0.000 | -0.000 | 0.000 |
| 69 | 64 | 65 | 68 | 3 | 30.334 | 0.000 | -30.334 | -0.000 | -0.000 | 0.000 |
| 28 | 23 | 22 | 27 | 3 | 30.334 | 0.000 | -30.334 | -0.000 | -0.000 | 0.000 |
| 25 | 20 | 19 | 24 | 3 | 30.334 | 0.000 | -30.334 | -0.000 | -0.000 | 0.000 |
| 62 | 55 | 56 | 59 | 3 | 30.334 | 0.000 | -30.334 | -0.000 | -0.000 | 0.000 |
| 47 | 43 | 42 | 46 | 3 | 30.334 | 0.000 | -30.334 | -0.000 | -0.000 | 0.000 |
| 39 | 35 | 36 | 38 | 3 | 30.334 | 0.000 | -30.334 | -0.000 | -0.000 | 0.000 |
| 12 | 7  | 6  | 11 | 3 | 30.334 | 0.000 | -30.334 | -0.000 | -0.000 | 0.000 |
| 48 | 44 | 43 | 47 | 3 | 30.334 | 0.000 | -30.334 | -0.000 | -0.000 | 0.000 |
| 27 | 22 | 21 | 26 | 3 | 30.334 | 0.000 | -30.334 | -0.000 | -0.000 | 0.000 |
| 60 | 57 | 56 | 59 | 3 | 30.334 | 0.000 | -30.334 | -0.000 | -0.000 | 0.000 |
| 13 | 8  | 7  | 12 | 3 | 30.334 | 0.000 | -30.334 | -0.000 | -0.000 | 0.000 |
| 49 | 45 | 44 | 48 | 3 | 30.334 | 0.000 | -30.334 | -0.000 | -0.000 | 0.000 |
| 70 | 63 | 64 | 69 | 3 | 30.334 | 0.000 | -30.334 | -0.000 | -0.000 | 0.000 |
| 14 | 9  | 8  | 13 | 3 | 30.334 | 0.000 | -30.334 | -0.000 | -0.000 | 0.000 |
| 40 | 37 | 36 | 38 | 3 | 30.334 | 0.000 | -30.334 | -0.000 | -0.000 | 0.000 |
| 61 | 58 | 51 | 50 | 3 | 30.334 | 0.000 | -30.334 | -0.000 | -0.000 | 0.000 |
| 70 | 63 | 52 | 50 | 3 | 30.334 | 0.000 | -30.334 | -0.000 | -0.000 | 0.000 |
| 46 | 42 | 30 | 29 | 3 | 30.334 | 0.000 | -30.334 | -0.000 | -0.000 | 0.000 |
| 41 | 34 | 33 | 29 | 3 | 30.334 | 0.000 | -30.334 | -0.000 | -0.000 | 0.000 |
| 49 | 45 | 31 | 30 | 3 | 30.334 | 0.000 | -30.334 | -0.000 | -0.000 | 0.000 |
| 67 | 66 | 54 | 52 | 3 | 30.334 | 0.000 | -30.334 | -0.000 | -0.000 | 0.000 |
| 62 | 55 | 53 | 51 | 3 | 30.334 | 0.000 | -30.334 | -0.000 | -0.000 | 0.000 |
| 67 | 66 | 54 | 53 | 3 | 30.334 | 0.000 | -30.334 | -0.000 | -0.000 | 0.000 |
| 61 | 58 | 51 | 53 | 3 | 30.334 | 0.000 | -30.334 | -0.000 | -0.000 | 0.000 |
| 49 | 45 | 31 | 32 | 3 | 30.334 | 0.000 | -30.334 | -0.000 | -0.000 | 0.000 |
| 46 | 42 | 30 | 31 | 3 | 30.334 | 0.000 | -30.334 | -0.000 | -0.000 | 0.000 |
| 40 | 37 | 32 | 33 | 3 | 30.334 | 0.000 | -30.334 | -0.000 | -0.000 | 0.000 |
| 41 | 34 | 33 | 32 | 3 | 30.334 | 0.000 | -30.334 | -0.000 | -0.000 | 0.000 |
| 62 | 55 | 53 | 54 | 3 | 30.334 | 0.000 | -30.334 | -0.000 | -0.000 | 0.000 |
| 40 | 37 | 32 | 31 | 3 | 30.334 | 0.000 | -30.334 | -0.000 | -0.000 | 0.000 |
| 70 | 63 | 52 | 54 | 3 | 30.334 | 0.000 | -30.334 | -0.000 | -0.000 | 0.000 |
| 18 | 10 | 2  | 15 | 3 | 0.967  | 2.900 | 0.000   | -3.866 | -0.000 | 0.000 |
| 16 | 10 | 2  | 15 | 3 | 0.967  | 2.900 | 0.000   | -3.866 | -0.000 | 0.000 |
| 17 | 10 | 2  | 15 | 3 | 0.967  | 2.900 | 0.000   | -3.866 | -0.000 | 0.000 |
| 16 | 10 | 2  | 1  | 3 | 0.967  | 2.900 | 0.000   | -3.866 | -0.000 | 0.000 |
| 18 | 10 | 2  | 3  | 3 | 0.967  | 2.900 | 0.000   | -3.866 | -0.000 | 0.000 |
| 18 | 10 | 2  | 1  | 3 | 0.967  | 2.900 | 0.000   | -3.866 | -0.000 | 0.000 |
| 17 | 10 | 2  | 1  | 3 | 0.967  | 2.900 | 0.000   | -3.866 | -0.000 | 0.000 |
| 17 | 10 | 2  | 3  | 3 | 0.967  | 2.900 | 0.000   | -3.866 | -0.000 | 0.000 |
| 16 | 10 | 2  | 3  | 3 | 0.967  | 2.900 | 0.000   | -3.866 | -0.000 | 0.000 |

[ pairs ]

|   |   |   |
|---|---|---|
| 2 | 6 | 1 |
| 1 | 7 | 1 |
| 3 | 6 | 1 |
| 1 | 9 | 1 |
| 4 | 7 | 1 |



3 8 1  
2 9 1  
1 11 1  
5 8 1  
4 10 1  
6 9 1  
5 10 1  
4 11 1  
5 12 1  
4 13 1  
3 14 1  
1 16 1  
1 17 1  
8 11 1  
6 13 1  
5 14 1  
4 15 1  
3 16 1  
1 18 1  
5 15 1  
3 17 1  
1 19 1  
9 12 1  
7 14 1  
3 18 1  
3 19 1  
2 20 1  
11 12 1  
2 22 1  
1 23 1  
12 13 1  
3 23 1  
2 24 1  
13 14 1  
10 19 1  
2 28 1  
1 29 1  
15 16 1  
15 17 1  
2 30 1  
15 18 1  
10 23 1  
5 29 1  
4 30 1  
3 31 1  
3 32 1  
2 33 1  
15 21 1  
4 33 1  
3 34 1  
9 29 1  
10 29 1  
15 25 1  
19 22 1  
15 27 1  
20 23 1  
15 29 1  
21 24 1  
19 26 1  
3 42 1  
23 24 1  
22 25 1  
20 27 1  
19 28 1

24 25 1  
23 26 1  
21 28 1  
25 26 1  
26 27 1  
3 50 1  
2 51 1  
4 50 1  
2 52 1  
1 53 1  
27 28 1  
1 54 1  
6 50 1  
5 51 1  
5 52 1  
1 58 1  
10 50 1  
30 34 1  
29 35 1  
1 63 1  
31 34 1  
15 50 1  
29 37 1  
32 35 1  
31 36 1  
30 37 1  
33 36 1  
32 38 1  
29 41 1  
34 37 1  
31 40 1  
34 38 1  
33 39 1  
29 43 1  
33 40 1  
32 41 1  
32 42 1  
31 43 1  
30 44 1  
29 45 1  
35 40 1  
33 42 1  
29 46 1  
37 39 1  
32 44 1  
38 39 1  
36 41 1  
31 46 1  
30 47 1  
38 40 1  
33 45 1  
31 48 1  
30 49 1  
39 41 1  
32 49 1  
37 45 1  
42 45 1  
44 46 1  
42 48 1  
45 47 1  
43 49 1  
46 47 1  
47 48 1  
48 49 1

```
50 55 1
52 55 1
51 56 1
50 57 1
54 56 1
53 57 1
52 58 1
51 60 1
50 61 1
54 58 1
53 59 1
55 58 1
51 62 1
53 61 1
51 63 1
50 64 1
55 60 1
54 62 1
53 63 1
50 66 1
58 59 1
56 61 1
52 65 1
51 66 1
54 64 1
53 65 1
59 60 1
57 62 1
52 67 1
53 67 1
50 70 1
60 61 1
59 62 1
55 66 1
52 69 1
54 68 1
54 70 1
63 66 1
64 67 1
63 68 1
67 68 1
66 69 1
65 70 1
68 69 1
69 70 1
```

```
#ifdef POSRES
#include "posre.itp"
#endif
```

### Atom types (OPLS-AA Force Field)

```
; This force field uses a format that requires Gromacs 3.1.4 or later.
;
; References for the OPLS-AA force field:
;
; W. L. Jorgensen, D. S. Maxwell, and J. Tirado-Rives,
; J. Am. Chem. Soc. 118, 11225-11236 (1996).
```

; W. L. Jorgensen and N. A. McDonald, *Theochem* 424, 145-155 (1998).  
 ; W. L. Jorgensen and N. A. McDonald, *J. Phys. Chem. B* 102, 8049-8059 (1998).  
 ; R. C. Rizzo and W. L. Jorgensen, *J. Am. Chem. Soc.* 121, 4827-4836 (1999).  
 ; M. L. Price, D. Ostrovsky, and W. L. Jorgensen, *J. Comp. Chem.* (2001).  
 ; E. K. Watkins and W. L. Jorgensen, *J. Phys. Chem. A* 105, 4118-4125 (2001).  
 ; G. A. Kaminski, R.A. Friesner, J.Tirado-Rives and W.L. Jorgensen, *J. Phys. Chem. B* 105, 6474 (2001).  
 ;

[ defaults ]

```
; nbfunc  comb-rule  gen-pairs  fudgeLJ  fudgeQQ
1         3         yes       0.5  0.5
```

[ atomtypes ]

```
opls_818 H818  1.0080  0.000  A  2.50000E-01  1.25520E-01
opls_847 C847 12.0110  0.000  A  3.55000E-01  3.17984E-01
opls_842 H842  1.0080  0.000  A  2.50000E-01  1.25520E-01
opls_805 C805 12.0110  0.000  A  3.50000E-01  2.76144E-01
opls_833 N833 14.0070  0.000  A  3.25000E-01  7.11280E-01
opls_843 H843  1.0080  0.000  A  2.50000E-01  1.25520E-01
opls_846 H846  1.0080  0.000  A  2.42000E-01  1.25520E-01
opls_813 H813  1.0080  0.000  A  2.50000E-01  1.25520E-01
opls_844 H844  1.0080  0.000  A  2.50000E-01  1.25520E-01
opls_802 C802 12.0110  0.000  A  3.50000E-01  2.76144E-01
opls_815 H815  1.0080  0.000  A  2.50000E-01  1.25520E-01
opls_801 C801 12.0110  0.000  A  3.50000E-01  2.76144E-01
opls_822 H822  1.0080  0.000  A  2.50000E-01  1.25520E-01
opls_803 C803 12.0110  0.000  A  3.50000E-01  2.76144E-01
opls_834 N834 14.0070  0.000  A  3.25000E-01  7.11280E-01
opls_824 C824 12.0110  0.000  A  3.55000E-01  3.17984E-01
opls_814 H814  1.0080  0.000  A  2.50000E-01  1.25520E-01
opls_821 H821  1.0080  0.000  A  2.50000E-01  1.25520E-01
opls_823 C823 12.0110  0.000  A  3.55000E-01  2.92880E-01
opls_811 H811  1.0080  0.000  A  2.50000E-01  1.25520E-01
opls_838 C838 12.0110  0.000  A  3.55000E-01  3.17984E-01
opls_841 C841 12.0110  0.000  A  3.50000E-01  2.76144E-01
opls_810 H810  1.0080  0.000  A  2.50000E-01  1.25520E-01
opls_816 H816  1.0080  0.000  A  2.50000E-01  1.25520E-01
opls_831 C831 12.0110  0.000  A  3.55000E-01  3.17984E-01
opls_837 H837  1.0080  0.000  A  2.42000E-01  1.25520E-01
opls_806 C806 12.0110  0.000  A  3.50000E-01  2.76144E-01
opls_836 C836 12.0110  0.000  A  3.55000E-01  3.17984E-01
opls_827 H827  1.0080  0.000  A  2.42000E-01  1.25520E-01
opls_820 C820 12.0110  0.000  A  3.50000E-01  2.76144E-01
opls_835 C835 12.0110  0.000  A  3.55000E-01  2.92880E-01
opls_819 H819  1.0080  0.000  A  2.50000E-01  1.25520E-01
opls_804 C804 12.0110  0.000  A  3.50000E-01  2.76144E-01
opls_808 H808  1.0080  0.000  A  0.00000E+00  0.00000E+00
opls_829 C829 12.0110  0.000  A  3.55000E-01  3.17984E-01
opls_845 C845 12.0110  0.000  A  3.55000E-01  3.17984E-01
opls_825 H825  1.0080  0.000  A  2.42000E-01  1.25520E-01
opls_807 H807  1.0080  0.000  A  0.00000E+00  0.00000E+00
opls_826 C826 12.0110  0.000  A  3.55000E-01  3.17984E-01
opls_839 H839  1.0080  0.000  A  2.42000E-01  1.25520E-01
opls_812 H812  1.0080  0.000  A  2.50000E-01  1.25520E-01
opls_832 H832  1.0080  0.000  A  2.42000E-01  1.25520E-01
opls_809 H809  1.0080  0.000  A  2.50000E-01  1.25520E-01
opls_828 C828 12.0110  0.000  A  3.55000E-01  2.92880E-01
opls_817 H817  1.0080  0.000  A  2.50000E-01  1.25520E-01
opls_848 H848  1.0080  0.000  A  2.42000E-01  1.25520E-01
opls_840 C840 12.0110  0.000  A  3.55000E-01  2.92880E-01
opls_830 H830  1.0080  0.000  A  2.42000E-01  1.25520E-01
opls_800 N800 14.0070  0.000  A  3.25000E-01  7.11280E-01
opls_867 H867  1.0080  0.000  A  2.42000E-01  1.25520E-01
opls_814 C814 12.0110  0.000  A  3.50000E-01  2.76144E-01
```

|          |      |         |       |   |             |             |
|----------|------|---------|-------|---|-------------|-------------|
| opls_842 | H842 | 1.0080  | 0.000 | A | 2.50000E-01 | 1.25520E-01 |
| opls_845 | C845 | 12.0110 | 0.000 | A | 3.55000E-01 | 2.92880E-01 |
| opls_820 | C820 | 12.0110 | 0.000 | A | 3.50000E-01 | 3.34720E-01 |
| opls_809 | O809 | 15.9990 | 0.000 | A | 2.90000E-01 | 5.85760E-01 |
| opls_816 | C816 | 12.0110 | 0.000 | A | 3.55000E-01 | 2.92880E-01 |
| opls_817 | C817 | 12.0110 | 0.000 | A | 3.55000E-01 | 2.92880E-01 |
| opls_858 | H858 | 1.0080  | 0.000 | A | 2.50000E-01 | 1.25520E-01 |
| opls_870 | C870 | 12.0110 | 0.000 | A | 3.55000E-01 | 2.92880E-01 |
| opls_843 | H843 | 1.0080  | 0.000 | A | 2.50000E-01 | 1.25520E-01 |
| opls_848 | H848 | 1.0080  | 0.000 | A | 2.42000E-01 | 1.25520E-01 |
| opls_836 | H836 | 1.0080  | 0.000 | A | 2.50000E-01 | 1.25520E-01 |
| opls_835 | H835 | 1.0080  | 0.000 | A | 2.50000E-01 | 1.25520E-01 |
| opls_851 | H851 | 1.0080  | 0.000 | A | 2.42000E-01 | 1.25520E-01 |
| opls_834 | H834 | 1.0080  | 0.000 | A | 2.50000E-01 | 1.25520E-01 |
| opls_812 | O812 | 15.9990 | 0.000 | A | 2.90000E-01 | 5.85760E-01 |
| opls_860 | H860 | 1.0080  | 0.000 | A | 2.50000E-01 | 1.25520E-01 |
| opls_806 | O806 | 15.9990 | 0.000 | A | 2.90000E-01 | 5.85760E-01 |
| opls_811 | C811 | 12.0110 | 0.000 | A | 3.50000E-01 | 2.76144E-01 |
| opls_866 | H866 | 1.0080  | 0.000 | A | 2.42000E-01 | 1.25520E-01 |
| opls_861 | H861 | 1.0080  | 0.000 | A | 2.50000E-01 | 1.25520E-01 |
| opls_823 | C823 | 12.0110 | 0.000 | A | 3.50000E-01 | 2.76144E-01 |
| opls_825 | O825 | 15.9990 | 0.000 | A | 2.90000E-01 | 5.85760E-01 |
| opls_857 | H857 | 1.0080  | 0.000 | A | 2.50000E-01 | 1.25520E-01 |
| opls_807 | C807 | 12.0110 | 0.000 | A | 3.50000E-01 | 2.76144E-01 |
| opls_875 | H875 | 1.0080  | 0.000 | A | 2.42000E-01 | 1.25520E-01 |
| opls_850 | C850 | 12.0110 | 0.000 | A | 3.55000E-01 | 2.92880E-01 |
| opls_822 | O822 | 15.9990 | 0.000 | A | 2.90000E-01 | 5.85760E-01 |
| opls_838 | H838 | 1.0080  | 0.000 | A | 2.50000E-01 | 1.25520E-01 |
| opls_818 | C818 | 12.0110 | 0.000 | A | 3.55000E-01 | 2.92880E-01 |
| opls_805 | C805 | 12.0110 | 0.000 | A | 3.50000E-01 | 3.34720E-01 |
| opls_827 | C827 | 12.0110 | 0.000 | A | 3.50000E-01 | 2.76144E-01 |
| opls_821 | C821 | 12.0110 | 0.000 | A | 3.55000E-01 | 2.92880E-01 |
| opls_844 | H844 | 1.0080  | 0.000 | A | 2.42000E-01 | 1.25520E-01 |
| opls_801 | C801 | 12.0110 | 0.000 | A | 3.55000E-01 | 2.92880E-01 |
| opls_847 | H847 | 1.0080  | 0.000 | A | 2.42000E-01 | 1.25520E-01 |
| opls_837 | H837 | 1.0080  | 0.000 | A | 2.50000E-01 | 1.25520E-01 |
| opls_824 | C824 | 12.0110 | 0.000 | A | 3.50000E-01 | 2.76144E-01 |
| opls_852 | H852 | 1.0080  | 0.000 | A | 2.50000E-01 | 1.25520E-01 |
| opls_869 | H869 | 1.0080  | 0.000 | A | 2.42000E-01 | 1.25520E-01 |
| opls_815 | O815 | 15.9990 | 0.000 | A | 2.90000E-01 | 5.85760E-01 |
| opls_804 | C804 | 12.0110 | 0.000 | A | 3.55000E-01 | 2.92880E-01 |
| opls_868 | H868 | 1.0080  | 0.000 | A | 2.42000E-01 | 1.25520E-01 |
| opls_832 | H832 | 1.0080  | 0.000 | A | 2.50000E-01 | 1.25520E-01 |
| opls_874 | H874 | 1.0080  | 0.000 | A | 2.42000E-01 | 1.25520E-01 |
| opls_819 | C819 | 12.0110 | 0.000 | A | 3.50000E-01 | 3.34720E-01 |
| opls_872 | H872 | 1.0080  | 0.000 | A | 2.42000E-01 | 1.25520E-01 |
| opls_829 | C829 | 12.0110 | 0.000 | A | 3.50000E-01 | 2.76144E-01 |
| opls_862 | H862 | 1.0080  | 0.000 | A | 2.50000E-01 | 1.25520E-01 |
| opls_833 | H833 | 1.0080  | 0.000 | A | 2.50000E-01 | 1.25520E-01 |
| opls_802 | C802 | 12.0110 | 0.000 | A | 3.55000E-01 | 2.92880E-01 |
| opls_856 | H856 | 1.0080  | 0.000 | A | 2.50000E-01 | 1.25520E-01 |
| opls_813 | C813 | 12.0110 | 0.000 | A | 3.50000E-01 | 2.76144E-01 |
| opls_846 | C846 | 12.0110 | 0.000 | A | 3.55000E-01 | 2.92880E-01 |
| opls_849 | C849 | 12.0110 | 0.000 | A | 3.55000E-01 | 2.92880E-01 |
| opls_841 | H841 | 1.0080  | 0.000 | A | 2.50000E-01 | 1.25520E-01 |
| opls_864 | C864 | 12.0110 | 0.000 | A | 3.55000E-01 | 2.92880E-01 |
| opls_810 | C810 | 12.0110 | 0.000 | A | 3.50000E-01 | 2.76144E-01 |
| opls_855 | H855 | 1.0080  | 0.000 | A | 2.50000E-01 | 1.25520E-01 |
| opls_839 | H839 | 1.0080  | 0.000 | A | 2.50000E-01 | 1.25520E-01 |
| opls_828 | O828 | 15.9990 | 0.000 | A | 2.90000E-01 | 5.85760E-01 |
| opls_803 | C803 | 12.0110 | 0.000 | A | 3.55000E-01 | 2.92880E-01 |
| opls_808 | C808 | 12.0110 | 0.000 | A | 3.50000E-01 | 2.76144E-01 |
| opls_840 | H840 | 1.0080  | 0.000 | A | 2.50000E-01 | 1.25520E-01 |
| opls_831 | O831 | 15.9990 | 0.000 | A | 2.90000E-01 | 5.85760E-01 |

|          |        |          |        |   |             |             |
|----------|--------|----------|--------|---|-------------|-------------|
| opls_873 | H873   | 1.0080   | 0.000  | A | 2.42000E-01 | 1.25520E-01 |
| opls_854 | H854   | 1.0080   | 0.000  | A | 2.50000E-01 | 1.25520E-01 |
| opls_826 | C826   | 12.0110  | 0.000  | A | 3.50000E-01 | 2.76144E-01 |
| opls_830 | C830   | 12.0110  | 0.000  | A | 3.50000E-01 | 2.76144E-01 |
| opls_863 | H863   | 1.0080   | 0.000  | A | 2.50000E-01 | 1.25520E-01 |
| opls_865 | C865   | 12.0110  | 0.000  | A | 3.55000E-01 | 2.92880E-01 |
| opls_853 | H853   | 1.0080   | 0.000  | A | 2.50000E-01 | 1.25520E-01 |
| opls_800 | C800   | 12.0110  | 0.000  | A | 3.50000E-01 | 3.34720E-01 |
| opls_871 | C871   | 12.0110  | 0.000  | A | 3.55000E-01 | 2.92880E-01 |
| opls_859 | H859   | 1.0080   | 0.000  | A | 2.50000E-01 | 1.25520E-01 |
| opls_151 | Cl 17  | 35.45300 | -0.200 | A | 3.40000e-01 | 1.25520e+00 |
| opls_152 | CT 6   | 12.01100 | -0.006 | A | 3.50000e-01 | 2.76144e-01 |
| opls_153 | HC 1   | 1.00800  | 0.103  | A | 2.50000e-01 | 1.25520e-01 |
| opls_401 | Cl- 17 | 35.45300 | -1.000 | A | 4.41724e-01 | 4.92833e-01 |
| opls_753 | NZ 7   | 14.00670 | -0.560 | A | 3.20000e-01 | 7.11280e-01 |
| opls_754 | CZ 6   | 12.01100 | 0.460  | A | 3.30000e-01 | 2.76144e-01 |
| opls_755 | CT 6   | 12.01100 | -0.080 | A | 3.30000e-01 | 2.76144e-01 |
| opls_756 | CT 6   | 12.01100 | -0.020 | A | 3.30000e-01 | 2.76144e-01 |
| opls_757 | CT 6   | 12.01100 | 0.040  | A | 3.30000e-01 | 2.76144e-01 |
| opls_758 | CT 6   | 12.01100 | 0.100  | A | 3.30000e-01 | 2.76144e-01 |
| opls_759 | HC 1   | 1.00800  | 0.060  | A | 2.50000e-01 | 6.27600e-02 |
| ML       | ML 0   | 0.000000 | 0.000  | A | 0.00000e+00 | 0.00000e+00 |

### Gro-coordinates file (Molecular rotor, Phe-Orth rotamer)

LIGPARGEN GENERATED GRO FILE

70

|      |     |    |        |        |        |
|------|-----|----|--------|--------|--------|
| 1GMR | H00 | 1  | 0.100  | 0.100  | 0.000  |
| 1GMR | C01 | 2  | -0.008 | 0.100  | 0.000  |
| 1GMR | C02 | 3  | -0.077 | 0.100  | 0.122  |
| 1GMR | C03 | 4  | -0.077 | 0.095  | -0.120 |
| 1GMR | H04 | 5  | -0.022 | 0.100  | 0.215  |
| 1GMR | C05 | 6  | -0.216 | 0.095  | 0.124  |
| 1GMR | H06 | 7  | -0.023 | 0.090  | -0.214 |
| 1GMR | C07 | 8  | -0.216 | 0.094  | -0.118 |
| 1GMR | H08 | 9  | -0.269 | 0.089  | 0.218  |
| 1GMR | C09 | 10 | -0.285 | 0.097  | 0.003  |
| 1GMR | C0A | 11 | -0.310 | 0.067  | -0.228 |
| 1GMR | C0B | 12 | -0.429 | 0.076  | -0.021 |
| 1GMR | C0C | 13 | -0.290 | 0.099  | -0.358 |
| 1GMR | C0D | 14 | -0.431 | -0.003 | -0.160 |
| 1GMR | C0E | 15 | -0.529 | 0.118  | 0.060  |
| 1GMR | C0F | 16 | -0.197 | 0.205  | -0.407 |
| 1GMR | C0G | 17 | -0.351 | 0.042  | -0.482 |
| 1GMR | C0H | 18 | -0.393 | -0.151 | -0.134 |
| 1GMR | C0I | 19 | -0.562 | 0.017  | -0.239 |
| 1GMR | C0J | 20 | -0.518 | 0.229  | 0.159  |
| 1GMR | C0K | 21 | -0.669 | 0.069  | 0.072  |
| 1GMR | C0M | 22 | -0.128 | 0.306  | -0.340 |
| 1GMR | C0N | 23 | -0.199 | 0.206  | -0.548 |
| 1GMR | C0O | 24 | -0.440 | -0.064 | -0.503 |
| 1GMR | C0P | 25 | -0.292 | 0.103  | -0.594 |
| 1GMR | C0Q | 26 | -0.435 | -0.217 | -0.019 |
| 1GMR | C0R | 27 | -0.312 | -0.221 | -0.223 |
| 1GMR | H0S | 28 | -0.610 | -0.078 | -0.265 |
| 1GMR | H0T | 29 | -0.634 | 0.075  | -0.182 |
| 1GMR | H0U | 30 | -0.545 | 0.071  | -0.331 |
| 1GMR | C0V | 31 | -0.420 | 0.326  | 0.179  |
| 1GMR | C0W | 32 | -0.640 | 0.241  | 0.228  |
| 1GMR | C0X | 33 | -0.738 | -0.036 | 0.012  |
| 1GMR | C0Y | 34 | -0.732 | 0.140  | 0.177  |
| 1GMR | H0Z | 35 | -0.130 | 0.313  | -0.233 |
| 1GMR | C10 | 36 | -0.056 | 0.400  | -0.413 |

```

1GMR C11 37 -0.127 0.300 -0.621
1GMR H12 38 -0.484 -0.117 -0.421
1GMR C13 39 -0.472 -0.102 -0.633
1GMR C14 40 -0.322 0.064 -0.723
1GMR H15 41 -0.491 -0.164 0.057
1GMR C16 42 -0.405 -0.351 0.002
1GMR H17 43 -0.270 -0.172 -0.310
1GMR C18 44 -0.282 -0.356 -0.203
1GMR H19 45 -0.328 0.324 0.124
1GMR C1A 46 -0.441 0.426 0.273
1GMR C1B 47 -0.661 0.341 0.322
1GMR H1C 48 -0.694 -0.096 -0.065
1GMR C1D 49 -0.868 -0.065 0.052
1GMR C1E 50 -0.862 0.110 0.217
1GMR H1F 51 -0.003 0.478 -0.361
1GMR C1G 52 -0.052 0.395 -0.553
1GMR H1H 53 -0.131 0.300 -0.729
1GMR H1I 54 -0.541 -0.184 -0.648
1GMR C1J 55 -0.416 -0.037 -0.743
1GMR H1K 56 -0.274 0.111 -0.808
1GMR H1M 57 -0.440 -0.400 0.093
1GMR C1N 58 -0.333 -0.423 -0.092
1GMR H1O 59 -0.218 -0.407 -0.274
1GMR H1P 60 -0.364 0.501 0.288
1GMR C1Q 61 -0.559 0.432 0.347
1GMR H1R 62 -0.756 0.349 0.373
1GMR H1S 63 -0.921 -0.147 0.004
1GMR C1T 64 -0.931 0.009 0.151
1GMR H1U 65 -0.907 0.165 0.299
1GMR H1V 66 0.010 0.464 -0.607
1GMR H1W 67 -0.446 -0.066 -0.843
1GMR H1X 68 -0.317 -0.529 -0.080
1GMR H1Y 69 -0.570 0.507 0.425
1GMR H1Z 70 -1.034 -0.012 0.178

```

### Topology file (Molecular rotor, Phe-Orth rotamer)

```

;
; GENERATED BY LigParGen Server
; Jorgensen Lab @ Yale University
;
[ atomtypes ]
opls_863 C863 12.0110 0.000 A 3.55000E-01 2.92880E-01
opls_854 C854 12.0110 0.000 A 3.55000E-01 2.92880E-01
opls_825 C825 12.0110 0.000 A 3.55000E-01 2.92880E-01
opls_858 H858 1.0080 0.000 A 2.42000E-01 1.25520E-01
opls_839 C839 12.0110 0.000 A 3.55000E-01 2.92880E-01
opls_859 H859 1.0080 0.000 A 2.42000E-01 1.25520E-01
opls_844 H844 1.0080 0.000 A 2.42000E-01 1.25520E-01
opls_845 C845 12.0110 0.000 A 3.55000E-01 2.92880E-01
opls_809 C809 12.0110 0.000 A 3.55000E-01 3.17984E-01
opls_811 C811 12.0110 0.000 A 3.55000E-01 2.92880E-01
opls_810 C810 12.0110 0.000 A 3.55000E-01 2.92880E-01
opls_817 C817 12.0110 0.000 A 3.55000E-01 2.92880E-01
opls_855 H855 1.0080 0.000 A 2.42000E-01 1.25520E-01
opls_867 H867 1.0080 0.000 A 2.42000E-01 1.25520E-01
opls_818 C818 12.0110 0.000 A 3.50000E-01 2.76144E-01
opls_856 H856 1.0080 0.000 A 2.42000E-01 1.25520E-01
opls_828 H828 1.0080 0.000 A 2.50000E-01 1.25520E-01
opls_835 C835 12.0110 0.000 A 3.55000E-01 2.92880E-01
opls_852 H852 1.0080 0.000 A 2.42000E-01 1.25520E-01
opls_824 C824 12.0110 0.000 A 3.55000E-01 2.92880E-01

```

```

opls_853 H853 1.0080 0.000 A 2.42000E-01 1.25520E-01
opls_866 H866 1.0080 0.000 A 2.42000E-01 1.25520E-01
opls_827 H827 1.0080 0.000 A 2.50000E-01 1.25520E-01
opls_841 C841 12.0110 0.000 A 3.55000E-01 2.92880E-01
opls_862 H862 1.0080 0.000 A 2.42000E-01 1.25520E-01
opls_860 C860 12.0110 0.000 A 3.55000E-01 2.92880E-01
opls_846 C846 12.0110 0.000 A 3.55000E-01 2.92880E-01
opls_804 H804 1.0080 0.000 A 2.42000E-01 1.25520E-01
opls_829 H829 1.0080 0.000 A 2.50000E-01 1.25520E-01
opls_821 C821 12.0110 0.000 A 3.55000E-01 2.92880E-01
opls_814 C814 12.0110 0.000 A 3.55000E-01 3.17984E-01
opls_816 C816 12.0110 0.000 A 3.55000E-01 2.92880E-01
opls_840 H840 1.0080 0.000 A 2.42000E-01 1.25520E-01
opls_801 C801 12.0110 0.000 A 3.55000E-01 2.92880E-01
opls_847 H847 1.0080 0.000 A 2.42000E-01 1.25520E-01
opls_819 C819 12.0110 0.000 A 3.55000E-01 2.92880E-01
opls_869 H869 1.0080 0.000 A 2.42000E-01 1.25520E-01
opls_805 C805 12.0110 0.000 A 3.55000E-01 2.92880E-01
opls_807 C807 12.0110 0.000 A 3.55000E-01 3.17984E-01
opls_868 H868 1.0080 0.000 A 2.42000E-01 1.25520E-01
opls_837 H837 1.0080 0.000 A 2.42000E-01 1.25520E-01
opls_848 C848 12.0110 0.000 A 3.55000E-01 2.92880E-01
opls_815 C815 12.0110 0.000 A 3.55000E-01 2.92880E-01
opls_832 C832 12.0110 0.000 A 3.55000E-01 2.92880E-01
opls_864 H864 1.0080 0.000 A 2.42000E-01 1.25520E-01
opls_813 C813 12.0110 0.000 A 3.50000E-01 2.76144E-01
opls_806 H806 1.0080 0.000 A 2.42000E-01 1.25520E-01
opls_802 C802 12.0110 0.000 A 3.55000E-01 2.92880E-01
opls_812 C812 12.0110 0.000 A 3.55000E-01 3.17984E-01
opls_849 C849 12.0110 0.000 A 3.55000E-01 2.92880E-01
opls_834 H834 1.0080 0.000 A 2.42000E-01 1.25520E-01
opls_833 C833 12.0110 0.000 A 3.55000E-01 2.92880E-01
opls_850 H850 1.0080 0.000 A 2.42000E-01 1.25520E-01
opls_823 C823 12.0110 0.000 A 3.55000E-01 2.92880E-01
opls_826 C826 12.0110 0.000 A 3.55000E-01 2.92880E-01
opls_830 C830 12.0110 0.000 A 3.55000E-01 2.92880E-01
opls_861 H861 1.0080 0.000 A 2.42000E-01 1.25520E-01
opls_800 H800 1.0080 0.000 A 2.42000E-01 1.25520E-01
opls_803 C803 12.0110 0.000 A 3.55000E-01 2.92880E-01
opls_865 H865 1.0080 0.000 A 2.42000E-01 1.25520E-01
opls_820 C820 12.0110 0.000 A 3.55000E-01 2.92880E-01
opls_857 C857 12.0110 0.000 A 3.55000E-01 2.92880E-01
opls_822 C822 12.0110 0.000 A 3.55000E-01 2.92880E-01
opls_838 C838 12.0110 0.000 A 3.55000E-01 2.92880E-01
opls_808 H808 1.0080 0.000 A 2.42000E-01 1.25520E-01
opls_836 C836 12.0110 0.000 A 3.55000E-01 2.92880E-01
opls_842 H842 1.0080 0.000 A 2.42000E-01 1.25520E-01
opls_843 C843 12.0110 0.000 A 3.55000E-01 2.92880E-01
opls_831 C831 12.0110 0.000 A 3.55000E-01 2.92880E-01
opls_851 C851 12.0110 0.000 A 3.55000E-01 2.92880E-01

```

[ moleculetype ]

; Name nrexcl

GMR 3

[ atoms ]

```

; nr type resnr residue atom cgnr charge mass
1 opls_800 1 GMR H00 1 0.1424 1.0080
2 opls_801 1 GMR C01 1 -0.1333 12.0110
3 opls_802 1 GMR C02 1 -0.1333 12.0110
4 opls_803 1 GMR C03 1 -0.1069 12.0110
5 opls_804 1 GMR H04 1 0.1427 1.0080
6 opls_805 1 GMR C05 1 -0.105 12.0110
7 opls_806 1 GMR H06 1 0.1565 1.0080
8 opls_807 1 GMR C07 1 -0.0532 12.0110
9 opls_808 1 GMR H08 1 0.1558 1.0080

```



|    |          |   |     |     |   |         |         |
|----|----------|---|-----|-----|---|---------|---------|
| 10 | opls_809 | 1 | GMR | C09 | 1 | -0.0542 | 12.0110 |
| 11 | opls_810 | 1 | GMR | COA | 1 | -0.0167 | 12.0110 |
| 12 | opls_811 | 1 | GMR | COB | 1 | -0.0172 | 12.0110 |
| 13 | opls_812 | 1 | GMR | COC | 1 | -0.0218 | 12.0110 |
| 14 | opls_813 | 1 | GMR | COD | 1 | 0.0863  | 12.0110 |
| 15 | opls_814 | 1 | GMR | COE | 1 | -0.02   | 12.0110 |
| 16 | opls_815 | 1 | GMR | COF | 1 | -0.0496 | 12.0110 |
| 17 | opls_816 | 1 | GMR | COG | 1 | -0.0472 | 12.0110 |
| 18 | opls_817 | 1 | GMR | COH | 1 | -0.0782 | 12.0110 |
| 19 | opls_818 | 1 | GMR | COI | 1 | -0.2413 | 12.0110 |
| 20 | opls_819 | 1 | GMR | COJ | 1 | -0.0488 | 12.0110 |
| 21 | opls_820 | 1 | GMR | COK | 1 | -0.0456 | 12.0110 |
| 22 | opls_821 | 1 | GMR | COM | 1 | -0.1112 | 12.0110 |
| 23 | opls_822 | 1 | GMR | CON | 1 | -0.0488 | 12.0110 |
| 24 | opls_823 | 1 | GMR | COO | 1 | -0.1176 | 12.0110 |
| 25 | opls_824 | 1 | GMR | COP | 1 | -0.0434 | 12.0110 |
| 26 | opls_825 | 1 | GMR | COQ | 1 | -0.1261 | 12.0110 |
| 27 | opls_826 | 1 | GMR | COR | 1 | -0.1269 | 12.0110 |
| 28 | opls_827 | 1 | GMR | H0S | 1 | 0.1052  | 1.0080  |
| 29 | opls_828 | 1 | GMR | H0T | 1 | 0.1052  | 1.0080  |
| 30 | opls_829 | 1 | GMR | H0U | 1 | 0.1052  | 1.0080  |
| 31 | opls_830 | 1 | GMR | COV | 1 | -0.11   | 12.0110 |
| 32 | opls_831 | 1 | GMR | COW | 1 | -0.0486 | 12.0110 |
| 33 | opls_832 | 1 | GMR | COX | 2 | -0.1171 | 12.0110 |
| 34 | opls_833 | 1 | GMR | COY | 2 | -0.0438 | 12.0110 |
| 35 | opls_834 | 1 | GMR | H0Z | 2 | 0.1508  | 1.0080  |
| 36 | opls_835 | 1 | GMR | C10 | 2 | -0.1388 | 12.0110 |
| 37 | opls_836 | 1 | GMR | C11 | 2 | -0.1094 | 12.0110 |
| 38 | opls_837 | 1 | GMR | H12 | 2 | 0.151   | 1.0080  |
| 39 | opls_838 | 1 | GMR | C13 | 2 | -0.1398 | 12.0110 |
| 40 | opls_839 | 1 | GMR | C14 | 2 | -0.111  | 12.0110 |
| 41 | opls_840 | 1 | GMR | H15 | 2 | 0.148   | 1.0080  |
| 42 | opls_841 | 1 | GMR | C16 | 2 | -0.1391 | 12.0110 |
| 43 | opls_842 | 1 | GMR | H17 | 2 | 0.1493  | 1.0080  |
| 44 | opls_843 | 1 | GMR | C18 | 2 | -0.1386 | 12.0110 |
| 45 | opls_844 | 1 | GMR | H19 | 2 | 0.1506  | 1.0080  |
| 46 | opls_845 | 1 | GMR | C1A | 2 | -0.1387 | 12.0110 |
| 47 | opls_846 | 1 | GMR | C1B | 2 | -0.1096 | 12.0110 |
| 48 | opls_847 | 1 | GMR | H1C | 2 | 0.1493  | 1.0080  |
| 49 | opls_848 | 1 | GMR | C1D | 2 | -0.1395 | 12.0110 |
| 50 | opls_849 | 1 | GMR | C1E | 2 | -0.1107 | 12.0110 |
| 51 | opls_850 | 1 | GMR | H1F | 2 | 0.1393  | 1.0080  |
| 52 | opls_851 | 1 | GMR | C1G | 2 | -0.1344 | 12.0110 |
| 53 | opls_852 | 1 | GMR | H1H | 2 | 0.1425  | 1.0080  |
| 54 | opls_853 | 1 | GMR | H1I | 2 | 0.1397  | 1.0080  |
| 55 | opls_854 | 1 | GMR | C1J | 2 | -0.1321 | 12.0110 |
| 56 | opls_855 | 1 | GMR | H1K | 2 | 0.1433  | 1.0080  |
| 57 | opls_856 | 1 | GMR | H1M | 2 | 0.1399  | 1.0080  |
| 58 | opls_857 | 1 | GMR | C1N | 2 | -0.1332 | 12.0110 |
| 59 | opls_858 | 1 | GMR | H1O | 2 | 0.1407  | 1.0080  |
| 60 | opls_859 | 1 | GMR | H1P | 2 | 0.1393  | 1.0080  |
| 61 | opls_860 | 1 | GMR | C1Q | 2 | -0.1344 | 12.0110 |
| 62 | opls_861 | 1 | GMR | H1R | 2 | 0.1427  | 1.0080  |
| 63 | opls_862 | 1 | GMR | H1S | 2 | 0.1395  | 1.0080  |
| 64 | opls_863 | 1 | GMR | C1T | 2 | -0.1325 | 12.0110 |
| 65 | opls_864 | 1 | GMR | H1U | 2 | 0.1433  | 1.0080  |
| 66 | opls_865 | 1 | GMR | H1V | 3 | 0.1396  | 1.0080  |
| 67 | opls_866 | 1 | GMR | H1W | 3 | 0.1404  | 1.0080  |
| 68 | opls_867 | 1 | GMR | H1X | 3 | 0.139   | 1.0080  |
| 69 | opls_868 | 1 | GMR | H1Y | 3 | 0.1396  | 1.0080  |
| 70 | opls_869 | 1 | GMR | H1Z | 3 | 0.1404  | 1.0080  |

[ bonds ]

2 1 1 0.1080 307105.600

|    |    |   |                   |
|----|----|---|-------------------|
| 3  | 2  | 1 | 0.1400 392459.200 |
| 4  | 2  | 1 | 0.1400 392459.200 |
| 5  | 3  | 1 | 0.1080 307105.600 |
| 6  | 3  | 1 | 0.1400 392459.200 |
| 7  | 4  | 1 | 0.1080 307105.600 |
| 8  | 4  | 1 | 0.1433 357313.600 |
| 9  | 6  | 1 | 0.1080 307105.600 |
| 10 | 6  | 1 | 0.1433 357313.600 |
| 11 | 8  | 1 | 0.1433 357313.600 |
| 12 | 10 | 1 | 0.1433 357313.600 |
| 13 | 11 | 1 | 0.1433 357313.600 |
| 14 | 11 | 1 | 0.1495 265265.600 |
| 15 | 12 | 1 | 0.1433 357313.600 |
| 16 | 13 | 1 | 0.1433 357313.600 |
| 17 | 13 | 1 | 0.1433 357313.600 |
| 18 | 14 | 1 | 0.1510 265265.600 |
| 19 | 14 | 1 | 0.1529 224262.400 |
| 20 | 15 | 1 | 0.1433 357313.600 |
| 21 | 15 | 1 | 0.1433 357313.600 |
| 22 | 16 | 1 | 0.1400 392459.200 |
| 23 | 16 | 1 | 0.1424 392459.200 |
| 24 | 17 | 1 | 0.1400 392459.200 |
| 25 | 17 | 1 | 0.1424 392459.200 |
| 26 | 18 | 1 | 0.1400 392459.200 |
| 27 | 18 | 1 | 0.1400 392459.200 |
| 28 | 19 | 1 | 0.1090 284512.000 |
| 29 | 19 | 1 | 0.1090 284512.000 |
| 30 | 19 | 1 | 0.1090 284512.000 |
| 31 | 20 | 1 | 0.1400 392459.200 |
| 32 | 20 | 1 | 0.1424 392459.200 |
| 33 | 21 | 1 | 0.1400 392459.200 |
| 34 | 21 | 1 | 0.1424 392459.200 |
| 35 | 22 | 1 | 0.1080 307105.600 |
| 36 | 22 | 1 | 0.1400 392459.200 |
| 37 | 23 | 1 | 0.1400 392459.200 |
| 38 | 24 | 1 | 0.1080 307105.600 |
| 39 | 24 | 1 | 0.1400 392459.200 |
| 40 | 25 | 1 | 0.1400 392459.200 |
| 41 | 26 | 1 | 0.1080 307105.600 |
| 42 | 26 | 1 | 0.1400 392459.200 |
| 43 | 27 | 1 | 0.1080 307105.600 |
| 44 | 27 | 1 | 0.1400 392459.200 |
| 45 | 31 | 1 | 0.1080 307105.600 |
| 46 | 31 | 1 | 0.1400 392459.200 |
| 47 | 32 | 1 | 0.1400 392459.200 |
| 48 | 33 | 1 | 0.1080 307105.600 |
| 49 | 33 | 1 | 0.1400 392459.200 |
| 50 | 34 | 1 | 0.1400 392459.200 |
| 51 | 36 | 1 | 0.1080 307105.600 |
| 52 | 36 | 1 | 0.1400 392459.200 |
| 53 | 37 | 1 | 0.1080 307105.600 |
| 54 | 39 | 1 | 0.1080 307105.600 |
| 55 | 39 | 1 | 0.1400 392459.200 |
| 56 | 40 | 1 | 0.1080 307105.600 |
| 57 | 42 | 1 | 0.1080 307105.600 |
| 58 | 42 | 1 | 0.1400 392459.200 |
| 59 | 44 | 1 | 0.1080 307105.600 |
| 60 | 46 | 1 | 0.1080 307105.600 |
| 61 | 46 | 1 | 0.1400 392459.200 |
| 62 | 47 | 1 | 0.1080 307105.600 |
| 63 | 49 | 1 | 0.1080 307105.600 |
| 64 | 49 | 1 | 0.1400 392459.200 |
| 65 | 50 | 1 | 0.1080 307105.600 |
| 66 | 52 | 1 | 0.1080 307105.600 |

```

67 55 1 0.1080 307105.600
68 58 1 0.1080 307105.600
69 61 1 0.1080 307105.600
70 64 1 0.1080 307105.600
10 8 1 0.1460 322168.000
14 12 1 0.1495 265265.600
25 23 1 0.1424 392459.200
34 32 1 0.1424 392459.200
52 37 1 0.1400 392459.200
55 40 1 0.1400 392459.200
58 44 1 0.1400 392459.200
61 47 1 0.1400 392459.200
64 50 1 0.1400 392459.200

```

[ angles ]

```

; ai aj ak funct c0 c1 c2 c3
1 2 3 1 120.000 292.880
1 2 4 1 120.000 292.880
2 3 5 1 120.000 292.880
2 3 6 1 120.000 527.184
2 4 7 1 120.000 292.880
2 4 8 1 124.000 585.760
3 6 9 1 120.000 292.880
3 6 10 1 124.000 585.760
4 8 11 1 115.690 382.752
6 10 12 1 115.690 382.752
8 11 13 1 119.200 525.092
8 11 14 1 119.200 525.092
10 12 15 1 119.200 525.092
11 13 16 1 115.690 382.752
11 13 17 1 115.690 382.752
11 14 18 1 109.500 334.720
11 14 19 1 115.600 527.184
12 15 20 1 115.690 382.752
12 15 21 1 115.690 382.752
13 16 22 1 124.000 585.760
13 16 23 1 124.000 585.760
13 17 24 1 124.000 585.760
13 17 25 1 124.000 585.760
14 18 26 1 120.000 585.760
14 18 27 1 120.000 585.760
14 19 28 1 110.700 313.800
14 19 29 1 110.700 313.800
14 19 30 1 110.700 313.800
15 20 31 1 124.000 585.760
15 20 32 1 124.000 585.760
15 21 33 1 124.000 585.760
15 21 34 1 124.000 585.760
16 22 35 1 120.000 292.880
16 22 36 1 120.000 527.184
16 23 37 1 120.000 527.184
17 24 38 1 120.000 292.880
17 24 39 1 120.000 527.184
17 25 40 1 120.000 527.184
18 26 41 1 120.000 292.880
18 26 42 1 120.000 527.184
18 27 43 1 120.000 292.880
18 27 44 1 120.000 527.184
20 31 45 1 120.000 292.880
20 31 46 1 120.000 527.184
20 32 47 1 120.000 527.184
21 33 48 1 120.000 292.880
21 33 49 1 120.000 527.184
21 34 50 1 120.000 527.184
22 36 51 1 120.000 292.880

```

|    |    |    |   |         |         |
|----|----|----|---|---------|---------|
| 22 | 36 | 52 | 1 | 120.000 | 527.184 |
| 23 | 37 | 53 | 1 | 120.000 | 292.880 |
| 24 | 39 | 54 | 1 | 120.000 | 292.880 |
| 24 | 39 | 55 | 1 | 120.000 | 527.184 |
| 25 | 40 | 56 | 1 | 120.000 | 292.880 |
| 26 | 42 | 57 | 1 | 120.000 | 292.880 |
| 26 | 42 | 58 | 1 | 120.000 | 527.184 |
| 27 | 44 | 59 | 1 | 120.000 | 292.880 |
| 31 | 46 | 60 | 1 | 120.000 | 292.880 |
| 31 | 46 | 61 | 1 | 120.000 | 527.184 |
| 32 | 47 | 62 | 1 | 120.000 | 292.880 |
| 33 | 49 | 63 | 1 | 120.000 | 292.880 |
| 33 | 49 | 64 | 1 | 120.000 | 527.184 |
| 34 | 50 | 65 | 1 | 120.000 | 292.880 |
| 36 | 52 | 66 | 1 | 120.000 | 292.880 |
| 39 | 55 | 67 | 1 | 120.000 | 292.880 |
| 42 | 58 | 68 | 1 | 120.000 | 292.880 |
| 46 | 61 | 69 | 1 | 120.000 | 292.880 |
| 49 | 64 | 70 | 1 | 120.000 | 292.880 |
| 7  | 4  | 8  | 1 | 118.990 | 539.820 |
| 38 | 24 | 39 | 1 | 120.000 | 292.880 |
| 21 | 34 | 32 | 1 | 120.000 | 527.184 |
| 44 | 58 | 68 | 1 | 120.000 | 292.880 |
| 47 | 61 | 69 | 1 | 120.000 | 292.880 |
| 6  | 10 | 8  | 1 | 117.000 | 711.280 |
| 57 | 42 | 58 | 1 | 120.000 | 292.880 |
| 43 | 27 | 44 | 1 | 120.000 | 292.880 |
| 12 | 14 | 19 | 1 | 115.600 | 527.184 |
| 16 | 23 | 25 | 1 | 120.000 | 527.184 |
| 8  | 10 | 12 | 1 | 117.000 | 711.280 |
| 27 | 44 | 58 | 1 | 120.000 | 527.184 |
| 46 | 61 | 47 | 1 | 120.000 | 527.184 |
| 34 | 32 | 47 | 1 | 120.000 | 527.184 |
| 4  | 8  | 10 | 1 | 117.000 | 711.280 |
| 49 | 64 | 50 | 1 | 120.000 | 527.184 |
| 10 | 8  | 11 | 1 | 117.000 | 711.280 |
| 40 | 55 | 67 | 1 | 120.000 | 292.880 |
| 52 | 37 | 53 | 1 | 120.000 | 292.880 |
| 54 | 39 | 55 | 1 | 120.000 | 292.880 |
| 63 | 49 | 64 | 1 | 120.000 | 292.880 |
| 31 | 20 | 32 | 1 | 120.000 | 527.184 |
| 61 | 47 | 62 | 1 | 120.000 | 292.880 |
| 20 | 15 | 21 | 1 | 115.690 | 382.752 |
| 28 | 19 | 29 | 1 | 107.800 | 276.144 |
| 39 | 55 | 40 | 1 | 120.000 | 527.184 |
| 55 | 40 | 56 | 1 | 120.000 | 292.880 |
| 18 | 14 | 19 | 1 | 114.000 | 527.184 |
| 11 | 14 | 12 | 1 | 109.500 | 334.720 |
| 9  | 6  | 10 | 1 | 118.990 | 539.820 |
| 12 | 14 | 18 | 1 | 109.500 | 334.720 |
| 13 | 11 | 14 | 1 | 119.200 | 525.092 |
| 35 | 22 | 36 | 1 | 120.000 | 292.880 |
| 5  | 3  | 6  | 1 | 120.000 | 292.880 |
| 33 | 21 | 34 | 1 | 120.000 | 527.184 |
| 28 | 19 | 30 | 1 | 107.800 | 276.144 |
| 24 | 17 | 25 | 1 | 120.000 | 527.184 |
| 14 | 12 | 15 | 1 | 119.200 | 525.092 |
| 29 | 19 | 30 | 1 | 107.800 | 276.144 |
| 51 | 36 | 52 | 1 | 120.000 | 292.880 |
| 25 | 23 | 37 | 1 | 120.000 | 527.184 |
| 58 | 44 | 59 | 1 | 120.000 | 292.880 |
| 50 | 64 | 70 | 1 | 120.000 | 292.880 |
| 37 | 52 | 66 | 1 | 120.000 | 292.880 |
| 32 | 34 | 50 | 1 | 120.000 | 527.184 |

```

17 25 23 1 120.000 527.184
42 58 44 1 120.000 527.184
45 31 46 1 120.000 292.880
32 47 61 1 120.000 527.184
23 25 40 1 120.000 527.184
60 46 61 1 120.000 292.880
20 32 34 1 120.000 527.184
3 2 4 1 120.000 527.184
25 40 55 1 120.000 527.184
64 50 65 1 120.000 292.880
10 12 14 1 119.200 525.092
34 50 64 1 120.000 527.184
16 13 17 1 115.690 382.752
23 37 52 1 120.000 527.184
22 16 23 1 120.000 527.184
26 18 27 1 120.000 527.184
48 33 49 1 120.000 292.880
41 26 42 1 120.000 292.880
36 52 37 1 120.000 527.184

```

[ dihedrals ]

; IMPROPER DIHEDRAL ANGLES

| ; ai | aj | ak | al | funct | c0      | c1     | c2 | c3 | c4 | c5 |
|------|----|----|----|-------|---------|--------|----|----|----|----|
| 8    | 4  | 2  | 7  | 4     | 180.000 | 10.460 | 2  |    |    |    |
| 10   | 6  | 3  | 9  | 4     | 180.000 | 10.460 | 2  |    |    |    |
| 15   | 12 | 10 | 14 | 4     | 180.000 | 10.460 | 2  |    |    |    |
| 64   | 49 | 33 | 63 | 4     | 180.000 | 10.460 | 2  |    |    |    |
| 61   | 46 | 31 | 60 | 4     | 180.000 | 10.460 | 2  |    |    |    |
| 58   | 42 | 26 | 57 | 4     | 180.000 | 10.460 | 2  |    |    |    |
| 55   | 39 | 24 | 54 | 4     | 180.000 | 10.460 | 2  |    |    |    |
| 52   | 36 | 22 | 51 | 4     | 180.000 | 10.460 | 2  |    |    |    |
| 6    | 3  | 2  | 5  | 4     | 180.000 | 10.460 | 2  |    |    |    |
| 44   | 27 | 18 | 43 | 4     | 180.000 | 10.460 | 2  |    |    |    |
| 42   | 26 | 18 | 41 | 4     | 180.000 | 10.460 | 2  |    |    |    |
| 49   | 33 | 21 | 48 | 4     | 180.000 | 10.460 | 2  |    |    |    |
| 36   | 22 | 16 | 35 | 4     | 180.000 | 10.460 | 2  |    |    |    |
| 46   | 31 | 20 | 45 | 4     | 180.000 | 10.460 | 2  |    |    |    |
| 39   | 24 | 17 | 38 | 4     | 180.000 | 10.460 | 2  |    |    |    |
| 27   | 18 | 14 | 26 | 4     | 180.000 | 10.460 | 2  |    |    |    |
| 4    | 2  | 1  | 3  | 4     | 180.000 | 10.460 | 2  |    |    |    |
| 37   | 23 | 16 | 25 | 4     | 180.000 | 10.460 | 2  |    |    |    |
| 50   | 34 | 21 | 32 | 4     | 180.000 | 10.460 | 2  |    |    |    |
| 47   | 32 | 20 | 34 | 4     | 180.000 | 10.460 | 2  |    |    |    |
| 40   | 25 | 17 | 23 | 4     | 180.000 | 10.460 | 2  |    |    |    |
| 11   | 8  | 4  | 10 | 4     | 180.000 | 10.460 | 2  |    |    |    |
| 12   | 10 | 6  | 8  | 4     | 180.000 | 10.460 | 2  |    |    |    |
| 17   | 13 | 11 | 16 | 4     | 180.000 | 10.460 | 2  |    |    |    |
| 21   | 15 | 12 | 20 | 4     | 180.000 | 10.460 | 2  |    |    |    |
| 34   | 21 | 15 | 33 | 4     | 180.000 | 10.460 | 2  |    |    |    |
| 32   | 20 | 15 | 31 | 4     | 180.000 | 10.460 | 2  |    |    |    |
| 25   | 17 | 13 | 24 | 4     | 180.000 | 10.460 | 2  |    |    |    |
| 23   | 16 | 13 | 22 | 4     | 180.000 | 10.460 | 2  |    |    |    |
| 14   | 11 | 8  | 13 | 4     | 180.000 | 10.460 | 2  |    |    |    |
| 68   | 58 | 42 | 44 | 4     | 180.000 | 10.460 | 2  |    |    |    |
| 69   | 61 | 46 | 47 | 4     | 180.000 | 10.460 | 2  |    |    |    |
| 59   | 44 | 27 | 58 | 4     | 180.000 | 10.460 | 2  |    |    |    |
| 70   | 64 | 49 | 50 | 4     | 180.000 | 10.460 | 2  |    |    |    |
| 67   | 55 | 39 | 40 | 4     | 180.000 | 10.460 | 2  |    |    |    |
| 66   | 52 | 36 | 37 | 4     | 180.000 | 10.460 | 2  |    |    |    |
| 56   | 40 | 25 | 55 | 4     | 180.000 | 10.460 | 2  |    |    |    |
| 53   | 37 | 23 | 52 | 4     | 180.000 | 10.460 | 2  |    |    |    |
| 65   | 50 | 34 | 64 | 4     | 180.000 | 10.460 | 2  |    |    |    |
| 62   | 47 | 32 | 61 | 4     | 180.000 | 10.460 | 2  |    |    |    |

[ dihedrals ]

; PROPER DIHEDRAL ANGLES

| ; ai | aj | ak | al | funct | c0     | c1     | c2      | c3     | c4     | c5    |
|------|----|----|----|-------|--------|--------|---------|--------|--------|-------|
| 8    | 10 | 6  | 3  | 3     | 16.027 | -4.391 | -14.029 | 2.393  | -0.000 | 0.000 |
| 10   | 8  | 4  | 2  | 3     | 16.027 | -4.391 | -14.029 | 2.393  | -0.000 | 0.000 |
| 10   | 8  | 4  | 7  | 3     | 30.334 | 0.000  | -30.334 | -0.000 | -0.000 | 0.000 |
| 8    | 4  | 2  | 3  | 3     | 30.334 | 0.000  | -30.334 | -0.000 | -0.000 | 0.000 |
| 10   | 6  | 3  | 2  | 3     | 30.334 | 0.000  | -30.334 | -0.000 | -0.000 | 0.000 |
| 10   | 6  | 3  | 5  | 3     | 30.334 | 0.000  | -30.334 | -0.000 | -0.000 | 0.000 |
| 8    | 4  | 2  | 1  | 3     | 30.334 | 0.000  | -30.334 | -0.000 | -0.000 | 0.000 |
| 13   | 11 | 8  | 10 | 3     | 30.334 | 0.000  | -30.334 | -0.000 | -0.000 | 0.000 |
| 15   | 12 | 10 | 8  | 3     | 30.334 | 0.000  | -30.334 | -0.000 | -0.000 | 0.000 |
| 15   | 12 | 10 | 6  | 3     | 9.079  | 0.000  | -9.079  | -0.000 | -0.000 | 0.000 |
| 13   | 11 | 8  | 4  | 3     | 9.079  | 0.000  | -9.079  | -0.000 | -0.000 | 0.000 |
| 15   | 12 | 14 | 11 | 3     | 9.079  | 0.000  | -9.079  | -0.000 | -0.000 | 0.000 |
| 13   | 11 | 14 | 12 | 3     | 9.079  | 0.000  | -9.079  | -0.000 | -0.000 | 0.000 |
| 6    | 10 | 8  | 4  | 3     | 0.628  | 1.883  | 0.000   | -2.510 | -0.000 | 0.000 |
| 58   | 42 | 26 | 18 | 3     | 30.334 | 0.000  | -30.334 | -0.000 | -0.000 | 0.000 |
| 58   | 44 | 27 | 18 | 3     | 30.334 | 0.000  | -30.334 | -0.000 | -0.000 | 0.000 |
| 50   | 64 | 49 | 33 | 3     | 30.334 | 0.000  | -30.334 | -0.000 | -0.000 | 0.000 |
| 44   | 58 | 42 | 26 | 3     | 30.334 | 0.000  | -30.334 | -0.000 | -0.000 | 0.000 |
| 42   | 58 | 44 | 27 | 3     | 30.334 | 0.000  | -30.334 | -0.000 | -0.000 | 0.000 |
| 42   | 26 | 18 | 27 | 3     | 30.334 | 0.000  | -30.334 | -0.000 | -0.000 | 0.000 |
| 47   | 61 | 46 | 31 | 3     | 30.334 | 0.000  | -30.334 | -0.000 | -0.000 | 0.000 |
| 37   | 52 | 36 | 22 | 3     | 30.334 | 0.000  | -30.334 | -0.000 | -0.000 | 0.000 |
| 40   | 55 | 39 | 24 | 3     | 30.334 | 0.000  | -30.334 | -0.000 | -0.000 | 0.000 |
| 44   | 27 | 18 | 26 | 3     | 30.334 | 0.000  | -30.334 | -0.000 | -0.000 | 0.000 |
| 6    | 3  | 2  | 4  | 3     | 30.334 | 0.000  | -30.334 | -0.000 | -0.000 | 0.000 |
| 61   | 46 | 31 | 20 | 3     | 30.334 | 0.000  | -30.334 | -0.000 | -0.000 | 0.000 |
| 36   | 52 | 37 | 23 | 3     | 30.334 | 0.000  | -30.334 | -0.000 | -0.000 | 0.000 |
| 46   | 61 | 47 | 32 | 3     | 30.334 | 0.000  | -30.334 | -0.000 | -0.000 | 0.000 |
| 39   | 55 | 40 | 25 | 3     | 30.334 | 0.000  | -30.334 | -0.000 | -0.000 | 0.000 |
| 52   | 36 | 22 | 16 | 3     | 30.334 | 0.000  | -30.334 | -0.000 | -0.000 | 0.000 |
| 55   | 39 | 24 | 17 | 3     | 30.334 | 0.000  | -30.334 | -0.000 | -0.000 | 0.000 |
| 64   | 49 | 33 | 21 | 3     | 30.334 | 0.000  | -30.334 | -0.000 | -0.000 | 0.000 |
| 49   | 64 | 50 | 34 | 3     | 30.334 | 0.000  | -30.334 | -0.000 | -0.000 | 0.000 |
| 42   | 26 | 18 | 14 | 3     | 30.334 | 0.000  | -30.334 | -0.000 | -0.000 | 0.000 |
| 44   | 27 | 18 | 14 | 3     | 30.334 | 0.000  | -30.334 | -0.000 | -0.000 | 0.000 |
| 55   | 39 | 24 | 38 | 3     | 30.334 | 0.000  | -30.334 | -0.000 | -0.000 | 0.000 |
| 64   | 49 | 33 | 48 | 3     | 30.334 | 0.000  | -30.334 | -0.000 | -0.000 | 0.000 |
| 52   | 36 | 22 | 35 | 3     | 30.334 | 0.000  | -30.334 | -0.000 | -0.000 | 0.000 |
| 61   | 46 | 31 | 45 | 3     | 30.334 | 0.000  | -30.334 | -0.000 | -0.000 | 0.000 |
| 58   | 42 | 26 | 41 | 3     | 30.334 | 0.000  | -30.334 | -0.000 | -0.000 | 0.000 |
| 58   | 44 | 27 | 43 | 3     | 30.334 | 0.000  | -30.334 | -0.000 | -0.000 | 0.000 |
| 6    | 3  | 2  | 1  | 3     | 30.334 | 0.000  | -30.334 | -0.000 | -0.000 | 0.000 |
| 46   | 31 | 20 | 15 | 3     | 30.334 | 0.000  | -30.334 | -0.000 | -0.000 | 0.000 |
| 36   | 22 | 16 | 13 | 3     | 30.334 | 0.000  | -30.334 | -0.000 | -0.000 | 0.000 |
| 39   | 24 | 17 | 13 | 3     | 30.334 | 0.000  | -30.334 | -0.000 | -0.000 | 0.000 |
| 49   | 33 | 21 | 15 | 3     | 30.334 | 0.000  | -30.334 | -0.000 | -0.000 | 0.000 |
| 36   | 22 | 16 | 23 | 3     | 9.079  | 0.000  | -9.079  | -0.000 | -0.000 | 0.000 |
| 64   | 50 | 34 | 21 | 3     | 9.079  | 0.000  | -9.079  | -0.000 | -0.000 | 0.000 |
| 39   | 24 | 17 | 25 | 3     | 9.079  | 0.000  | -9.079  | -0.000 | -0.000 | 0.000 |
| 64   | 50 | 34 | 32 | 3     | 9.079  | 0.000  | -9.079  | -0.000 | -0.000 | 0.000 |
| 55   | 40 | 25 | 17 | 3     | 9.079  | 0.000  | -9.079  | -0.000 | -0.000 | 0.000 |
| 46   | 31 | 20 | 32 | 3     | 9.079  | 0.000  | -9.079  | -0.000 | -0.000 | 0.000 |
| 52   | 37 | 23 | 16 | 3     | 9.079  | 0.000  | -9.079  | -0.000 | -0.000 | 0.000 |
| 55   | 40 | 25 | 23 | 3     | 9.079  | 0.000  | -9.079  | -0.000 | -0.000 | 0.000 |
| 52   | 37 | 23 | 25 | 3     | 9.079  | 0.000  | -9.079  | -0.000 | -0.000 | 0.000 |
| 49   | 33 | 21 | 34 | 3     | 9.079  | 0.000  | -9.079  | -0.000 | -0.000 | 0.000 |
| 61   | 47 | 32 | 20 | 3     | 9.079  | 0.000  | -9.079  | -0.000 | -0.000 | 0.000 |
| 61   | 47 | 32 | 34 | 3     | 9.079  | 0.000  | -9.079  | -0.000 | -0.000 | 0.000 |
| 27   | 18 | 14 | 11 | 3     | 0.000  | 0.000  | 0.000   | -0.000 | -0.000 | 0.000 |
| 26   | 18 | 14 | 12 | 3     | 0.000  | 0.000  | 0.000   | -0.000 | -0.000 | 0.000 |
| 26   | 18 | 14 | 11 | 3     | 0.000  | 0.000  | 0.000   | -0.000 | -0.000 | 0.000 |
| 27   | 18 | 14 | 12 | 3     | 0.000  | 0.000  | 0.000   | -0.000 | -0.000 | 0.000 |
| 26   | 18 | 14 | 19 | 3     | 0.000  | 0.000  | 0.000   | -0.000 | -0.000 | 0.000 |

|    |    |    |    |   |        |        |         |        |        |       |
|----|----|----|----|---|--------|--------|---------|--------|--------|-------|
| 27 | 18 | 14 | 19 | 3 | 0.000  | 0.000  | 0.000   | -0.000 | -0.000 | 0.000 |
| 24 | 17 | 13 | 11 | 3 | 9.079  | 0.000  | -9.079  | -0.000 | -0.000 | 0.000 |
| 22 | 16 | 13 | 11 | 3 | 9.079  | 0.000  | -9.079  | -0.000 | -0.000 | 0.000 |
| 33 | 21 | 15 | 20 | 3 | 9.079  | 0.000  | -9.079  | -0.000 | -0.000 | 0.000 |
| 33 | 21 | 15 | 12 | 3 | 9.079  | 0.000  | -9.079  | -0.000 | -0.000 | 0.000 |
| 31 | 20 | 15 | 21 | 3 | 9.079  | 0.000  | -9.079  | -0.000 | -0.000 | 0.000 |
| 24 | 17 | 13 | 16 | 3 | 9.079  | 0.000  | -9.079  | -0.000 | -0.000 | 0.000 |
| 22 | 16 | 13 | 17 | 3 | 9.079  | 0.000  | -9.079  | -0.000 | -0.000 | 0.000 |
| 31 | 20 | 15 | 12 | 3 | 9.079  | 0.000  | -9.079  | -0.000 | -0.000 | 0.000 |
| 50 | 34 | 21 | 15 | 3 | 9.079  | 0.000  | -9.079  | -0.000 | -0.000 | 0.000 |
| 47 | 32 | 20 | 15 | 3 | 9.079  | 0.000  | -9.079  | -0.000 | -0.000 | 0.000 |
| 40 | 25 | 17 | 13 | 3 | 9.079  | 0.000  | -9.079  | -0.000 | -0.000 | 0.000 |
| 37 | 23 | 16 | 13 | 3 | 9.079  | 0.000  | -9.079  | -0.000 | -0.000 | 0.000 |
| 50 | 34 | 32 | 47 | 3 | 9.079  | 0.000  | -9.079  | -0.000 | -0.000 | 0.000 |
| 40 | 25 | 23 | 37 | 3 | 9.079  | 0.000  | -9.079  | -0.000 | -0.000 | 0.000 |
| 40 | 25 | 17 | 24 | 3 | 9.079  | 0.000  | -9.079  | -0.000 | -0.000 | 0.000 |
| 50 | 34 | 21 | 33 | 3 | 9.079  | 0.000  | -9.079  | -0.000 | -0.000 | 0.000 |
| 37 | 23 | 16 | 22 | 3 | 9.079  | 0.000  | -9.079  | -0.000 | -0.000 | 0.000 |
| 47 | 32 | 20 | 31 | 3 | 9.079  | 0.000  | -9.079  | -0.000 | -0.000 | 0.000 |
| 50 | 34 | 32 | 20 | 3 | 9.079  | 0.000  | -9.079  | -0.000 | -0.000 | 0.000 |
| 40 | 25 | 23 | 16 | 3 | 9.079  | 0.000  | -9.079  | -0.000 | -0.000 | 0.000 |
| 24 | 17 | 25 | 23 | 3 | 9.079  | 0.000  | -9.079  | -0.000 | -0.000 | 0.000 |
| 47 | 32 | 34 | 21 | 3 | 9.079  | 0.000  | -9.079  | -0.000 | -0.000 | 0.000 |
| 33 | 21 | 34 | 32 | 3 | 9.079  | 0.000  | -9.079  | -0.000 | -0.000 | 0.000 |
| 37 | 23 | 25 | 17 | 3 | 9.079  | 0.000  | -9.079  | -0.000 | -0.000 | 0.000 |
| 18 | 14 | 12 | 10 | 3 | 9.079  | 0.000  | -9.079  | -0.000 | -0.000 | 0.000 |
| 18 | 14 | 11 | 8  | 3 | 9.079  | 0.000  | -9.079  | -0.000 | -0.000 | 0.000 |
| 18 | 14 | 12 | 15 | 3 | 9.079  | 0.000  | -9.079  | -0.000 | -0.000 | 0.000 |
| 18 | 14 | 11 | 13 | 3 | 9.079  | 0.000  | -9.079  | -0.000 | -0.000 | 0.000 |
| 11 | 8  | 10 | 6  | 3 | 0.628  | 1.883  | 0.000   | -2.510 | -0.000 | 0.000 |
| 12 | 10 | 8  | 4  | 3 | 0.628  | 1.883  | 0.000   | -2.510 | -0.000 | 0.000 |
| 12 | 10 | 8  | 11 | 3 | 0.628  | 1.883  | 0.000   | -2.510 | -0.000 | 0.000 |
| 12 | 10 | 6  | 3  | 3 | 16.027 | -4.391 | -14.029 | 2.393  | -0.000 | 0.000 |
| 11 | 8  | 4  | 2  | 3 | 16.027 | -4.391 | -14.029 | 2.393  | -0.000 | 0.000 |
| 12 | 10 | 6  | 9  | 3 | 30.334 | 0.000  | -30.334 | -0.000 | -0.000 | 0.000 |
| 11 | 8  | 4  | 7  | 3 | 30.334 | 0.000  | -30.334 | -0.000 | -0.000 | 0.000 |
| 21 | 15 | 12 | 10 | 3 | 9.079  | 0.000  | -9.079  | -0.000 | -0.000 | 0.000 |
| 17 | 13 | 11 | 8  | 3 | 9.079  | 0.000  | -9.079  | -0.000 | -0.000 | 0.000 |
| 16 | 13 | 11 | 8  | 3 | 9.079  | 0.000  | -9.079  | -0.000 | -0.000 | 0.000 |
| 20 | 15 | 12 | 10 | 3 | 9.079  | 0.000  | -9.079  | -0.000 | -0.000 | 0.000 |
| 16 | 13 | 11 | 14 | 3 | 9.079  | 0.000  | -9.079  | -0.000 | -0.000 | 0.000 |
| 21 | 15 | 12 | 14 | 3 | 9.079  | 0.000  | -9.079  | -0.000 | -0.000 | 0.000 |
| 17 | 13 | 11 | 14 | 3 | 9.079  | 0.000  | -9.079  | -0.000 | -0.000 | 0.000 |
| 20 | 15 | 12 | 14 | 3 | 9.079  | 0.000  | -9.079  | -0.000 | -0.000 | 0.000 |
| 32 | 20 | 15 | 12 | 3 | 9.079  | 0.000  | -9.079  | -0.000 | -0.000 | 0.000 |
| 32 | 20 | 15 | 21 | 3 | 9.079  | 0.000  | -9.079  | -0.000 | -0.000 | 0.000 |
| 34 | 21 | 15 | 20 | 3 | 9.079  | 0.000  | -9.079  | -0.000 | -0.000 | 0.000 |
| 25 | 17 | 13 | 16 | 3 | 9.079  | 0.000  | -9.079  | -0.000 | -0.000 | 0.000 |
| 34 | 21 | 15 | 12 | 3 | 9.079  | 0.000  | -9.079  | -0.000 | -0.000 | 0.000 |
| 23 | 16 | 13 | 11 | 3 | 9.079  | 0.000  | -9.079  | -0.000 | -0.000 | 0.000 |
| 25 | 17 | 13 | 11 | 3 | 9.079  | 0.000  | -9.079  | -0.000 | -0.000 | 0.000 |
| 23 | 16 | 13 | 17 | 3 | 9.079  | 0.000  | -9.079  | -0.000 | -0.000 | 0.000 |
| 25 | 23 | 16 | 13 | 3 | 9.079  | 0.000  | -9.079  | -0.000 | -0.000 | 0.000 |
| 23 | 25 | 17 | 13 | 3 | 9.079  | 0.000  | -9.079  | -0.000 | -0.000 | 0.000 |
| 34 | 32 | 20 | 15 | 3 | 9.079  | 0.000  | -9.079  | -0.000 | -0.000 | 0.000 |
| 32 | 34 | 21 | 15 | 3 | 9.079  | 0.000  | -9.079  | -0.000 | -0.000 | 0.000 |
| 25 | 23 | 16 | 22 | 3 | 9.079  | 0.000  | -9.079  | -0.000 | -0.000 | 0.000 |
| 34 | 32 | 20 | 31 | 3 | 9.079  | 0.000  | -9.079  | -0.000 | -0.000 | 0.000 |
| 21 | 34 | 32 | 20 | 3 | 9.079  | 0.000  | -9.079  | -0.000 | -0.000 | 0.000 |
| 17 | 25 | 23 | 16 | 3 | 9.079  | 0.000  | -9.079  | -0.000 | -0.000 | 0.000 |
| 11 | 14 | 12 | 10 | 3 | 9.079  | 0.000  | -9.079  | -0.000 | -0.000 | 0.000 |
| 12 | 14 | 11 | 8  | 3 | 9.079  | 0.000  | -9.079  | -0.000 | -0.000 | 0.000 |
| 14 | 11 | 8  | 10 | 3 | 0.527  | -6.397 | -1.695  | 7.565  | -0.000 | 0.000 |
| 14 | 12 | 10 | 8  | 3 | 0.527  | -6.397 | -1.695  | 7.565  | -0.000 | 0.000 |

|    |    |    |    |   |        |       |         |        |        |       |
|----|----|----|----|---|--------|-------|---------|--------|--------|-------|
| 14 | 12 | 10 | 6  | 3 | 58.576 | 0.000 | -58.576 | -0.000 | -0.000 | 0.000 |
| 14 | 11 | 8  | 4  | 3 | 58.576 | 0.000 | -58.576 | -0.000 | -0.000 | 0.000 |
| 19 | 14 | 12 | 10 | 3 | 0.000  | 0.000 | 0.000   | -0.000 | -0.000 | 0.000 |
| 19 | 14 | 12 | 15 | 3 | 0.000  | 0.000 | 0.000   | -0.000 | -0.000 | 0.000 |
| 19 | 14 | 11 | 13 | 3 | 0.000  | 0.000 | 0.000   | -0.000 | -0.000 | 0.000 |
| 19 | 14 | 11 | 8  | 3 | 0.000  | 0.000 | 0.000   | -0.000 | -0.000 | 0.000 |
| 9  | 6  | 10 | 8  | 3 | 30.334 | 0.000 | -30.334 | -0.000 | -0.000 | 0.000 |
| 63 | 49 | 64 | 50 | 3 | 30.334 | 0.000 | -30.334 | -0.000 | -0.000 | 0.000 |
| 59 | 44 | 27 | 18 | 3 | 30.334 | 0.000 | -30.334 | -0.000 | -0.000 | 0.000 |
| 68 | 58 | 42 | 26 | 3 | 30.334 | 0.000 | -30.334 | -0.000 | -0.000 | 0.000 |
| 70 | 64 | 49 | 33 | 3 | 30.334 | 0.000 | -30.334 | -0.000 | -0.000 | 0.000 |
| 56 | 40 | 55 | 39 | 3 | 30.334 | 0.000 | -30.334 | -0.000 | -0.000 | 0.000 |
| 60 | 46 | 61 | 47 | 3 | 30.334 | 0.000 | -30.334 | -0.000 | -0.000 | 0.000 |
| 41 | 26 | 18 | 27 | 3 | 30.334 | 0.000 | -30.334 | -0.000 | -0.000 | 0.000 |
| 9  | 6  | 3  | 2  | 3 | 30.334 | 0.000 | -30.334 | -0.000 | -0.000 | 0.000 |
| 59 | 44 | 58 | 42 | 3 | 30.334 | 0.000 | -30.334 | -0.000 | -0.000 | 0.000 |
| 5  | 3  | 2  | 4  | 3 | 30.334 | 0.000 | -30.334 | -0.000 | -0.000 | 0.000 |
| 54 | 39 | 55 | 40 | 3 | 30.334 | 0.000 | -30.334 | -0.000 | -0.000 | 0.000 |
| 66 | 52 | 36 | 22 | 3 | 30.334 | 0.000 | -30.334 | -0.000 | -0.000 | 0.000 |
| 65 | 50 | 64 | 49 | 3 | 30.334 | 0.000 | -30.334 | -0.000 | -0.000 | 0.000 |
| 69 | 61 | 46 | 31 | 3 | 30.334 | 0.000 | -30.334 | -0.000 | -0.000 | 0.000 |
| 43 | 27 | 18 | 26 | 3 | 30.334 | 0.000 | -30.334 | -0.000 | -0.000 | 0.000 |
| 51 | 36 | 52 | 37 | 3 | 30.334 | 0.000 | -30.334 | -0.000 | -0.000 | 0.000 |
| 62 | 47 | 61 | 46 | 3 | 30.334 | 0.000 | -30.334 | -0.000 | -0.000 | 0.000 |
| 67 | 55 | 39 | 24 | 3 | 30.334 | 0.000 | -30.334 | -0.000 | -0.000 | 0.000 |
| 57 | 42 | 26 | 18 | 3 | 30.334 | 0.000 | -30.334 | -0.000 | -0.000 | 0.000 |
| 68 | 58 | 44 | 27 | 3 | 30.334 | 0.000 | -30.334 | -0.000 | -0.000 | 0.000 |
| 57 | 42 | 58 | 44 | 3 | 30.334 | 0.000 | -30.334 | -0.000 | -0.000 | 0.000 |
| 7  | 4  | 2  | 3  | 3 | 30.334 | 0.000 | -30.334 | -0.000 | -0.000 | 0.000 |
| 53 | 37 | 52 | 36 | 3 | 30.334 | 0.000 | -30.334 | -0.000 | -0.000 | 0.000 |
| 66 | 52 | 37 | 23 | 3 | 30.334 | 0.000 | -30.334 | -0.000 | -0.000 | 0.000 |
| 54 | 39 | 24 | 17 | 3 | 30.334 | 0.000 | -30.334 | -0.000 | -0.000 | 0.000 |
| 67 | 55 | 40 | 25 | 3 | 30.334 | 0.000 | -30.334 | -0.000 | -0.000 | 0.000 |
| 63 | 49 | 33 | 21 | 3 | 30.334 | 0.000 | -30.334 | -0.000 | -0.000 | 0.000 |
| 69 | 61 | 47 | 32 | 3 | 30.334 | 0.000 | -30.334 | -0.000 | -0.000 | 0.000 |
| 60 | 46 | 31 | 20 | 3 | 30.334 | 0.000 | -30.334 | -0.000 | -0.000 | 0.000 |
| 70 | 64 | 50 | 34 | 3 | 30.334 | 0.000 | -30.334 | -0.000 | -0.000 | 0.000 |
| 51 | 36 | 22 | 16 | 3 | 30.334 | 0.000 | -30.334 | -0.000 | -0.000 | 0.000 |
| 43 | 27 | 18 | 14 | 3 | 30.334 | 0.000 | -30.334 | -0.000 | -0.000 | 0.000 |
| 41 | 26 | 18 | 14 | 3 | 30.334 | 0.000 | -30.334 | -0.000 | -0.000 | 0.000 |
| 9  | 6  | 3  | 5  | 3 | 30.334 | 0.000 | -30.334 | -0.000 | -0.000 | 0.000 |
| 70 | 64 | 49 | 63 | 3 | 30.334 | 0.000 | -30.334 | -0.000 | -0.000 | 0.000 |
| 57 | 42 | 26 | 41 | 3 | 30.334 | 0.000 | -30.334 | -0.000 | -0.000 | 0.000 |
| 59 | 44 | 27 | 43 | 3 | 30.334 | 0.000 | -30.334 | -0.000 | -0.000 | 0.000 |
| 60 | 46 | 31 | 45 | 3 | 30.334 | 0.000 | -30.334 | -0.000 | -0.000 | 0.000 |
| 68 | 58 | 44 | 59 | 3 | 30.334 | 0.000 | -30.334 | -0.000 | -0.000 | 0.000 |
| 67 | 55 | 40 | 56 | 3 | 30.334 | 0.000 | -30.334 | -0.000 | -0.000 | 0.000 |
| 67 | 55 | 39 | 54 | 3 | 30.334 | 0.000 | -30.334 | -0.000 | -0.000 | 0.000 |
| 54 | 39 | 24 | 38 | 3 | 30.334 | 0.000 | -30.334 | -0.000 | -0.000 | 0.000 |
| 5  | 3  | 2  | 1  | 3 | 30.334 | 0.000 | -30.334 | -0.000 | -0.000 | 0.000 |
| 70 | 64 | 50 | 65 | 3 | 30.334 | 0.000 | -30.334 | -0.000 | -0.000 | 0.000 |
| 63 | 49 | 33 | 48 | 3 | 30.334 | 0.000 | -30.334 | -0.000 | -0.000 | 0.000 |
| 51 | 36 | 22 | 35 | 3 | 30.334 | 0.000 | -30.334 | -0.000 | -0.000 | 0.000 |
| 66 | 52 | 37 | 53 | 3 | 30.334 | 0.000 | -30.334 | -0.000 | -0.000 | 0.000 |
| 68 | 58 | 42 | 57 | 3 | 30.334 | 0.000 | -30.334 | -0.000 | -0.000 | 0.000 |
| 66 | 52 | 36 | 51 | 3 | 30.334 | 0.000 | -30.334 | -0.000 | -0.000 | 0.000 |
| 7  | 4  | 2  | 1  | 3 | 30.334 | 0.000 | -30.334 | -0.000 | -0.000 | 0.000 |
| 69 | 61 | 46 | 60 | 3 | 30.334 | 0.000 | -30.334 | -0.000 | -0.000 | 0.000 |
| 69 | 61 | 47 | 62 | 3 | 30.334 | 0.000 | -30.334 | -0.000 | -0.000 | 0.000 |
| 35 | 22 | 16 | 13 | 3 | 30.334 | 0.000 | -30.334 | -0.000 | -0.000 | 0.000 |
| 48 | 33 | 21 | 15 | 3 | 30.334 | 0.000 | -30.334 | -0.000 | -0.000 | 0.000 |
| 38 | 24 | 17 | 13 | 3 | 30.334 | 0.000 | -30.334 | -0.000 | -0.000 | 0.000 |
| 45 | 31 | 20 | 15 | 3 | 30.334 | 0.000 | -30.334 | -0.000 | -0.000 | 0.000 |
| 65 | 50 | 34 | 21 | 3 | 30.334 | 0.000 | -30.334 | -0.000 | -0.000 | 0.000 |



|    |    |    |    |   |        |       |         |        |        |       |
|----|----|----|----|---|--------|-------|---------|--------|--------|-------|
| 56 | 40 | 25 | 17 | 3 | 30.334 | 0.000 | -30.334 | -0.000 | -0.000 | 0.000 |
| 53 | 37 | 23 | 25 | 3 | 30.334 | 0.000 | -30.334 | -0.000 | -0.000 | 0.000 |
| 38 | 24 | 17 | 25 | 3 | 30.334 | 0.000 | -30.334 | -0.000 | -0.000 | 0.000 |
| 45 | 31 | 20 | 32 | 3 | 30.334 | 0.000 | -30.334 | -0.000 | -0.000 | 0.000 |
| 62 | 47 | 32 | 20 | 3 | 30.334 | 0.000 | -30.334 | -0.000 | -0.000 | 0.000 |
| 65 | 50 | 34 | 32 | 3 | 30.334 | 0.000 | -30.334 | -0.000 | -0.000 | 0.000 |
| 53 | 37 | 23 | 16 | 3 | 30.334 | 0.000 | -30.334 | -0.000 | -0.000 | 0.000 |
| 62 | 47 | 32 | 34 | 3 | 30.334 | 0.000 | -30.334 | -0.000 | -0.000 | 0.000 |
| 48 | 33 | 21 | 34 | 3 | 30.334 | 0.000 | -30.334 | -0.000 | -0.000 | 0.000 |
| 56 | 40 | 25 | 23 | 3 | 30.334 | 0.000 | -30.334 | -0.000 | -0.000 | 0.000 |
| 35 | 22 | 16 | 23 | 3 | 30.334 | 0.000 | -30.334 | -0.000 | -0.000 | 0.000 |
| 28 | 19 | 14 | 18 | 3 | 0.967  | 2.900 | 0.000   | -3.866 | -0.000 | 0.000 |
| 30 | 19 | 14 | 18 | 3 | 0.967  | 2.900 | 0.000   | -3.866 | -0.000 | 0.000 |
| 29 | 19 | 14 | 18 | 3 | 0.967  | 2.900 | 0.000   | -3.866 | -0.000 | 0.000 |
| 29 | 19 | 14 | 12 | 3 | 0.967  | 2.900 | 0.000   | -3.866 | -0.000 | 0.000 |
| 30 | 19 | 14 | 11 | 3 | 0.967  | 2.900 | 0.000   | -3.866 | -0.000 | 0.000 |
| 28 | 19 | 14 | 11 | 3 | 0.967  | 2.900 | 0.000   | -3.866 | -0.000 | 0.000 |
| 28 | 19 | 14 | 12 | 3 | 0.967  | 2.900 | 0.000   | -3.866 | -0.000 | 0.000 |
| 29 | 19 | 14 | 11 | 3 | 0.967  | 2.900 | 0.000   | -3.866 | -0.000 | 0.000 |
| 30 | 19 | 14 | 12 | 3 | 0.967  | 2.900 | 0.000   | -3.866 | -0.000 | 0.000 |

[ pairs ]

|    |    |   |
|----|----|---|
| 1  | 5  | 1 |
| 1  | 6  | 1 |
| 1  | 7  | 1 |
| 4  | 5  | 1 |
| 1  | 8  | 1 |
| 4  | 6  | 1 |
| 3  | 7  | 1 |
| 3  | 8  | 1 |
| 2  | 9  | 1 |
| 2  | 10 | 1 |
| 2  | 11 | 1 |
| 5  | 9  | 1 |
| 5  | 10 | 1 |
| 3  | 12 | 1 |
| 4  | 12 | 1 |
| 8  | 9  | 1 |
| 7  | 10 | 1 |
| 6  | 11 | 1 |
| 4  | 13 | 1 |
| 7  | 11 | 1 |
| 4  | 14 | 1 |
| 6  | 14 | 1 |
| 9  | 12 | 1 |
| 6  | 15 | 1 |
| 10 | 13 | 1 |
| 8  | 15 | 1 |
| 8  | 16 | 1 |
| 12 | 13 | 1 |
| 8  | 17 | 1 |
| 11 | 15 | 1 |
| 8  | 18 | 1 |
| 8  | 19 | 1 |
| 10 | 18 | 1 |
| 10 | 19 | 1 |
| 14 | 16 | 1 |
| 10 | 20 | 1 |
| 14 | 17 | 1 |
| 13 | 18 | 1 |
| 10 | 21 | 1 |
| 13 | 19 | 1 |
| 15 | 18 | 1 |
| 11 | 22 | 1 |

15 19 1  
14 20 1  
11 23 1  
14 21 1  
11 24 1  
11 25 1  
11 26 1  
12 26 1  
11 27 1  
17 22 1  
12 27 1  
11 28 1  
16 24 1  
12 28 1  
11 29 1  
12 29 1  
11 30 1  
12 30 1  
12 31 1  
12 32 1  
19 26 1  
12 33 1  
19 27 1  
18 28 1  
12 34 1  
23 24 1  
22 25 1  
18 29 1  
18 30 1  
13 35 1  
13 36 1  
13 37 1  
13 38 1  
21 31 1  
13 39 1  
20 33 1  
13 40 1  
17 37 1  
14 41 1  
16 40 1  
14 42 1  
14 43 1  
23 35 1  
14 44 1  
23 36 1  
22 37 1  
15 45 1  
15 46 1  
15 47 1  
25 38 1  
15 48 1  
25 39 1  
24 40 1  
15 49 1  
32 33 1  
31 34 1  
15 50 1  
16 51 1  
27 41 1  
21 47 1  
16 52 1  
27 42 1  
26 43 1  
16 53 1

26 44 1  
20 50 1  
17 54 1  
17 55 1  
17 56 1  
18 57 1  
18 58 1  
37 40 1  
32 45 1  
25 52 1  
18 59 1  
32 46 1  
31 47 1  
25 53 1  
23 55 1  
23 56 1  
20 60 1  
20 61 1  
34 48 1  
20 62 1  
34 49 1  
33 50 1  
21 63 1  
21 64 1  
35 51 1  
21 65 1  
35 52 1  
37 51 1  
22 66 1  
36 53 1  
23 66 1  
24 67 1  
38 54 1  
25 67 1  
38 55 1  
40 54 1  
26 68 1  
39 56 1  
34 61 1  
27 68 1  
34 62 1  
32 64 1  
47 50 1  
32 65 1  
41 57 1  
41 58 1  
31 69 1  
44 57 1  
43 58 1  
42 59 1  
32 69 1  
43 59 1  
33 70 1  
34 70 1  
45 60 1  
45 61 1  
47 60 1  
46 62 1  
48 63 1  
48 64 1  
50 63 1  
49 65 1  
51 66 1  
53 66 1

```
54 67 1
56 67 1
57 68 1
59 68 1
60 69 1
62 69 1
63 70 1
65 70 1
```

```
#ifdef POSRES
#include "posre.itp"
#endif
```
